# Supplementary material for: Quantitative Proteomics and Differential Protein Abundance Analysis after the Depletion of PEX3 from Human Cells Identifies Additional Aspects of Protein Targeting to the ER
Source: MDPI journal article supplement (doi:10.3390/ijms222313028), 2021-12-01
Supplement: s1 [file s1]

The mass spectrometry proteomics data (.raw and .txt files) have been deposited to the ProteomeXchange Consortium via the PRIDE partner repository with the dataset identifiers: PXD012005 (<http://www.proteomexchange.org>).

Orbi2695      PEX3 experiment & Zellweger patient fibroblasts

Sample 1-3    scr control siRNA

Sample 4-6    PEX3 siRNA #1

Sample 7-9    PEX3 siRNA #2

Sample 10-12 control fibroblasts #3

Sample 13-15 Zellweger patient fibroblasts  $\Delta$ PEX3
