# Supplementary material for: Quantitative Proteomics and Differential Protein Abundance Analysis after the Depletion of PEX3 from Human Cells Identifies Additional Aspects of Protein Targeting to the ER
Source: MDPI journal article supplement (doi:10.3390/ijms222313028), 2021-12-01
Supplement: s1 [file s1]

Original blots, Figure 2  
Molecular mass markers are indicated

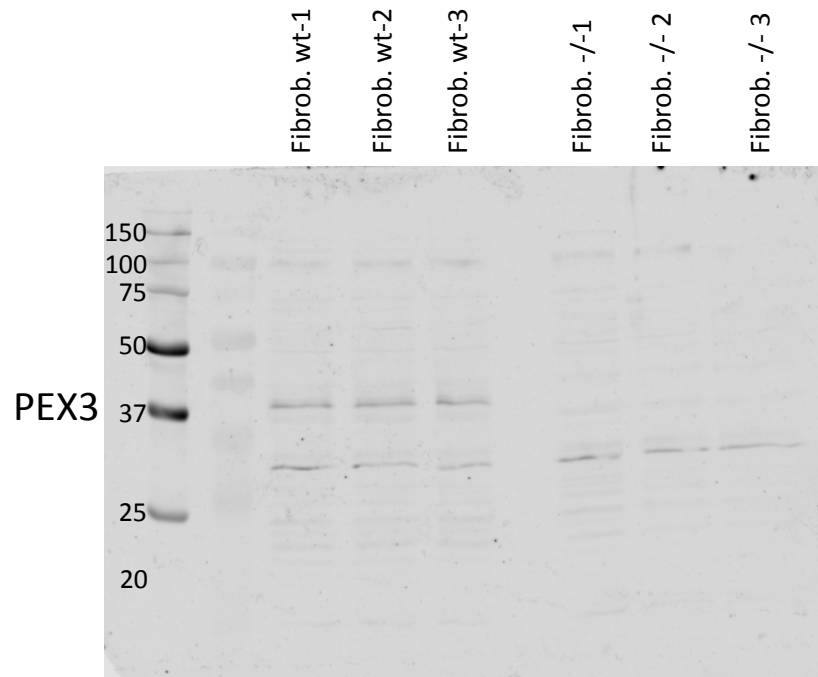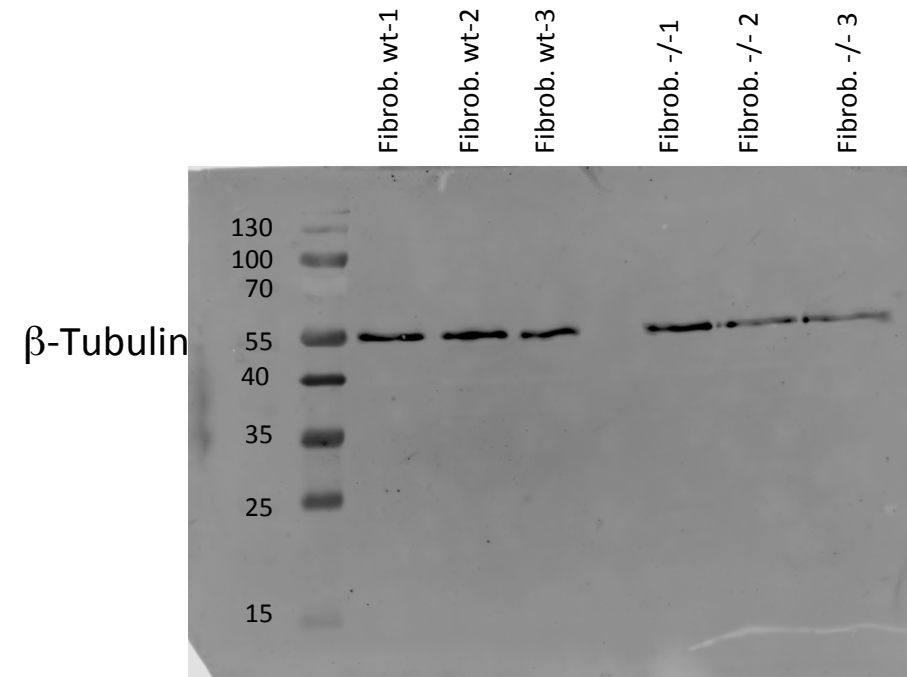

Original blots, Figure 3, a and b  
Molecular mass markers are indicated

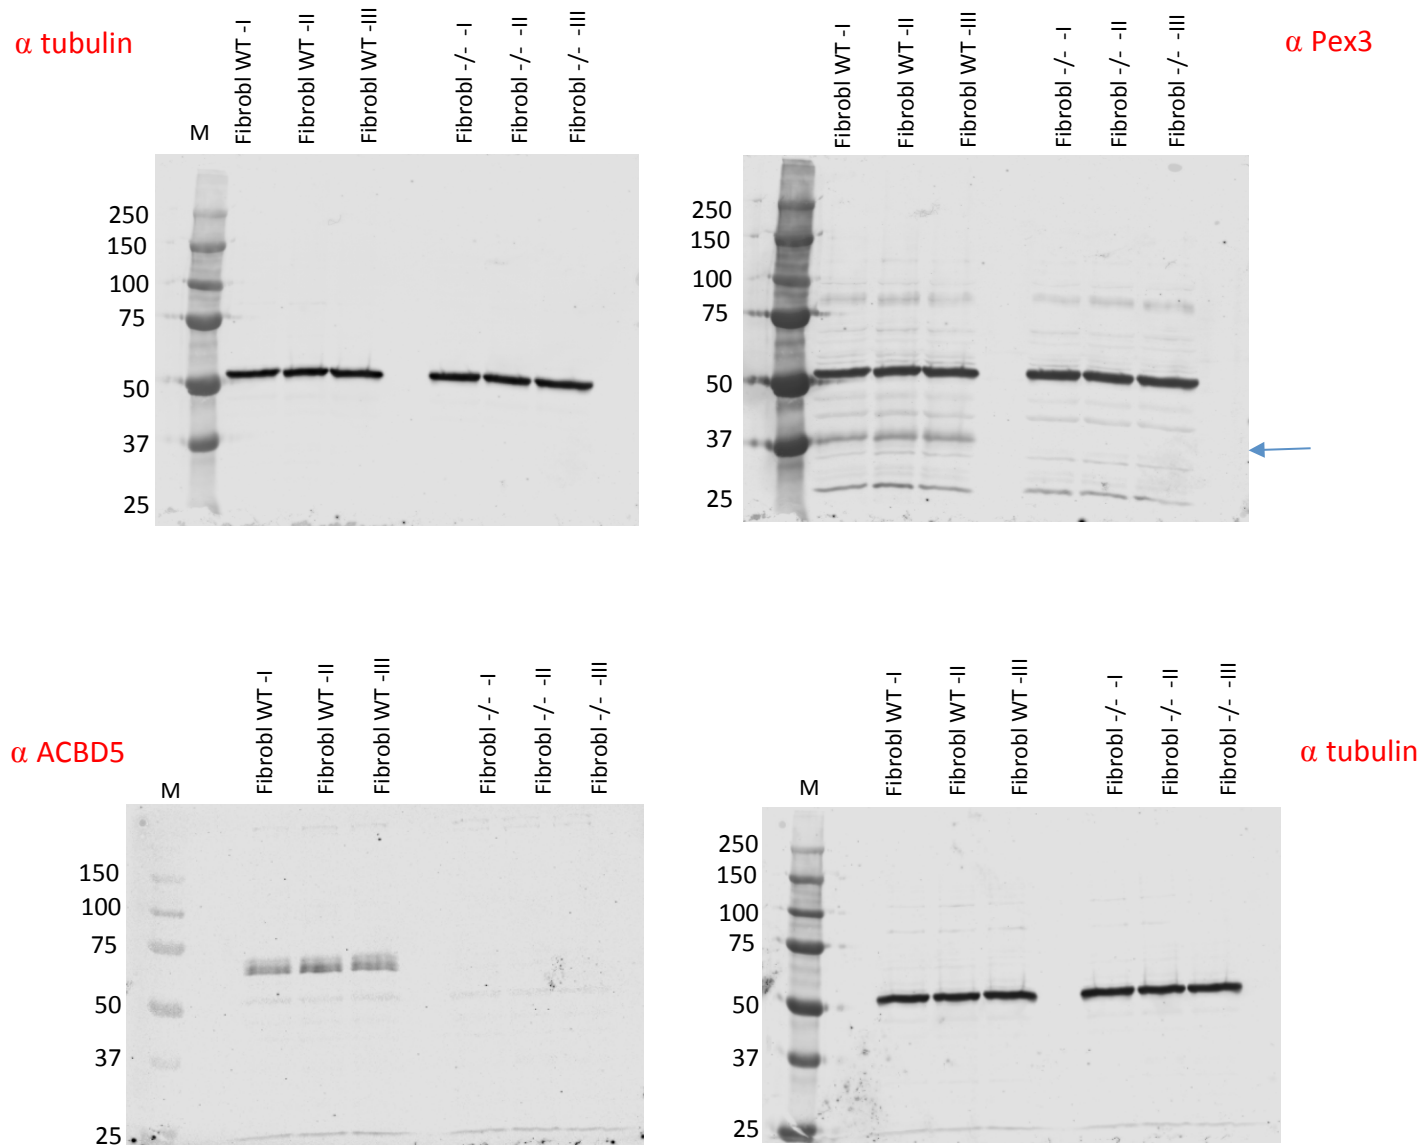

Original blots, Figure 3, c and d  
Molecular mass markers are indicated

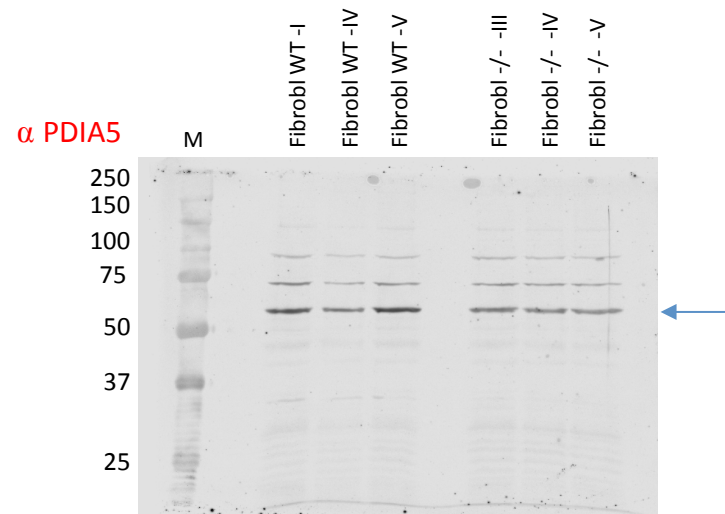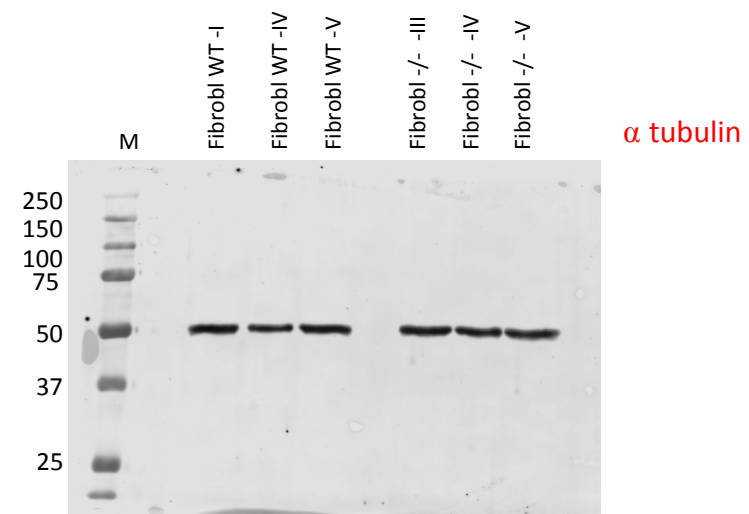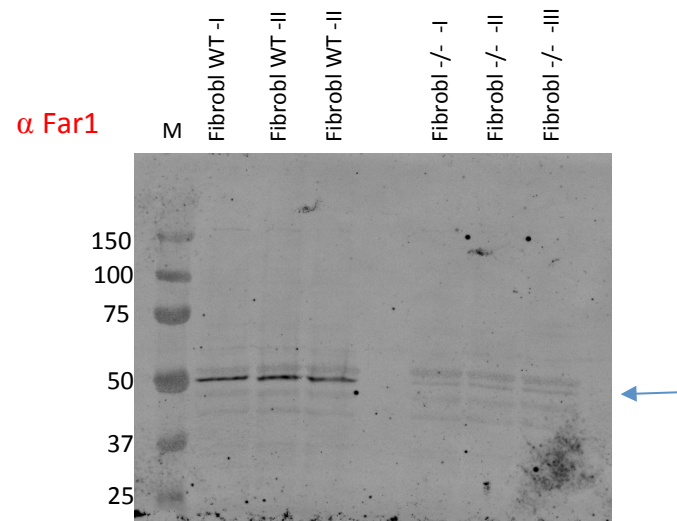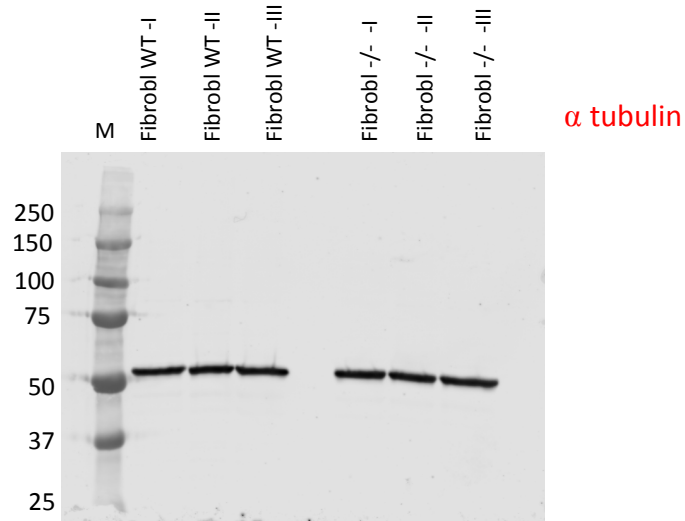

# Original blots, Figure 3, e and f

## Molecular mass markers are indicated

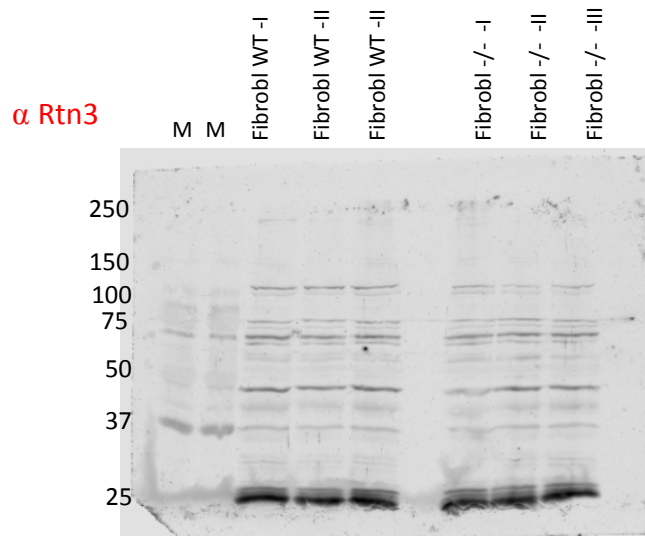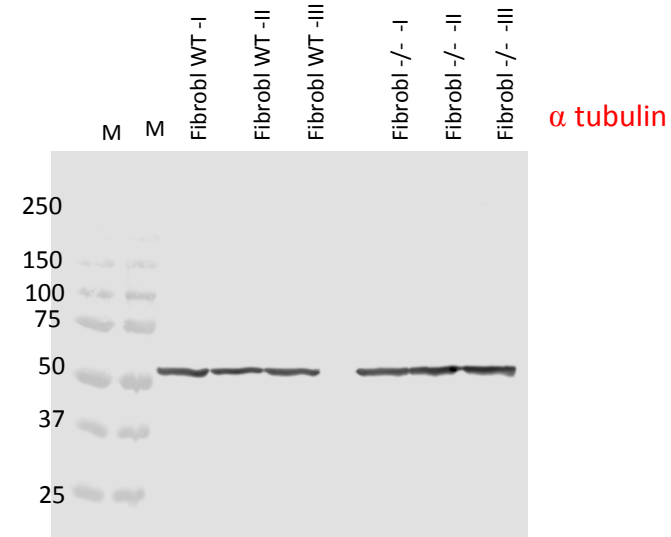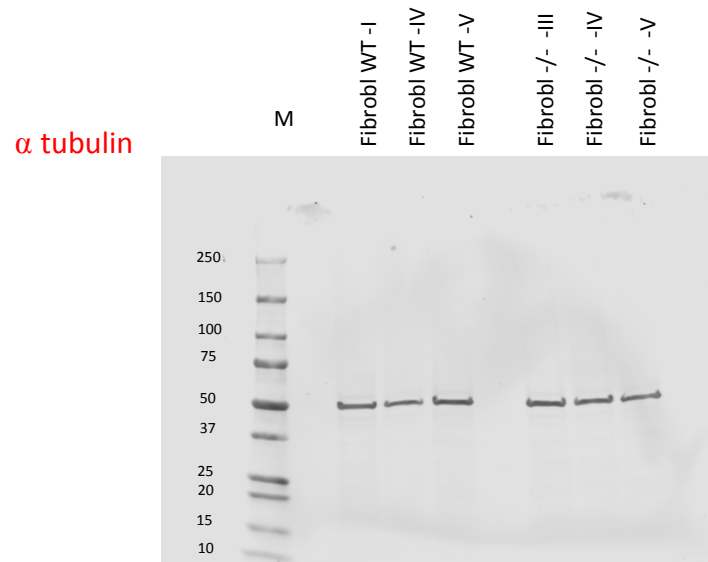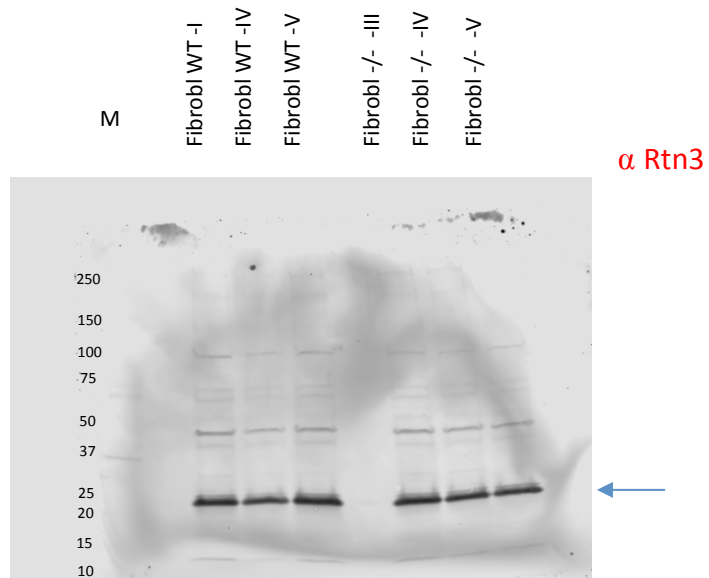

Original blots, Figure S1  
Molecular mass markers are indicated

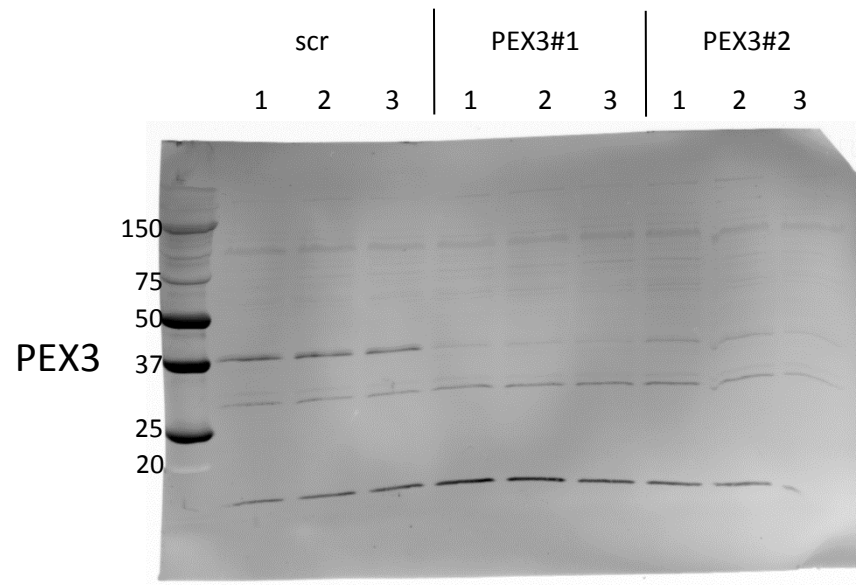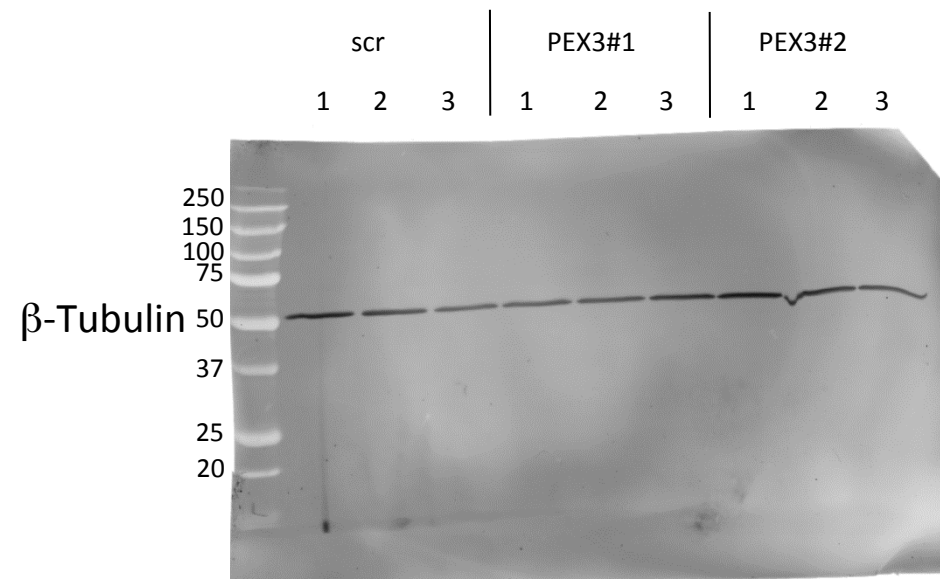

Silencing in HeLas
