# Supplementary material for: Quantitative Proteomics and Differential Protein Abundance Analysis after the Depletion of PEX3 from Human Cells Identifies Additional Aspects of Protein Targeting to the ER
Source: Int J Mol Sci. 2021 Dec 1;22(23):13028. doi: 10.3390/ijms222313028 (PMC8658024; doi:10.3390/ijms222313028)
Supplement: Supplementary file 1 [file ijms-22-13028-s001.zip]

Archive with 10 entries (10 files):
- Figure S1.pdf
- MS blots PEX3.pdf
- PEX3_Description of Supplementary Tables.pdf
- Table S1_pex_3_all.xlsx
- Table S2_pex_3_full_lo.xlsx
- Table S3_pex_3_Zellweger_all.xlsx
- Table S4_pex_3_Zellweger_full_lo.xlsx
- Table S5_pex_3_Zellweger_full_up.xlsx
- Table S6_HeLaZoverlap.xlsx
- Table S7_proteomeXchange_identifiers.pdf
