# Supplementary material for: Quantitative Proteomics and Differential Protein Abundance Analysis after the Depletion of PEX3 from Human Cells Identifies Additional Aspects of Protein Targeting to the ER
Source: Int J Mol Sci. 2021 Dec 1;22(23):13028. doi: 10.3390/ijms222313028 (PMC8658024; doi:10.3390/ijms222313028)
Supplement: Supplementary file 1 [file ijms-22-13028-s001.zip › Table S1_pex_3_all.xlsx]

## Sheet: Sheet 1 - pex_1_all_summary_2
ID	Gene name	Fold change	Neg. log10 p-value 1	Neg. log10 p-value 2
O43924	PDE6D	0.378	0.6077	0.5468
Q6ZVM7	TOM1L2	-0.7663	2.952	2.3597
Q13423	NNT	0.1658	0.4155	0.3369
Q8IYH5	ZZZ3	0.4829	0.9715	1.3488
P04075	ALDOA	0.1744	0.3625	0.7367
Q8WTT2	NOC3L	0.0306	0.1173	0.0648
P19447	ERCC3	-0.058	0.1241	0.1073
Q14181	POLA2	0.2881	0.6448	0.5042
Q6W2J9	BCOR	0.3663	0.3735	0.5416
Q9HAU4	SMURF2	-2.016	2.5293	5.9945
Q9Y6K5	OAS3	-0.2092	0.2579	0.7566
Q86YH6	PDSS2	0.7739	1.6246	0.6669
Q9ULJ8	PPP1R9A	0.0229	0.0352	0.2039
A1KXE4	FAM168B	0.2368	6.0791	1.0493
Q5TCQ9	MAGI3	0.017	0.4995	0.1315
Q15751	HERC1	-0.1133	0.4668	0.1284
Q14254	FLOT2	0.1901	0.503	0.6123
Q8NC51-3	SERBP1	-0.078	0.2296	0.1289
Q9GZP8-2	IMUP	0.0336	0.0225	0.0062
Q8TDZ2	MICAL1	1.403	2.4321	0.6923
Q9HD15	SRA1	-0.0473	0.2205	0.0403
Q9ULC3	RAB23	-0.019	0.4089	0.2616
P60510	PPP4C	-0.1804	0.5475	0.1224
P07951-2	TPM2	-0.3219	1.5747	0.4593
P10619	CTSA	0.0721	0.0676	0.2254
P56545	CTBP2	0.0756	0.52	0.0357
P48507	GCLM	0.0751	0.0142	0.3667
Q96RP9	GFM1	0.1381	0.4686	0.382
Q9HBI1	PARVB	0.3527	0.5506	1.1682
Q8TAA9	VANGL1	-0.0921	0.5204	0.0647
H7BZJ3	PDIA3	-0.1091	0.2541	0.2253
P52179	MYOM1	-0.1494	0.0999	0.5524
Q7Z417	NUFIP2	0.3872	1.8394	0.6432
Q9NW38	FANCL	-0.1108	0.4602	0.205
O96033	MOCS2	-0.4956	0.9371	1.0175
Q9ULU4-12	ZMYND8	-0.1209	0.4515	0.0195
Q9NWZ3	IRAK4	0.0225	0.0011	0.0524
A0JLT2	MED19	-2.0473	0.4536	1.5442
P27694	RPA1	0.016	0.3171	0.1654
P78356	PIP4K2B	-0.2979	1.0399	0.9017
P10243	MYBL1	-0.0616	0.4702	0.0382
Q9ULG1	INO80	0.5451	1.3247	1.1055
Q8N5G2	TMEM57	0.0671	0.2813	0.2726
Q6DKK2	TTC19	0.2011	0.4455	0.2183
Q9UBX3	SLC25A10	0.3801	0.6613	0.8914
Q8N108	MIER1	-0.1729	0.2972	0.2565
Q96T37	RBM15	-0.0234	0.2285	0.3159
Q5HYZ1		-0.3547	0.3972	0.0107
Q2TAY7	SMU1	0.0775	0.136	0.1721
P49006	MARCKSL1	-0.0608	0.0001	0.2398
O43837	IDH3B	0.0724	0.1531	0.4731
Q96TA1	FAM129B	0.0055	0.0472	0.0105
Q8IVD9	NUDCD3	-0.3477	0.9373	0.9469
Q05519	SRSF11	0.045	0.1965	0.0777
Q92817	EVPL	-0.3014	0.2265	0.6287
P43034	PAFAH1B1	0.0644	0.2069	0.1051
P48729	CSNK1A1;CSNK1A1L	-0.3013	0.4108	0.454
O00462	MANBA	0.2867	0.0945	1.3097
O14807	MRAS	0.4185	1.0785	0.9468
K7ENL9	C18orf8	-0.4757	0.4431	1.32
Q96IK1	BOD1	0.3196	0.4963	0.8804
P08473	MME	0.1868	0.6774	0.436
Q9HC62	SENP2	0.0843	0.2041	0.4597
Q68CZ2	TNS3	0.0302	0.2646	0.0075
Q6DKJ4	NXN	-0.3322	0.8693	0.7228
Q15746	MYLK	-0.2201	0.3534	0.0351
O00255	MEN1	0.2311	0.2454	0.5104
O43678	NDUFA2	0.6481	1.6868	0.6564
Q9NX05	FAM120C	-0.5877	7.7748	0.5658
Q9H7Z6	KAT8	0.607	1.6436	1.2702
Q92833	JARID2	0.1469	0.0149	0.6138
C9JBI6	ZNF638	0.4082	0.1252	0.4579
Q15910	EZH2	-0.3432	0.1766	0.7361
Q92541	RTF1	0.3383	1.0219	1.4826
O60504	SORBS3	-0.4459	0.7565	0.9117
Q13671	RIN1	-0.8199	0.7609	0.6984
O15156	ZBTB7B	-0.0738	0.4982	2.0312
Q15061	WDR43	-0.1318	0.741	0.0137
O75821	EIF3G	0.1966	0.7363	0.7393
P63313	TMSB10	-0.0058	0.0284	0.0249
P13612	ITGA4	-0.534	1.0767	1.1054
Q13416	ORC2	0.017	0.2103	0.1419
Q96FZ7	CHMP6	-0.0907	0.5658	0.6735
Q969S9	GFM2	-0.1169	0.3429	0.1211
O15392	BIRC5	0.5835	1.0845	1.2392
P47985	UQCRFS1;UQCRFS1P1	-0.2898	0.7158	0.3454
Q96I59	NARS2	0.1421	0.7378	0.0495
O43676	NDUFB3	-0.0154	0.0034	0.0397
O75828	CBR3	-0.3485	0.3385	1.0901
P67812	SEC11A	-0.033	0.1493	0.0459
E9PFB9	CCDC18	0.6738	1.0808	1.8613
C9J7L0	RBBP7	-3.2441	1.4892	1.1561
Q9BTE1	DCTN5	0.5081	0.8664	0.6224
Q2TBE0	CWF19L2	0.1814	0.0219	0.6365
Q8TCU4	ALMS1	-0.6079	1.0823	0.341
Q9NRG0	CHRAC1	0.4617	1.8162	0.8562
Q96A65	EXOC4	-0.2175	0.6775	0.3529
P50570	DNM2	-0.0196	0.0033	0.1072
Q9H267	VPS33B	-0.0206	0.1054	0.1723
Q9BYD1	MRPL13	0.2069	0.371	0.5262
O94880	PHF14	-0.3488	0.6901	0.0084
Q8NFH3	NUP43	-0.5624	0.1634	0.2432
P56962	STX17	0.4118	0.4496	0.9398
Q8IY21	DDX60	-0.3644	0.5045	1.1748
O75822	EIF3J	-0.3374	0.3773	0.5787
Q9NUP1	BLOC1S4	0.1445	0.3542	0.9991
Q9UQ13	SHOC2	-0.0573	0.0438	0.2986
P53701	HCCS	-0.0255	0.01	0.0492
O96011	PEX11B	0.5746	1.2539	1.9898
P42766	RPL35	-0.1114	0.7102	0.0497
G3V3G9	DCAF8	0.3447	0.9652	0.7425
Q9UKW4-3	VAV3	0.59	3.6922	0.4039
P49585	PCYT1A	-0.2785	0.5591	0.5322
Q96B26	EXOSC8	-0.0097	0.067	0.0204
P54577	YARS	0.1882	0.3864	0.6174
Q9BVS5	TRMT61B	0.3542	0.9046	0.6308
Q8IZP0	ABI1	-0.2363	1.1689	0.1039
Q13200	PSMD2	-0.3018	1.1663	1.0898
P48444	ARCN1	0.0326	0.0573	0.1566
Q9UJ68	MSRA	-0.5499	1.5541	1.2872
F5H0B0		-0.1221	0.2104	0.389
Q04725	TLE2	0.1353	0.4409	0.2211
Q9ULL5-3	PRR12	0.2428	0.3145	0.4624
Q6ZRV2	FAM83H	0.9433	1.1491	2.499
Q92526	CCT6B	1.4137	1.9931	3.2286
Q15717	ELAVL1	-0.0153	0.0014	0.0686
P05141	SLC25A5	0.2167	0.3928	0.7101
Q96GY0	ZC2HC1A	0.2248	0.8561	0.6087
H7C2F2	CD99	0.2298	1.7364	0.1783
P14868	DARS	-0.1313	0.1855	0.4016
Q8WVY7	UBLCP1	0.1691	0.1945	0.5834
P54725	RAD23A	0.3377	0.3682	0.4533
Q9BRJ2	MRPL45	0.0437	0.7727	0.3514
O76075	DFFB	0.5244	0.4347	1.6129
Q9UNH6	SNX7	-0.0907	0.052	0.259
P55072	VCP	-0.0809	0.5008	0.0966
O95801	TTC4	-1.1121	1.7915	3.9226
O94855	SEC24D	-0.2516	0.6302	0.4449
Q6ZV73	FGD6	0.7581	2.3647	1.7135
Q01970	PLCB3	-0.1373	0.1322	0.1745
Q99757	TXN2	0.5027	1.4393	0.6536
Q5BKY9	FAM133B;FAM133A	0.6058	2.9823	1.1959
P00519	ABL1	0.5292	1.0687	0.7436
Q16134	ETFDH	0.4086	1.1037	1.1229
P30040	ERP29	0.0942	0.3505	0.1391
P16383	GCFC2	0.0242	0.0939	0.0688
Q6P1M0	SLC27A4	-0.0143	0.1326	0.0153
P46379	BAG6	0.246	0.7136	0.6488
Q8TEY7	USP33	-0.134	0.2889	0.1143
Q13151	HNRNPA0	-0.0354	0.0157	0.0819
Q00688	FKBP3	0.0384	0.2704	0.0115
Q8NG31	CASC5	0.174	0.884	0.1225
Q49A26	GLYR1	0.1505	0.2629	0.5174
Q99574	SERPINI1	-0.4646	2.2478	1.0201
O95456	PSMG1	0.1006	0.2399	0.2218
Q13347	EIF3I	-0.0081	0.2784	0.2096
Q96CN7	ISOC1	0.2464	1.3613	0.1174
Q13572	ITPK1	-0.7392	1.8498	0.9156
Q14241	TCEB3	0.5125	1.5347	1.093
Q15059	BRD3	-0.2094	0.5388	0.4892
Q8N5N7	MRPL50	-0.0522	0.1076	0.0568
P17275	JUNB	0.0293	0.3145	0.0847
Q9ULI0	ATAD2B	-0.2159	1.57	0.4599
Q8NHQ8	RASSF8	0.1867	0.3556	0.9977
P19793	RXRA	-0.0257	0.1881	0.0809
P31749	AKT1	0.0442	0.7339	0.3408
O75116	ROCK2	0.0067	0.1073	0.0143
P48163	ME1	0.0319	0.3315	0.4434
Q92621	NUP205	-0.0359	0.2626	0.0122
P53582	METAP1	0.515	0.936	0.7682
P98155	VLDLR	0.2062	0.4628	0.3283
Q9P2B7	CFAP97	0.3931	0.2958	1.0903
O95625	ZBTB11	0.4075	0.343	0.959
P04818	TYMS	0.0381	0.0865	0.2369
Q9UJV9	DDX41	0.0441	0.1871	0.1866
P07355	ANXA2;ANXA2P2	-0.0467	0.1626	0.1332
P35250	RFC2	-0.035	0.2739	0.0001
Q96C90	PPP1R14B	-0.9262	2.982	5.2911
Q15365	PCBP1	0.0616	0.064	0.3416
O75781-2	PALM	0.0907	0.0981	0.2121
Q13228	SELENBP1	-0.1305	0.2315	0.6349
Q13153	PAK1	0.751	1.4639	1.3403
Q8NBU5	ATAD1	0.1385	0.4864	0.2807
Q9UQE7	SMC3	0.1327	0.6063	0.4386
Q99623	PHB2	-0.2802	0.6333	1.4704
Q9Y530	OARD1	-0.6516	1.8313	0.8713
P47756-2	CAPZB	0.0126	0.1178	0.0084
P43304	GPD2	-0.1498	0.3736	0.2798
P98170	XIAP	0.3951	1.5162	0.6347
O43390	HNRNPR	0.1144	0.4175	0.3812
Q8N4C8	MINK1	-0.7358	1.4563	1.3154
Q5W0Z9	ZDHHC20	-0.2071	0.1856	0.0436
P08962	CD63	-0.4551	0.2802	1.421
Q9UBK9	UXT	0.4074	0.5358	2.0966
Q9NRV9	HEBP1	-0.1986	0.9305	0.2446
P04150	NR3C1	0.153	0.2134	0.6377
Q8N1F7	NUP93	-0.057	0.1675	0.0787
Q8TEK3	DOT1L	-0.3085	0.5406	0.8499
Q8TED0	UTP15	0.0587	0.0395	0.3435
Q9Y3Z3	SAMHD1	0.1282	0.1714	0.3613
Q86Y37	CACUL1	0.0644	0.6111	0.7779
Q9NYF8-3	BCLAF1	-0.4315	0.1049	0.2917
O00571	DDX3X	-0.1082	0.2282	0.2695
P62942	FKBP1A;FKBP12-Exip2	0.3211	1.1275	0.3136
Q15527	SURF2	-0.5022	0.5095	1.5545
Q969H8	MYDGF	0.2218	0.0057	1.0763
Q9C0I1	MTMR12	-0.0228	0.1562	0.0429
O14641	DVL2	0.5101	1.2481	2.101
Q9Y5B9	SUPT16H	0.005	0.0606	0.0113
Q8N392	ARHGAP18	-0.0853	0.1105	0.4015
H7BXI1	ESYT2	0.0696	0.0261	0.285
O15541	RNF113A	-0.1038	0.5066	0.0075
Q9UHI6	DDX20	-0.0049	0.1062	0.0191
Q5JUR7	TEX30	-0.0207	0.0388	0.0457
Q70UQ0	IKBIP	-0.2425	1.648	0.0237
P61981	YWHAG	0.002	0.0658	0.0751
Q9H0E9	BRD8	0.1885	1.7331	2.5188
Q96EP5	DAZAP1	0.1234	0.1823	0.3922
Q9BZK7	TBL1XR1	0.0053	0.0008	0.0456
P00813	ADA	0.119	0.206	0.3552
Q15819	UBE2V2	0.2693	0.8787	0.7321
Q9P2B4	CTTNBP2NL	-0.0262	0.1989	0.1199
P51159	RAB27A	0.1946	0.4365	0.4855
Q9NRX1	PNO1	-0.5476	1.2972	1.435
Q5RI15	COX20	-0.1047	0.2084	0.1817
Q96QU8	XPO6	0.0516	0.0756	0.3916
Q8IZ07	ANKRD13A	-1.205	3.1212	1.7738
Q14376	GALE	-0.1578	0.1907	0.2573
Q6NTE8	C5orf45;METTL6;TBC1D19	-0.4729	0.5997	1.8719
Q9NRZ7	AGPAT3	0.0949	0.3421	0.7134
O95104	SCAF4	0.2248	1.0717	0.4614
Q8N2K1-3	UBE2J2	-0.4441	0.2811	0.1645
Q9UL15	BAG5	0.1794	0.4187	0.3733
Q96LB3	IFT74	-0.5822	0.7243	0.4127
Q15119	PDK2	-0.3189	0.6123	0.1786
Q9HCP0	CSNK1G1	0.4082	0.8551	0.5209
O15056	SYNJ2	0.4721	1.4966	0.3439
O15160	POLR1C	-0.4731	0.6116	0.7553
P33316-2	DUT	0.1171	0.6225	0.0485
Q16762	TST	0.18	0.2272	0.9044
Q8WYP5	AHCTF1	0.2148	0.479	1.1034
Q9NUQ2	AGPAT5	-0.0505	0.0859	0.1649
Q8N612	FAM160A2	0.1603	0.0085	0.4436
Q9HCN4	GPN1	0.0866	0.2311	0.5984
P23528	CFL1	0.2854	0.9764	0.5128
P02794	FTH1	0.1063	0.0031	0.3037
Q9BYG5	PARD6B	0.0204	0.0407	0.3404
Q08345	DDR1	0.5982	0.7828	0.0904
Q9NWK9	ZNHIT6	0.6328	4.4162	0.6753
P30419	NMT1	0.0887	0.5339	0.0584
O00268	TAF4	0.4545	1.2203	1.0318
Q69YH5	CDCA2	0.1355	0.0182	0.4337
P28702	RXRB	-0.0911	0.4536	0.158
Q9Y5E6	PCDHB3	-0.1927	0.3232	0.2494
Q9NYJ8	TAB2	-2.4366	2.5666	5.7829
P50552	VASP	0	0.28	0.1761
Q9H9Y2	RPF1	-0.453	0.2465	0.2813
P49902	NT5C2	0.0204	0.0271	0.1793
Q92882	OSTF1	-0.0025	0.3356	0.2665
Q9Y657	SPIN1	-0.0905	0.1696	0.2435
Q9UNL2	SSR3	0.2384	0.2345	0.3626
Q9Y5Q8	GTF3C5	-0.1321	0.3301	0.1262
Q9UBH6	XPR1	-0.0201	0.6007	0.4781
Q9H410	DSN1	0.0751	0.1326	0.2026
Q13310	PABPC4	0.0605	0.3802	0.0431
Q9H0U9	TSPYL1	-0.3215	0.1182	0.4252
P68431	HIST1H3A	0.2039	0.6195	0.3065
Q969V5	MUL1	0.0617	0.0513	0.275
Q96NB3	ZNF830	0.3774	0.6018	1.5136
P06576	ATP5B	0.0286	0.0812	0.0905
Q9NP66	HMG20A	-0.1378	0.3657	0.1958
Q99442	SEC62	-0.4469	1.2995	0.4161
P61916	NPC2	0.1904	0.4897	0.445
Q14573	ITPR3	0.0512	0.0148	0.2593
Q96D15	RCN3	-0.0769	0.0315	0.073
Q16555	DPYSL2	-0.1643	1.5104	0.2102
Q6ICC9	LDOC1L	-0.5726	0.6424	0.8203
P78549	NTHL1	0.0416	0.0541	0.1382
Q12948	FOXC1	1.097	7.5041	3.5845
Q13823	GNL2	-0.0551	0.2484	0.0732
P07384	CAPN1	-0.0982	0.4672	0.0357
Q99519	NEU1	0.0221	0.3404	0.1039
Q9Y3T9	NOC2L	0.364	1.4687	0.5511
P19388	POLR2E	0.2333	0.3078	1.0426
Q9UKU7	ACAD8	0.2271	2.2592	0.1504
Q9NRY4	ARHGAP35	0.2266	1.4711	0.379
Q9NTJ3	SMC4	0.0599	0.1787	0.2095
P31431	SDC4	0.066	0.9522	0.1195
P50583	NUDT2	-0.1685	0.2473	0.2411
Q9NQT5	EXOSC3	-0.0573	0.137	0.1793
P20226	TBP;TBPL2	0.3678	0.8666	0.5173
Q9UJ41	RABGEF1	0.1265	0.2041	0.7403
P39748	FEN1	0.0896	0.3942	0.1143
Q86W92-4	PPFIBP1	0.0667	0.1822	0.172
Q02790	FKBP4	-0.0199	0.4007	0.1674
Q9NYV6	RRN3	-0.1153	0.1284	0.1254
Q9NWZ8	GEMIN8	0.2124	0.6804	0.173
Q9P0M9	MRPL27	1.2104	1.7126	5.3686
P49815	TSC2	0.3673	0.9433	0.9103
P43353	ALDH3B1	0.429	1.0258	0.5215
O94955	RHOBTB3	-0.4098	2.5455	0.1612
Q16644	MAPKAPK3	0.442	1.7412	0.8293
Q86W34	AMZ2	0.2795	1.5246	0.3632
P35520	CBS	0.1696	0.4439	0.7527
Q01167	FOXK2	0.3884	0.9173	1.1321
C9J2V2	IKBKG	-0.3641	1.0069	3.0601
Q6VY07	PACS1	-0.0875	0.6246	0.0005
Q96GX5	MASTL	-0.3173	0.0315	0.5536
O95749	GGPS1	-0.0125	0.1576	0.0586
Q96JJ7	TMX3	0.0508	0.3398	0.0623
P23284	PPIB	0.1129	0.3779	0.2691
O43395	PRPF3	0.0716	0.0421	0.288
Q8TCF1	ZFAND1	0.2685	1.512	0.3302
Q7Z3J2	C16orf62	0.0002	0.2208	0.1516
Q5VZF2	MBNL2;MBLL	0.4607	0.8654	1.1099
P48681	NES	-0.0383	0.7491	0.2167
Q86UP2	KTN1	0.1493	0.5845	0.3876
Q9NVH1	DNAJC11	-0.3962	2.1999	0.8237
Q7L5Y9	MAEA	0.032	0.3771	0.1572
O60493	SNX3	0.0636	0.3158	0.0734
Q9BY44	EIF2A	0.1705	0.8233	0.4612
Q9P0U3	SENP1	-0.2488	0.0585	0.8931
Q6RFH5	WDR74	0.0389	0.1734	0.0602
O75925	PIAS1	0.331	0.5728	0.5606
Q9HCD5	NCOA5	-1.0373	0.3577	1.1212
Q9BTY7	HGH1	-1.2714	1.1152	2.2863
O43913	ORC5	-0.0667	0.1292	0.3434
P63241	EIF5A;EIF5AL1	-0.051	0.2394	0.0252
Q13144	EIF2B5	0.2571	0.588	0.5302
Q9UFW8	CGGBP1	0.737	2.0685	0.8806
P22694	PRKACB	-0.1477	0.1253	0.0257
P13196	ALAS1	-0.4203	1.79	0.0614
Q9H981	ACTR8	-0.5288	0.3102	0.1667
Q9UI42	CPA4	-0.3341	0.0875	0.5024
P49589-3	CARS	0.1335	0.0829	0.4877
P18124	RPL7	0.0406	0.0974	0.1117
Q6UWW8	CES3	-0.0411	3.2601	1.8562
Q92845	KIFAP3	0.4471	2.4872	0.2894
Q86UY8	NT5DC3	-0.5186	0.2095	1.6142
P12109	COL6A1	-0.134	0.3929	1.0108
Q9Y2S0	POLR1D	-0.1568	0.1555	0.2625
Q8N3U4-2	STAG2	-0.0599	0.2712	0.0448
O15213	WDR46	-0.0584	0.5607	0.0356
P05067	APP	0.1502	0.2471	0.5391
Q9UKI8-2	TLK1	0.51	0.226	3.2565
Q6P996	PDXDC1	0.0079	0.2957	0.2586
Q16204	CCDC6	-0.0072	0.0455	0.0585
Q9Y605	MRFAP1	0.0404	0.5503	0.1352
Q9H496	TOR1AIP2	0.1114	0.707	0.9703
P12757	SKIL	0.3128	1.416	0.157
Q9BV73	CEP250	-0.3654	0.7237	0.1252
Q9BUA3	C11orf84	-0.1865	0.0725	0.4934
Q9Y371	SH3GLB1	-0.0387	0.5123	0.1923
Q96CT7	CCDC124	-0.3739	0.878	1.612
Q00325-2	SLC25A3	-0.1389	0.48	0.253
Q49AR2	C5orf22	-0.1505	0.1726	0.1114
O95503	CBX6	-1.5886	4.1321	4.7909
P57088	TMEM33	-1.468	0.4779	0.1307
Q8NDM7	CFAP43	-0.8072	1.2574	0.3487
Q9Y4C2	TCAF1	0.2538	0.448	0.7476
Q9Y6I9	TEX264	0.2081	0.4391	0.6466
Q99704	DOK1	-0.1025	0.203	0.0348
P23588	EIF4B	-0.006	0.0507	0.0416
P20338	RAB4A	0.2442	0.4292	0.7966
Q9UGM6	WARS2	-0.1401	0.6991	0.9518
Q9H2H9	SLC38A1	0.4198	0.8249	0.6975
Q9NZM5	GLTSCR2	0.5106	1.5935	2.2298
O14786	NRP1	-1.6284	3.2424	2.7899
Q8IWU2	LMTK2	-0.2296	0.9317	0.1473
O15269	SPTLC1	-0.104	0.1206	0.2236
Q92685	ALG3	-0.1601	1.0037	0.0302
Q15121	PEA15	-0.3906	1.6107	0.6137
P42575	CASP2	0.1891	1.2595	0.0039
Q8IU85	CAMK1D	-0.0265	0.0497	0.0664
Q13371	PDCL	0.174	0.0707	0.6008
Q4G0F5	VPS26B	0.2021	0.6888	0.2485
Q8WVV9	HNRNPLL;HNRPLL	-0.4184	1.7852	1.0936
Q9Y314	NOSIP	-0.338	1.5365	0.8806
Q8IZL8	PELP1	-0.2744	0.0729	0.2975
O75379	VAMP4	-0.9751	3.3193	5.098
Q14980-2	NUMA1	-0.1132	0.3516	0.0339
Q9NZJ9	NUDT4	-0.4886	1.9429	0.0666
Q9H2J4	PDCL3	-0.0066	0.1503	0.1753
Q8NFG4	FLCN	0.1808	0.8754	0.0494
Q9Y5Q0	FADS3	-0.1059	0.3567	0.237
Q86W56	PARG	0.1315	1.2244	0.033
O14744	PRMT5	0.0985	0.179	0.2092
Q13045-2	FLII	-0.6592	0.5011	1.0909
Q96PU5	NEDD4L	-0.4409	0.4218	1.3191
Q13561	DCTN2	0.111	0.0782	0.6203
P55212	CASP6	0.5606	1.2162	0.8574
Q9NP77	SSU72	0.0854	0.063	0.3432
Q9NXE4	SMPD4	0.2543	0.7984	0.6655
Q5VUM1	SDHAF4	-0.7237	1.8148	1.6445
Q9H0A0	NAT10	-0.0922	0.1749	0.2419
P61020	RAB5B	-0.4538	1.5812	0.957
P30533	LRPAP1	-0.1793	0.8161	0.4746
Q04721	NOTCH2	0.2377	0.8018	0.0086
Q9BRT2	UQCC2	0.0268	0.2803	0.0104
Q9UDY4	DNAJB4	-0.1389	0.1025	0.4697
Q9NRY5	FAM114A2	0.3331	2.1617	0.5241
Q92538	GBF1	0.1239	0.2537	0.2826
Q16629	SRSF7	-0.2326	0.0832	0.223
P28070	PSMB4	-0.0507	0.039	0.0325
P52848	NDST1	0.5912	0.9757	0.7455
Q96CM8	ACSF2	0.0709	0.0635	0.3554
Q9NRH1	YAE1D1	-1.1975	1.1027	1.0327
O00311	CDC7	0.0756	0.4826	0.0187
Q00013	MPP1	0.09	0.0771	0.3452
Q7L5A8	FA2H	0.4933	0.7667	1.1956
Q6ZMI0	PPP1R21	0.541	2.7707	0.743
Q9P2L0	WDR35	-0.8868	1.4743	2.6388
Q8NCF5	NFATC2IP	-0.1489	0.2935	0.6166
Q9NPQ8	RIC8A	0.1314	0.0508	0.6828
Q2M2I8	AAK1	0.0766	0.6042	0.4718
Q2M389	KIAA1033	0.1261	0.3824	0.1773
Q99541	PLIN2	0.1342	0.1601	0.1127
P05423	POLR3D	0.1888	1.0102	0.0284
P00403	MT-CO2	-0.3007	0.0993	0.3891
P60174	TPI1	0.0946	0.5792	0.1016
P27487	DPP4	0.6197	2.2622	0.8134
P68366	TUBA4A	0.1338	0.6959	0.0236
Q9Y606	PUS1	0.0761	0.1919	0.2026
P08729	KRT7	-0.0337	0.3927	0.0878
O75955	FLOT1	0.0164	0.1967	0.2218
P51668	UBE2D1;UBE2D4	0.2066	1.3395	0.1003
H3BLZ8	DDX17	0.0094	0.0024	0.0613
Q96BQ5	CCDC127	0.0034	0.2365	0.1761
Q8WU10	PYROXD1	0.1859	0.6914	0.0933
P00491	PNP	-0.0783	0.0316	0.0509
Q8NEY8-2	PPHLN1	0.2858	0.3806	0.525
P36405	3	-0.0192	0.2255	0.1873
Q92828	CORO2A	-0.1998	1.0877	0.3554
P29083	GTF2E1	0.1991	0.0665	0.7626
Q9NZ01	TECR	0.0963	0.0739	0.3615
Q96HC4	PDLIM5	-0.1482	0.5189	0.4495
Q9NUL3	STAU2	-0.2524	0.7596	0.1093
Q9UK41	VPS28	-0.0359	0.2399	0.069
Q8NBN7	RDH13	-0.4788	0.8671	0.8294
Q9GZP9	DERL2	-0.2989	0.0165	1.4222
P04350	TUBB4A	-0.0009	0.4372	0.1024
P17535	JUND	0.136	0.0131	0.4043
O76003	GLRX3	0.1104	0.2706	0.24
Q9GZT3	SLIRP	-0.2831	0.1667	0.9657
Q99956	DUSP9	-0.3626	2.2699	0.1093
Q96H20	SNF8	-0.3247	0.4644	1.2402
O75911	DHRS3	0.1724	0.251	0.8974
F8W6A4	KLHDC3	0.0249	0.2814	0.048
Q96PC3	AP1S3	0.1338	0.0408	0.7137
Q15653	NFKBIB	0.1263	0.1817	0.2944
P29372	MPG	-0.2958	0.2399	1.3872
Q16527	CSRP2	-0.0398	0.5132	0.2679
Q8WTV0-2	SCARB1	-0.189	0.2534	0.7816
P48553	TRAPPC10	-0.0624	0.0023	0.1377
P61758	VBP1	0.0741	0.3074	0.0571
E9PF32	DENND3	0.5229	3.4165	0.2724
Q9Y217	MTMR6	0.0179	0.183	0.0136
Q9P0L2	MARK1	0.21	0.6509	0.0931
O95613	PCNT	-0.2099	0.3028	0.0508
Q969Z0	TBRG4	-0.0912	0.133	0.3274
Q9UBT7	CTNNAL1	0.2935	0.6017	0.7911
Q9NX24	NHP2	0.2094	0.615	0.239
Q86TB9	PATL1	0.011	0.2578	0.1335
Q96E29	MTERF3	-0.1313	0.4098	0.2731
O95363	FARS2	-0.5047	0.3242	0.1211
Q9Y3U8	RPL36	-0.1276	0.0025	0.0714
P60604	UBE2G2	-0.688	1.0223	0.3195
P16591	FER	0.3698	0.7028	0.585
P05026	ATP1B1	-0.3255	1.2293	0.3979
Q7L1W4	LRRC8D	0.2759	0.5534	0.5112
Q8N1G2	CMTR1	0.1339	0.5168	0.0778
Q13057	COASY	-0.4028	2.2583	0.837
Q9H4L7	SMARCAD1	0.3539	1.6357	0.6282
Q15024	EXOSC7	0.1867	0.2385	0.5435
P08865	RPSA;RPSAP58	-0.1834	0.5202	0.5681
Q9UL03	INTS6	0.1932	0.0089	0.9269
Q99543	DNAJC2	-0.0629	0.1113	0.0142
Q5JPI3	C3orf38	0.5824	1.3449	1.0838
Q92598	HSPH1	-0.0367	0.0595	0.0972
Q08ER8	ZNF543	0.2973	1.3446	0.7673
Q86WR7	PROSER2	0.9647	0.7425	2.4838
O75683	SURF6	-0.0635	0.3007	0.1297
O75844	ZMPSTE24	-0.3903	2.969	0.595
P07942	LAMB1	0.2319	0.7998	0.6428
O15031	PLXNB2	0.1293	0.3545	0.3776
P36507	MAP2K2	-0.2214	0.6628	0.4869
Q32P44	EML3	0.3341	0.7659	0.3802
Q15459	SF3A1	0.0224	0.0116	0.1199
Q9NS39	ADARB2	-0.0534	0.4004	0.0953
O75531	BANF1	-0.2024	0.012	0.0775
O15067	PFAS	-0.068	0.1233	0.1972
Q92688	ANP32B	0.0752	0.0611	0.3528
Q8IXK0	PHC2	-0.052	0.2568	0.0339
P61586	RHOA	0.2468	0.6911	0.4086
Q7L4E1	FAM73B	-0.2651	0.1229	0.066
Q06210	GFPT1	-0.3023	1.2167	0.4683
Q99832	CCT7	0.0669	0.1451	0.1685
Q5VTL8	PRPF38B	0.1162	0.4739	0.0455
Q9NPD3	EXOSC4	-0.129	0.3885	0.0803
P50452	SERPINB8	0.1381	0.223	0.2829
Q15907	RAB11B	0.0905	0.3959	0.1383
P63172	DYNLT1	0.597	0.9111	2.105
Q15773	2	-0.0607	0.4643	0.0454
Q86WA6	BPHL	-0.1353	0.1248	0.2671
Q9NX57	RAB20	0.4026	0.2028	1.1619
A2RRP1	NBAS	0.0076	0.3075	0.2783
P49642	PRIM1	0.1105	0.4826	0.0987
Q9Y6B7	AP4B1	-0.9704	1.983	1.1711
O60762	DPM1	0.2172	0.2462	0.6174
O75380	NDUFS6	0.5007	1.301	0.9678
O43488	AKR7A2	-1.0942	1.0136	1.1702
Q9UBB5	MBD2	-0.2155	1.1842	0.2131
Q9NVM4	PRMT7	-0.2534	1.6108	0.3186
O75165	DNAJC13	0.1283	0.2087	0.2757
P61201	COPS2	0.2402	0.7397	0.5174
Q9NWH9	SLTM	-0.0819	0.5457	0.1575
Q9NUX5	POT1	0.7135	3.853	1.1931
O75190-2	DNAJB6	0.3458	0.431	0.3977
Q13642-5	FHL1	1.8851	3.8229	3.105
P02511	CRYAB	0.6909	1.3608	1.5104
Q9H867	VCPKMT	-0.1913	0.134	1.2616
Q8TAD8	SNIP1	-0.0275	1.7407	1.0353
Q14119	VEZF1	0.8553	1.2456	1.4622
E9PEB9	DST	0.0064	0.1797	0.1566
Q9UNE7	STUB1	-0.196	0.8742	0.2725
P61927	RPL37	-0.1935	0.2049	0.1455
P16949	STMN1	0.4843	0.344	0.8583
Q96C36	PYCR2	0.2472	0.5226	1.1989
Q96G23	CERS2	-0.7902	1.2021	0.8802
Q8N556	AFAP1	0.5225	1.3032	1.0156
Q9H3H1	TRIT1	-0.0746	0.155	0.1224
O95229	ZWINT	-0.2767	0.0811	0.2113
P67775	PPP2CA	-0.4599	1.1746	1.6545
Q9BW83	IFT27	0.4865	1.7045	0.6651
P49754	VPS41	-0.0101	0.2577	0.1226
Q14592	ZNF460	-0.0462	1.0089	1.1686
P80217	IFI35	-0.3197	0.8788	0.8451
Q8TDX7	NEK7	-0.069	0.3627	0.0399
O76021	RSL1D1	0.0971	0.5277	0.0959
O00217	NDUFS8	0.1109	0.3097	0.1551
Q9UIV1	CNOT7	-0.9748	0.9769	0.4843
Q15648	MED1	0.078	0.6787	0.9096
Q9NVA2	SEPT11	-0.1005	0.5559	0.0195
Q9BX66	SORBS1	0.251	0.578	0.3352
Q96EY8	MMAB	0.3006	1.1546	0.5728
Q9UHV7	MED13	-0.4609	1.0319	0.7652
Q9BWS9	CHID1	0.12	0.6953	0.0074
Q9NWU2	GID8	-0.2952	0.7926	0.3856
Q9H0U4	RAB1B;RAB1C	0.127	0.1568	0.4058
P42574	CASP3	-0.1342	0.3305	0.3414
O14874	BCKDK	-0.0917	0.1894	0.1114
Q96PE2	ARHGEF17	0.2248	0.8328	0.1901
Q6NYC1	JMJD6	0.6045	2.3707	2.0111
Q9NYR9	NKIRAS2	0.7508	2.2365	1.6747
P57737-3	CORO7;hCG_1787779	-0.5211	1.5276	1.2047
Q9Y624	F11R	0.195	0.1312	0.6936
Q01459	CTBS	-0.0179	0.462	0.5332
J3KRJ8	CNDP2	-1.0534	1.1685	0.9203
O75935	DCTN3	-0.2239	0.9947	0.1906
Q96EE3-1	SEH1L	-0.0026	0.0124	0.0008
Q9BQC3	DPH2	-0.0643	0.0487	0.0174
Q7Z4S6	KIF21A	0.4654	0.4207	1.6455
Q96EY7	PTCD3	-0.0077	0.0215	0.0028
Q9UBM7	DHCR7	-0.2206	0.4629	0.265
P14618	PKM	-0.0693	0.1076	0.2757
Q14697-2	GANAB	-0.1241	0.2062	0.2421
O94885	SASH1	0.9005	1.9064	5.0138
Q99470	SDF2	0.084	0.233	0.1561
O15344	MID1	0.1268	0.5536	0.1933
Q8TD26	CHD6	0.3518	0.2714	1.1491
Q9NYD6	HOXC10	-0.7808	0.0742	2.6569
H0YG54	REXO2	-0.852	2.0063	0.963
Q9Y282	ERGIC3	-0.2872	0.8361	0.4594
P49459	UBE2A	-0.7595	1.731	1.1289
O60921	HUS1	0.2621	1.0548	0.249
P50579	METAP2	-0.0415	0.1633	0.0783
Q8N5F7	NKAP	0.3452	0.9134	1.611
Q9GZT9	EGLN1	0.0293	0.1096	0.2243
Q96IZ7	RSRC1	0.6542	1.0877	1.1438
Q99650	OSMR	-0.3632	1.6737	0.1591
Q9UBY9	HSPB7;DKFZp779D0968	0.1731	0.0645	0.6849
Q96L50	LRR1	-0.2404	0.0036	0.0858
Q9H0H0	INTS2	-0.1168	0.3861	0.1103
Q8IZN3	ZDHHC14	0.4007	1.081	0.9793
G3V599	CTAGE5	0.2283	1.2419	0.5017
O95396	MOCS3	0.3987	1.9843	0.4052
P43360	MAGEA6;MAGEA2	0.2799	0.6417	0.8775
P08572	COL4A2	0.3246	0.6363	0.441
P55039	DRG2	0.1032	0.7953	0.0081
P07205	2	0.9829	1.3969	3.9774
Q6PCE3	PGM2L1	0.3219	1.4683	0.2584
Q99962	SH3GL2	0.093	0.3797	0.0405
Q9NQS7	INCENP	0.0636	0.1624	0.4151
Q9NSV4	DIAPH3	0.1982	1.4217	0.2212
Q93045	STMN2	0.3207	1.3586	0.2661
Q8WXW3	PIBF1	-0.1735	0.6553	0.257
C4AMC7	WASH3P;WASH2P;WASH1;WASH6P;WASH4P	0.1802	0.6316	0.4174
P52756	RBM5	0.191	0.604	0.3597
Q8TCG1	KIAA1524	-0.0749	0.3482	0.1235
P02452	COL1A1	-0.7689	0.0805	0.0236
O75427	LRCH4	-0.2444	0.4768	0.725
O94915	FRYL	-0.0305	0.2874	0.2621
Q7Z460	CLASP1	0.1491	0.433	0.2919
Q8WV41	SNX33	0.2732	1.9111	0.1057
P07339	CTSD	0.1212	0.1551	0.4338
Q07065	CKAP4	-0.0802	0.384	0.1493
Q8WXA3	RUFY2	-0.4263	0.087	2.1231
P00338	LDHA	0.0012	0.2813	0.1232
Q8TEW0-10	PARD3	0.1154	0.245	0.2157
Q96A49	SYAP1	0.0635	0.1159	0.2224
P78417	GSTO1	0.1637	0.3838	0.5273
Q9NP92	MRPS30	0.6408	1.9396	1.7758
Q8IXB1	DNAJC10	0.0462	0.2683	0.0744
Q9HCG8	CWC22	0.0876	0.1507	0.2861
P14678	SNRPB;SNRPN	-0.2095	0.6966	0.0012
Q9H0R4	HDHD2	-0.4008	2.2164	0.0813
Q99755	PIP5K1A;PIP5K1B	0.7875	2.2746	1.4423
Q9NRW3	APOBEC3C	0.0002	0.1825	0.174
P08842	STS	-0.1988	0.6372	0.3051
Q12800	TFCP2	-0.1083	0.2087	0.1983
Q9HC07	TMEM165	0.2922	0.5942	0.759
Q13404	UBE2V1	-0.1369	0.3974	0.3479
Q9P2R3	ANKFY1	0.02	0.2185	0.0874
Q9NYY8	FASTKD2	-0.1537	0.4439	0.2321
Q9BRT6	LLPH	0.1983	0.3757	0.5562
P46109	CRKL	-0.1683	0.2364	0.3946
Q01433	AMPD2	0.0565	0.1999	0.1532
Q6DD87	ZNF787	-0.0863	0.5423	0.5928
O00483	NDUFA4	0.5741	2.0655	0.8619
Q86XZ4	SPATS2	0.1451	0.5467	0.2869
Q5VVQ6	YOD1	0.3201	2.9592	0.2022
Q5T3I0	GPATCH4	-0.4378	0.7864	0.5739
P11171	EPB41	0.5701	0.9359	0.8819
O14880	MGST3	1.1292	1.5137	3.0512
Q92544	TM9SF4	-0.8894	1.7409	3.0656
Q9HCY8	S100A14	-0.1013	0.0507	0.3109
O75818	RPP40	0.1873	0.4369	0.5086
O95365	ZBTB7A	0.5408	1.1058	1.1417
H7BY16	NCL	0.0933	0.8342	0.1981
O00418	EEF2K	0.273	0.3137	0.7569
P54709	ATP1B3	0.1376	0.3278	0.2042
P43307	SSR1	0.1518	0.3696	0.435
P13639	EEF2	-0.0054	0.2645	0.1567
Q6NUQ4	TMEM214	0.0294	0.1672	0.0418
P50993	ATP1A2	-0.0687	0.2921	0.1449
Q9UFF9	CNOT8	-0.0422	0.0231	0.0407
Q9NYF8	BCLAF1	-0.09	0.0368	0.0596
Q3LXA3	DAK;TKFC	0.252	0.5128	0.7795
Q9BQP7	MGME1	0.372	1.1779	0.7609
Q15326	ZMYND11	0.387	0.9658	0.5189
Q9UL33	TRAPPC2L	0.2058	0.3832	0.5419
P23381	WARS	0.0032	1.4363	0.9116
Q14320	FAM50A	-0.2534	0.4162	0.2618
Q01813	PFKP	-0.0726	0.0645	0.3041
O00459	PIK3R2	0.6062	0.8476	1.3431
E9PRG8	C11orf98	0.2036	0.6418	0.1964
Q9Y6D6	ARFGEF1	0.1006	0.1087	0.4048
Q684P5	RAP1GAP2	-0.3725	0.1557	1.3126
Q8TEA1	NSUN6	0.4289	1.0096	0.7615
Q16576	RBBP7	0.235	0.7649	0.6573
P08069	IGF1R	0.4992	0.642	0.7554
O00142	TK2	0.1243	0.1341	0.3742
Q9BUZ4	TRAF4	-1.0159	0.1232	3.8376
Q9P2N6	KANSL3	-0.0412	0.2458	0.3401
Q7L8W6	DPH6	-0.2825	0.1716	0.8872
Q92614	MYO18A	0.0957	0.5335	0.0598
Q6P4E1	CASC4	-0.0506	1.5447	0.8372
Q9NYS0	NKIRAS1	-0.0103	0.2845	0.1804
F8VWL3	FGD4	-0.0508	0.2327	0.3419
Q14978	NOLC1	0.4117	2.2021	0.9478
Q7Z7C8	TAF8	-0.2535	0.8689	0.3951
P15924	DSP	-0.0343	0.1287	0.0535
Q9H0J9	PARP12	-0.0221	0.3102	0.1637
P22033	MUT	0.0416	0.3382	0.175
Q9UHY1	NRBP1	-0.1453	0.0554	0.5958
Q9NXR1	NDE1	-0.0869	0.0792	0.0429
O95070	YIF1A	-0.1522	0.4892	0.3934
O15013	ARHGEF10	0.2021	0.7355	0.3384
Q9UKX3	MYH13	-0.5992	0.4431	1.4091
Q9UHX1-6	PUF60	0.0975	0.4306	0.2026
O94923	GLCE	-0.3931	0.8439	0.9072
Q9UPN4	CEP131	-0.0435	0.4085	0.1307
O14519	CDK2AP1;CDK2AP2	-0.7732	2.6067	2.6347
P09913	IFIT2	-0.1847	1.1725	0.1289
O75569	PRKRA	0.1214	0.0501	0.2452
B2RTY4	MYO9A	-0.2325	0.059	0.8002
Q08257	CRYZ	-0.0456	0.1385	0.2951
P41250	GARS	0.0331	0.2412	0.343
Q99828	CIB1	0.221	0.5489	0.3384
P09884	POLA1	0.1026	0.0245	0.5962
Q06481	APLP2	0.1111	0.2111	0.6236
P06746	POLB	-0.219	0.6792	0.3323
O60333-3	KIF1B	-0.0701	0.3843	0.0255
O75306	NDUFS2	-0.249	0.1292	0.6025
Q8NC42	RNF149	0.8656	1.4216	1.2594
Q4V328	GRIPAP1	-0.5191	0.5498	1.231
Q16635	TAZ	1.2611	2.4632	3.414
Q8N6T7	SIRT6	-0.2526	0.5248	0.2763
P51452	DUSP3	-0.3372	0.9688	0.82
Q8IXQ4	GPALPP1	-0.0688	0.0668	0.2839
H0Y5C6	FLNA	-1.3409	6.1069	3.6944
Q9H4A6	GOLPH3	0.022	0.0771	0.1675
P51884	LUM	0.4641	0.5145	0.7239
Q13510	ASAH1	-0.1356	0.2052	0.1148
A6ZKI3	FAM127A;FAM127C	-0.1985	0.04	1.0468
Q05048	CSTF1	-0.2288	0.1162	0.7014
Q5T7V8	GORAB	0.4121	0.5996	0.9308
P12111	COL6A3	0.7152	0.1063	0.9948
Q99986	VRK1	-0.0786	0.7167	1.0419
P24311	COX7B	-0.828	0.0352	0.13
Q14008	CKAP5	0.2356	0.7612	0.6072
Q96EU7	C1GALT1C1	0.2589	0.5738	0.7648
P63104	YWHAZ	-0.0345	0.0409	0.1334
Q96QC0	PPP1R10	0.0874	0.1878	0.1465
A5PLN9	TRAPPC13	-0.0069	0.1349	0.0452
Q6DHV7-2	ADAL	0.3182	0.5267	0.7999
Q8NEU8	APPL2	0.1731	0.2261	0.497
O14867	BACH1	0.664	0.9039	2.8878
Q9Y2X0	MED16	0.43	0.8631	1.2726
Q9UL25	RAB21	-0.0685	0.0272	0.3513
P16401	HIST1H1B	0.7828	3.2939	2.2813
Q6IN84	MRM1	-0.1152	0.3969	0.1734
Q562E7	WDR81	0.1555	0.5294	0.1627
Q8WZ42	TTN	0.2876	0.4631	0.8062
P50897	PPT1	-0.2632	0.0946	0.775
Q9BT40	INPP5K	0.4984	1.6719	1.1511
O14646	CHD1	0.0796	0.8849	0.1291
P04083	ANXA1	0.1147	0.3372	0.4058
Q15417	CNN3	0.8464	1.8125	0.8052
P20933	AGA	0.1142	0.2129	0.2601
P49427	CDC34	-0.341	0.1616	1.0984
P49247	RPIA	0.0924	0.1051	0.4782
Q9Y5P4	COL4A3BP	0.1897	0.8277	0.1016
Q9H4Z3	PCIF1	0.0128	0.1052	0.1074
O43791	SPOP	-0.3564	0.6489	1.1365
Q8NDF8	PAPD5	0.1861	1.5711	0.0082
O76071	CIAO1	0.0694	0.2571	0.1394
Q86US8	SMG6	0.0237	0.1281	0.0266
Q9H9E3	COG4	-0.5185	0.2127	0.8844
Q8N5I4	DHRSX	-0.0169	0.9494	0.6516
P00492	HPRT1	0.1288	0.4854	0.2227
Q9C0H5-2	ARHGAP39	0.1518	0.3362	0.308
Q9H9P8	L2HGDH	-0.718	0.1945	0.2048
F5H8J3	CLPTM1	0.2806	0.3075	2.0167
P35610	SOAT1	0.0571	0.0666	0.167
Q9Y2X9	ZNF281	0.0252	0.2556	0.0764
Q06136	KDSR	0.8631	4.2782	2.5691
Q8ND04	SMG8	0.5331	1.3588	1.4745
P23443	RPS6KB1	0.1414	0.4077	0.101
Q9BSR8	YIPF4	-0.7989	2.0251	1.5322
P04080	CSTB	0.1525	0.453	0.2222
Q96AG4	LRRC59	-0.1002	0.1345	0.2594
Q8IZV5	RDH10	-0.0865	0.596	0.3661
P63151	PPP2R2A	0.0751	0.1639	0.2315
P19367	HK1	-0.4308	1.7882	1.4302
P84103	SRSF3	-0.4999	0.2324	0.5797
Q53GS9	USP39	-0.0551	0.1312	0.1098
Q8WXG6	MADD	-0.1403	0.786	0.5381
Q13470	TNK1	-0.6639	1.0198	2.8452
Q03518	TAP1	-0.0141	0.3538	0.2943
Q12834	CDC20	-0.0056	0.5949	0.8109
P62266	RPS23	0.093	0.1705	0.1387
J3KPF0	HECTD4	0.2622	0.4191	0.4621
Q99567	NUP88	-0.3698	1.8538	0.6411
P49005	POLD2	0.888	1.7973	0.7387
Q9H9B1	EHMT1	0.1288	0.2486	0.2657
Q15418	RPS6KA1	0.1824	0.8499	0.2004
P54727	RAD23B	0.1454	0.5687	0.2299
Q9GZS1-2	POLR1E	0.0049	0.0309	0.0117
O60306	AQR	-0.0463	0.0091	0.0659
Q9NS69	TOMM22	-0.009	0.3762	0.098
Q9P0V3	SH3BP4	0.3698	0.8361	0.6145
Q9BQG2	NUDT12	0.0641	0.3118	0.0439
Q8TB61	SLC35B2	-0.0633	0.5157	0.035
Q9UBK8	MTRR	0.1303	0.1706	0.4107
Q9NZD2	GLTP	0.0301	0.0123	0.0928
Q8WZA1	POMGNT1	-0.1174	0.1568	0.0327
Q15392	DHCR24	-0.3479	2.3751	0.7217
Q8IWE2	FAM114A1	-0.0545	0.2838	0.3615
P63173	RPL38	-0.2716	1.1637	0.7495
Q9BPY3	FAM118B	-0.5677	1.974	1.1717
Q16649	NFIL3	0.0635	0.0885	0.1461
P35232	PHB	0.1178	0.6572	0.0759
Q9BQ52	ELAC2	-0.0352	0.036	0.279
Q9BS26	ERP44	-0.6383	1.4677	1.2867
Q9NX63	CHCHD3	-0.4571	0.8998	1.6644
P37802	TAGLN2	-0.2402	0.2885	1.1138
P25786	PSMA1	0.0167	0.0174	0.0729
Q7Z739	YTHDF3	0.1352	0.4936	0.4884
O15372	EIF3H	0.234	0.6548	0.8796
Q96HJ9	C7orf55	0.0251	0.3725	0.1439
O00469-2	PLOD2	0.0371	0.3436	0.047
Q9HBH5	RDH14	-0.1401	0.0716	0.334
Q8IYL3	C1orf174	-0.0597	1.1652	1.2108
Q9BPX7	C7orf25	-0.1119	0.0146	0.6911
P18615	NELFE	0.0692	0.2658	0.064
Q13426	XRCC4	0.0247	0.4733	0.1926
Q86TW2	ADCK1	-0.2539	0.2461	0.2379
Q13907	IDI1	0.2577	0.8765	0.4854
Q96MG7	NDNL2	0.125	0.8838	0.0027
Q96CW1	AP2M1	-0.0412	0.4025	0.1307
Q9NR45	NANS	0.0855	0.0712	0.4198
Q6EMK4	VASN	0.6673	2.9414	0.8327
Q3SXM5	HSDL1	-0.0462	0.1772	0.2389
Q9UL26	RAB22A	-0.4702	1.7786	0.2452
Q9NYL2	ZAK	-0.1522	0.2342	0.5689
Q15311	RALBP1	0.0368	0.5413	0.7184
Q12905	ILF2	0.0539	0.265	0.0829
P62753	RPS6	-0.0352	0.1199	0.12
P25208	NFYB	-0.1072	0.4706	0.2049
P50502	ST13;ST13P4;ST13P5	-0.1648	0.5769	0.1119
Q9H4H8	FAM83D	0.1237	0.3421	0.1252
Q9Y2Z9	COQ6	0.1497	0.5278	0.1975
Q9ULH1	ASAP1	-0.0687	0.2432	0.0835
Q9HCE0	EPG5	-4.3577	3.7915	6.4107
Q9BW72	HIGD2A	-0.4401	0.6857	0.9473
P30048	PRDX3	0.0462	0.3503	0.0489
Q96AQ8	MCUR1	-0.3196	0.029	0.8056
Q9BRZ2	TRIM56	-0.2787	0.266	0.4658
O00257	CBX4	0.1734	0.3686	0.2544
Q96GE9	TMEM261	-0.3431	0.0206	1.489
Q9C037	TRIM4	-0.4748	0.028	1.2628
Q9H4G0	EPB41L1	-0.6414	4.1432	0.1819
Q08AD1	CAMSAP2	-0.0596	0.0228	0.1316
Q68CQ4	DIEXF	-0.3304	0.4588	0.5073
Q9NZ52	GGA3	-0.0803	0.3554	0.3932
Q9Y287	ITM2B	-1.6916	11.6451	0.5105
Q9NVN3	RIC8B	-0.2365	0.5796	0.2679
Q9H3U1	UNC45A	-0.042	0.4321	0.0323
Q8NHH9	ATL2	-0.5552	0.8886	0.6671
Q32NC0	C18orf21	0.4051	0.2246	1.2321
Q13685	AAMP	0.1781	0.5976	0.153
O60506-3	SYNCRIP	0.1623	0.307	0.3289
O94967	WDR47	-0.1499	2.4621	0.3847
Q8TCC3	MRPL30	0.6029	2.1887	0.7292
Q6UUV7	CRTC3	0.4153	1.3086	1.363
O43854	EDIL3	0.1104	0.0991	0.3149
P09417	QDPR	0.2685	0.366	0.7672
O75448	MED24	-0.1341	0.2987	0.0603
P39210	MPV17	0.0777	0.039	0.3228
Q15283	RASA2	0.4065	0.3179	1.178
Q9UBV2	SEL1L	0.0685	0.008	0.3705
P51003	PAPOLA	0.1967	0.5385	0.4819
Q15370	TCEB2	-0.0917	0.3657	0.0837
P82094	TMF1	0.059	0.5158	0.6324
Q15906	VPS72	-0.049	0.0002	0.2458
Q9P2J3	KLHL9;KLHL13;DKFZp686L0695	-0.6259	2.1471	1.6192
H7C1U3	CC2D1B	0.276	0.9347	0.7078
Q99569	PKP4	0.1197	0.5454	0.091
P08048	ZFY;ZFX	-0.0994	0.2778	0.5297
O60216	RAD21	0.1318	0.0508	0.6402
P49406	MRPL19	0.1386	0.3664	0.3934
Q02952	AKAP12	0.8773	1.3281	0.5111
P02533	KRT14	0.0052	0.3799	0.341
P62841	RPS15	0.1076	0.1404	0.2554
Q5VW38	GPR107	0.28	0.5194	0.29
Q96EK4	THAP11	0.1205	0.3453	0.2124
Q96A33	CCDC47	-0.0428	0.5695	0.0937
Q9UHR4	BAIAP2L1	0.0002	0.201	0.1605
Q96DC8	ECHDC3	0.5796	1.7276	1.8681
Q92564	DCUN1D4	0.0377	0.155	0.3004
Q8IVB5	LIX1L	0.6033	0.7244	1.289
Q8IYA6	CKAP2L	0.4823	1.0517	1.097
Q96ME1-4	FBXL18	0.0617	0.1013	0.4548
Q9BRP8	WIBG	-0.1056	0.0204	0.0977
Q96K49	TMEM87B	0.1106	0.3378	0.1505
Q14534	SQLE	0.0338	0.2146	0.0203
Q96SI9	STRBP	-0.018	0.2771	0.2845
Q8NB16	MLKL	-0.1184	0.1758	0.3845
Q9NXV6	CDKN2AIP	0.2082	1.0169	0.3436
Q96JG6	CCDC132;DKFZp313I2429	-0.1973	0.3937	0.5725
Q5K651	SAMD9	0.0577	0.1176	0.111
Q86UY6	NAA40	0.3923	0.7148	0.6478
O43598	DNPH1	-0.7049	1.7678	0.9594
Q9ULX6	AKAP8L	0.0907	0.3244	0.1617
Q9Y547	HSPB11	0.173	0.4747	0.2487
Q9BW71	HIRIP3	0.1624	0.2853	0.0885
Q96QD8	SLC38A2	0.2105	0.5115	0.3652
Q8NEB9	PIK3C3	0.4079	1.5753	0.7057
Q8NI22	MCFD2	-0.2732	0.019	1.7579
P35613	BSG	-0.0945	0.2071	0.1948
P50542-2	PEX5	-0.1595	0.098	0.2823
O95900	TRUB2	0.3795	1.1141	0.9588
Q9P0L0-2	VAPA	-0.0809	0.4393	0.1212
P62913	RPL11	0.1285	0.6333	0.0702
Q9BZL6	PRKD2	-0.1739	0.2693	0.601
P09669	COX6C	0.3372	0.6859	0.6751
Q15554	TERF2	0.1346	0.2639	0.4027
Q8WTS6	SETD7	0.0079	0.4863	0.3019
Q9Y5X1	SNX9	0.0962	0.065	0.4952
Q86U44	METTL3	0.0752	0.5144	0.0206
O14795	UNC13B	0.2039	0.2023	0.5341
Q5VYS8	ZCCHC6	0.2213	0.3856	0.335
Q9Y4D1	DAAM1	-0.2201	0.0175	1.0923
Q9H0C8	ILKAP	0.1627	0.6135	0.1807
Q5HYI8	RABL3	-0.1165	0.1579	0.6104
Q9BXF6	RAB11FIP5	-0.299	0.5124	0.0839
P05787	KRT8	-0.2632	0.9004	0.8405
Q9NQ88	TIGAR	-0.0065	0.6261	0.4202
O95251	KAT7	-0.0337	0.0291	0.0911
Q7RTP6	MICAL3	0.1215	0.7721	0.1788
Q9BV40	VAMP8	0.2369	0.5223	0.3372
Q6UXN9	WDR82	0.1053	0.8307	0.0148
Q13535	ATR	-0.0737	0.6949	0.1611
Q9ULT8	HECTD1	-0.0837	0.3523	0.6306
Q3V6T2	CCDC88A	-0.2171	1.2796	0.5027
O00308	WWP2	-0.6893	0.9165	2.9872
Q14653	IRF3	-0.7204	1.9925	0.8424
Q5TC12-3	ATPAF1	0.0005	0.0525	0.0288
Q96BY7	ATG2B	0.9401	0.7561	1.1506
O94768	STK17B	0.365	1.1413	0.657
Q7Z7E8	UBE2Q1	0.2642	0.9053	0.3542
O75145	PPFIA3	-2.1738	0.349	1.2636
Q96RK0	CIC	0.6494	0.5554	2.1957
F5H658	DHX8	0.2993	1.16	0.6653
P43246	MSH2	0.1246	0.5001	0.2025
Q8NFW8	CMAS	0.0655	0.0025	0.2806
P55061	TMBIM6	0.1175	0.3901	0.1023
P19256-3	CD58	-0.4937	0.8903	1.0447
P62312	6	-0.0671	0.1679	0.2104
Q99575	POP1	0.1442	0.2982	0.3103
P17480	UBTF	0.1789	0.2239	0.6157
Q86TG7	PEG10	-0.8638	0.8202	0.6096
O15066	KIF3B	0.1863	0.5158	0.4109
P22415	USF1	-0.1754	0.2189	0.9526
Q9NZ08	ERAP1	-0.0502	0.319	0.007
P35573	AGL	0.1043	0.1359	0.2702
Q6NUQ1	RINT1	-0.1674	0.2929	0.2619
Q7L7X3	TAOK1	-0.1945	0.043	0.8187
Q9H7B2	RPF2	-0.135	0.5434	0.1427
Q9H4L4	SENP3	0.0631	0.0924	0.2327
Q8NEC7	GSTCD	0.4236	1.6052	0.8641
Q9H5J8	TAF1D	-0.4252	1.4144	0.3694
Q9Y2S7	POLDIP2	0.0809	0.5467	0.0904
Q9BYN8	MRPS26	-0.2754	0.2899	0.4234
Q9UP83	COG5	-0.2152	0.2998	0.5857
P21926	CD9	-0.0859	0.2327	0.0738
P49748	ACADVL	0.2249	0.6433	0.5526
P51553	IDH3G	-0.183	0.053	0.4146
Q03154	ACY1;ABHD14A-ACY1	0.2934	0.3373	0.6063
P41134	ID1	-1.8286	10.3996	2.0573
Q5T1C6	THEM4	0.1338	0.4737	0.1403
Q9H1E5	TMX4	-0.2992	1.2906	0.6375
O43482	OIP5	-0.3979	0.2981	3.8291
Q7Z2T5	TRMT1L	-0.2964	1.263	0.127
P11279	LAMP1	-0.2605	0.0968	0.986
Q9NXX6	NSMCE4A	-0.6622	0.4686	0.8856
Q9NYJ1	COA4	-0.6228	1.813	0.6379
O14578-4	CIT	0.5015	0.9083	1.2906
P52292	KPNA2	-0.1764	0.2089	0.5531
P08581	MET	0.866	3.1644	2.2306
Q9NVM6	DNAJC17	0.0548	0.166	0.2636
P35908	KRT2	0.135	0.3606	0.2822
P41236	PPP1R2;PPP1R2P3	-0.1157	0.1747	0.3824
Q8N0U4	FAM185A	-0.8073	0.2194	2.8341
Q96B36	AKT1S1	0.3526	0.3368	0.5744
P08237	PFKM	-0.0774	0.2467	0.1529
Q14493	SLBP	-0.5479	0.0581	3.8584
Q08209	PPP3CA	0.3588	0.6444	0.909
Q86VW0	SESTD1	-0.068	0.0733	0.0427
Q92879-4	CELF1	0.2375	0.5811	0.6891
Q8N6Q8	METTL25	-0.7277	0.9044	1.577
B4DP36	CALCOCO2	0.1825	0.6716	0.3841
O60610	DIAPH1	-0.2258	0.5704	0.5338
Q9NVH2	INTS7	0.459	1.8315	1.1472
Q9H814	PHAX	-0.0466	0.234	0.0499
P84098	RPL19	-0.2487	0.1157	0.5455
P43378	PTPN9	0.532	0.9885	1.901
Q9Y536	PPIAL4A	-0.1796	0.0894	0.1644
O14657	TOR1B	0.1663	0.392	0.3226
Q15006	EMC2	-0.128	0.6265	0.0024
Q9UNQ2	DIMT1	0.0429	0.1301	0.2889
O43772	SLC25A20	0.1587	0.1829	0.3534
Q14156	EFR3A	-0.1521	0.0937	0.7103
Q96T23	RSF1	0.2289	0.6852	0.8165
Q06547	GABPB1;GABPB2	0.2937	0.5799	0.4372
Q9UBC3	DNMT3B	0.4472	1.0162	1.152
Q9H7N4	SCAF1	-0.2979	0.1204	1.191
O96007	MOCS2	-0.618	1.1082	1.7444
Q96P47	AGAP3	0.2275	0.0646	0.975
Q04206	RELA	-0.1858	0.5478	0.5411
P45974-2	USP5	0.0092	0.0985	0.0109
Q15434	RBMS2	0.2841	0.7995	0.692
Q96EK6	GNPNAT1	0.3745	0.8371	1.4471
E9PN20	ZNF595	-0.4851	1.278	0.2287
Q8IV50	LYSMD2	0.1142	0.5599	0.0663
Q9BQE9	BCL7B	-0.0447	0.042	0.0153
P49716	CEBPD	0.2079	0.6887	0.1793
Q13287	NMI	0.0415	0.1761	0.0153
P07919	UQCRH	0.5467	1.0965	1.2745
P61026	RAB10	0.0785	0.4012	0.083
O00291	HIP1	-0.2581	0.9348	0.7109
Q8WXF1	PSPC1	0.0604	0.1385	0.1444
Q8WTW4	NPRL2	-1.7159	1.1425	1.1893
O15391	YY2	0.1157	0.4082	0.1371
Q5VU43-2	PDE4DIP	0.2512	0.3696	0.4122
Q9P0P0	RNF181	-0.0654	0.14	0.1835
O60318	MCM3AP	-0.263	0.6838	0.2216
Q9NW13	RBM28	0.1839	0.5393	0.5663
O60826	CCDC22	-0.135	0.264	0.3861
O75940	SMNDC1	0.0282	0.104	0.0823
Q969Q5	RAB24	-1.1098	0.6366	7.0289
Q12929	EPS8	-0.5525	0.9343	0.6745
Q9P2R7	SUCLA2	0.257	1.0152	0.4218
Q5MIZ7	SMEK2	0.3432	1.1625	0.8132
Q86X55	CARM1	-0.0403	0.2838	0.1003
Q13610	PWP1	-0.0663	0.3405	0.0332
Q9NQ92	COPRS	0.5478	3.1301	1.7973
Q8IWT0	ZBTB8OS	0.4874	0.3946	1.0336
Q96JB2	COG3	-0.0657	0.1722	0.0889
Q12872	SFSWAP	0.218	0.6184	0.3699
Q6IQ49	SDE2	-0.2233	0.5578	0.6304
P16333	NCK1	0.015	0.1627	0.1925
Q96RQ3	MCCC1	0.1554	0.2577	0.4197
Q5T8P6-3	RBM26	0.2162	1.0153	0.6102
P08236	GUSB	0.1669	0.3319	0.4747
Q4VC44	FLYWCH1	-0.8537	2.9961	0.6703
Q9BW62	KATNAL1	0.7432	2.0258	2.8014
O14964	HGS	-0.0701	0.1874	0.4153
Q5BJF6	ODF2	0.4292	1.1172	0.9001
Q9UGP4	LIMD1	-0.1539	0.4971	0.1264
P83876	TXNL4A	-0.2182	0.0489	0.6233
Q5H9R7	PPP6R3	0.1804	0.3605	0.7267
Q9BUL5	PHF23	0.1313	0.844	0.0148
P17252	PRKCA	0.1364	0.3767	0.749
O60869	EDF1	-0.0799	0.0581	0.3692
Q9BPX5	ARPC5L	-0.1701	0.6014	0.0755
Q8IXI1	RHOT2	0.0522	0.1654	0.1628
Q9P0V9	SEPT10	0.315	0.6967	1.2559
Q9Y512	SAMM50	0.1498	0.3414	0.3543
P32754	HPD	-0.0014	0.1606	0.0176
Q9NVG8	TBC1D13	-0.1264	0.0371	0.6492
Q14642	INPP5A	0.7919	4.157	0.7579
Q96HN2	AHCYL2	0.2188	0.0082	0.7121
P54578	USP14	0.1314	0.1647	0.5595
Q15642-2	TRIP10	-0.1094	0.0725	0.3164
Q9Y3D0	FAM96B	-0.3335	0.0853	0.3716
Q13557	CAMK2D	-0.6563	1.0408	2.0464
Q9NR19	ACSS2	0.4022	0.384	0.6767
Q9UI12	ATP6V1H	-0.1605	0.1327	0.7556
Q1KMD3	HNRNPUL2;HNRNPUL2-BSCL2	-0.1456	0.4763	0.2837
O94888	UBXN7	0.3999	3.1109	1.1348
Q13952	NFYC	-0.1542	0.2563	0.2456
Q99615	DNAJC7	0.2009	0.8249	0.3862
Q8WUM0	NUP133	-0.0148	0.0498	0.1044
O00592	PODXL	0.1614	0.6685	0.3948
B5MD87	PYCRL	0.1275	0.2067	0.2469
Q9ULR0	ISY1	0.1095	0.2572	0.2405
Q9Y3L5	RAP2C	0.1354	0.2093	0.3164
Q9Y2J4	AMOTL2	-1.9753	2.6116	9.0523
P24534	EEF1B2	0.0708	0.0447	0.3748
Q5VWQ0	RSBN1	0.0264	0.1449	0.1321
Q8IXM3	MRPL41	0.3074	0.8733	1.2349
P02786	TFRC	-0.0248	0.2408	0.3017
Q04864	REL	0.4054	1.8442	0.202
Q9Y224	C14orf166	0.1247	0.7127	0.2963
P04899	GNAI2	-0.1929	0.0426	0.1749
Q9H7F0	ATP13A3	0.1885	0.36	0.348
Q9Y320	TMX2	-0.1211	0.447	0.0357
Q8IWT6	LRRC8A	-0.1448	0.1597	0.2742
Q9NYI0	PSD3	0.0435	0.2647	0.0079
P51648	ALDH3A2	0.104	0.0399	0.4158
P11717	IGF2R	-0.2432	0.0591	0.9113
P02753	RBP4	0.1835	3.2803	1.1244
G3V325	ATP5J2-PTCD1;PTCD1	-0.0534	0.0576	0.0265
Q8IZ69	TRMT2A	0.0033	0.459	0.1918
Q9BXW6	OSBPL1A	-0.2515	0.9587	0.1953
Q9UHF7	TRPS1	0.1548	0.0262	0.6626
Q9H270	VPS11	-0.1201	0.3011	0.0695
P23526	AHCY	-0.1437	1.2944	0.0167
Q03164	KMT2A	0.2458	1.3026	0.3818
Q6N043	ZNF280D	0.2766	0.1108	1.3125
O75182-2	SIN3B	-0.1901	0.3289	0.3884
Q9GZR7	DDX24	-0.2626	0.4012	0.2464
O15554	KCNN4	-0.5059	0.7495	0.6398
O96000	NDUFB10	0.5259	0.7901	0.9839
O60503	ADCY9	-0.0571	0.3573	0.06
O43776	NARS	-0.0983	0.3624	0.1166
Q93073	SECISBP2L	-0.2502	0.631	0.1749
P82932	MRPS6	0.1854	0.0489	0.5746
Q96BN2	TADA1	0.5131	0.5834	1.1115
Q9P2D8	UNC79	-0.5737	0.547	2.1443
Q9UIW2	PLXNA1	-0.212	0.2167	0.7483
Q15125	EBP	0.3572	0.1891	0.6465
Q9BW60	ELOVL1	-0.3363	1.6927	0.0061
P56524	HDAC4	-0.5266	1.0369	0.9357
Q6IPR3	TYW3	0.0361	0.3419	0.3061
O43474	KLF4	-0.7851	0.6035	6.2631
Q8NEY1	NAV1	0.1212	0.5569	0.1375
P08758	ANXA5	-0.0953	0.0913	0.6543
O14773	TPP1	-0.0834	0.1044	0.1967
P09012	SNRPA	-0.0392	0.1486	0.0442
P63244	GNB2L1	-0.2344	0.4888	0.6214
Q658Y4	FAM91A1	0.1849	0.5306	0.2504
Q8WY36	BBX	0.4954	2.2174	0.909
O14907	TAX1BP3	-0.6583	3.176	0.4563
Q96NH3	TBC1D32	-0.0176	0.238	0.1314
Q6P1K8	GTF2H2C;GTF2H2	0.0791	0.2129	0.1398
P55769	NHP2L1	0.221	0.4209	0.4517
Q14126	DSG2	2.1837	4.8457	4.0491
Q96JB5	CDK5RAP3	0.2067	0.4211	0.5911
P10644	PRKAR1A	-0.2669	0.7647	0.6383
Q9BT78	COPS4	-0.1413	0.6813	0.0789
O15131	KPNA5	0.6219	2.4476	2.156
O15121	DEGS1	0.1581	0.3955	0.3475
Q8NE71	ABCF1	0.0662	0.1766	0.1429
Q13825	AUH	0.4944	0.8291	0.833
Q9UHW9-2	SLC12A6	-0.0195	0.3495	0.1134
Q9Y4H2	IRS2	0.3042	0.795	0.8357
Q9Y3B3	TMED7;TICAM2	-1.2555	2.2513	2.258
Q9Y6W3	CAPN7	-0.355	0.713	0.4411
Q15233	NONO	-0.1929	0.4477	0.5641
Q9Y6W5	WASF2	0.1201	0.1829	0.2953
Q6IBW4	NCAPH2	-0.2386	0.2163	0.8183
Q13637	RAB32	-0.0903	0.3407	0.1695
Q6P587	FAHD1	-0.2712	0.4875	0.4521
Q659A1	ICE2	0.3546	1.0789	0.6176
Q93077	HIST1H2AC;HIST1H2AG;HIST1H2AJ;H2AFJ;HIST1H2AH	-0.6597	0.929	1.1968
O43752	STX6	-1.8606	0.9488	0.8144
P52815	MRPL12	0.0685	0.2095	0.513
Q9BSF4	C19orf52	0.6118	0.5346	1.0472
Q96GQ7	DDX27	-0.1265	1.1311	0.0137
P49366	DHPS	0.0975	0.266	0.6905
Q14914	PTGR1	0.043	0.0849	0.2947
Q330K2	NDUFAF6	-0.2137	0.0918	0.5954
Q9NUQ9	FAM49B	0.4411	2.1875	1.1127
Q92615	LARP4B	-0.2139	0.5372	0.5051
Q8IYU8	MICU2	0.1249	0.0618	0.6057
O75607	NPM3	-0.4625	0.7928	0.6597
Q5T8D3-3	ACBD5	-0.5508	3.1204	0.6217
B5MD23	TSPAN9	0.3411	0.2618	0.708
Q13501	SQSTM1	0.0303	0.1764	0.0545
P43003	SLC1A3	-0.4712	0.3318	1.8212
Q9NWM8	FKBP14	0.3524	2.1054	0.6359
P11166	SLC2A1	-2.4028	0.6505	0.8555
Q6P1J9	CDC73	0.1133	0.5816	0.1554
P42166	TMPO	-0.0159	0.041	0.1103
P06396-2	GSN	0.0717	0.308	0.0325
P14923	JUP	0.0806	0.6511	0.0772
P51649	ALDH5A1	0.131	0.0678	0.3387
Q92968	PEX13	-0.4698	0.6464	1.5837
Q05086	UBE3A	-0.057	0.023	0.0589
Q9BTC8	MTA3	-0.3613	1.6181	0.0198
P42568	MLLT3	-0.4864	0.5767	1.9237
O15126	SCAMP1	-0.1062	0.1566	0.1465
Q5LJA5	UCHL5	0.1371	0.1869	0.5692
P30837	ALDH1B1	0.1495	1.3687	0.0016
O95163	IKBKAP	-0.1764	0.4193	0.3943
Q8NFF5	FLAD1	-0.1507	0.906	0.0846
P06213	INSR	-0.3588	1.4923	0.1403
O15228	GNPAT	-0.4464	0.4371	1.001
P26368	U2AF2	-0.0811	0.0697	0.1198
Q92629	SGCD	-1.9385	7.0249	4.5069
Q96C57	C12orf43	0.0809	1.1825	1.2709
O75030-12	MITF	0.0623	0.2686	0.4494
Q9BZD4	NUF2	0.1234	0.3502	0.374
Q9NZM3	ITSN2	-0.3917	2.2965	0.0861
Q17RS7	GEN1	-1.4267	2.8324	2.1518
P10176	COX8A	0.5	2.4807	1.4409
Q52LJ0-2	FAM98B	0.1991	0.1915	0.8548
Q9NR12	PDLIM7	-0.0713	0.4417	0.018
O95155	UBE4B	0.0028	0.0456	0.0686
O43674	NDUFB5	0.4693	2.9752	0.906
Q8N1B4	VPS52	0.203	0.6641	0.2581
P62750	RPL23A	0.2014	0.1151	0.7518
P62937	PPIA	0.0829	0.3379	0.0959
P61956	SUMO2	-0.3078	1.188	0.1375
Q96BY6	DOCK10	-0.1345	0.0267	0.202
Q49A88	CCDC14	-0.3566	0.6676	2.086
Q96MX6	WDR92;DKFZp434B156	0.5292	1.6282	1.5951
Q8IWJ2	GCC2	0.1497	0.2552	0.4672
O75879	GATB;PET112	0.0488	0.7674	0.0356
O43396	TXNL1	-0.2797	0.1892	0.4336
P07992	ERCC1	-0.6306	1.2124	0.4236
P68371	TUBB4B	-0.1042	0.1641	0.1975
P15927	RPA2	0.1438	0.1857	0.7614
O94782	USP1	0.015	0.0841	0.0052
P36956	SREBF1	-0.6924	0.0302	4.0809
Q99714	HSD17B10	-0.4134	0.8277	0.6039
P08243	ASNS	0.058	0.4891	0.6574
Q9Y2A7	NCKAP1	0.0989	0.127	0.4208
O00244	ATOX1	-0.1104	0.0399	0.5681
P50443	SLC26A2	0.0855	0.3498	0.129
O00154-4	ACOT7	-0.0459	0.0941	0.0384
P54132	BLM	-0.3408	0.7019	1.2241
Q96ME7	ZNF512	-0.1948	0.2662	0.5001
Q3KR37	GRAMD1B	-0.2319	2.8838	0.2554
Q96NE9	FRMD6	-0.9822	2.9835	1.7492
O00512	BCL9	0.0458	0.8105	0.2368
Q9NQX3	GPHN	-0.1949	0.0877	0.8588
P08107	HSPA1A	0.072	0.4254	0.135
Q08378	GOLGA3	-0.2562	0.0017	1.5886
P05198	EIF2S1	-0.1579	0.5359	0.381
Q96EY4	TMA16	-0.128	0.2921	0.4724
Q8IYB5-3	SMAP1	0.2434	1.4847	0.0585
Q92797	SYMPK	-0.0425	0.0239	0.2046
Q8IWW6	ARHGAP12	-0.3091	0.4293	1.5025
O95671	ASMTL	-0.3935	1.2437	0.2415
P62277	RPS13	-0.034	0.0876	0.0145
Q8N302	AGGF1	-0.059	0.1277	0.0091
Q96JP5	ZFP91;ZFP91-CNTF	0.3342	0.9705	0.3079
Q8NDT2	RBM15B	-0.2072	0.1003	0.2672
P41567	EIF1	0.2456	1.1778	0.1823
O15533	TAPBP	0.5505	0.742	1.0324
P23025	XPA	-0.6872	0.6784	4.4017
Q06546	GABPA	0.2302	1.1221	0.2079
Q5VZL5	ZMYM4	0.162	0.496	0.1864
Q9BZQ6	EDEM3	-0.0548	0.3658	0.4377
Q6Y288	B3GALTL	-0.3689	0.0876	3.1078
P15056	BRAF	0.7006	0.4419	0.8792
P53567	CEBPG	-0.1432	1.3967	0.1145
Q9BV57	ADI1	-0.0867	0.1422	0.0135
Q9Y312	AAR2	-0.0234	0.096	0.1574
Q8NBT2	SPC24	0.033	0.4407	0.5782
Q5JVF3	PCID2	-0.0044	0.4106	0.3476
O43447	PPIH	0.2197	0.5179	0.5638
O75208	COQ9	0.2158	0.6593	0.2552
Q9P2D0	IBTK	0.1235	0.1068	0.2454
Q9UBS4	DNAJB11	0.0123	0.1585	0.2402
Q02978	SLC25A11	-0.1211	0.8015	0.0563
Q9UP95	SLC12A4	0.3128	0.4148	1.0903
Q12904	AIMP1	0.2763	0.1918	0.5818
Q16560	SNRNP35	0.0497	0.3662	0.0941
Q14781	CBX2	-0.1625	0.3801	0.2496
Q9NYC9	DNAH9	-0.013	0.3152	0.166
O60292	SIPA1L3	-2.7359	2.6307	9.8403
Q9UKB3	DNAJC12	-0.6991	0.1475	0.1704
Q9H583	HEATR1	-0.161	0.536	0.3036
Q9NPL8	TIMMDC1	-0.3542	0.7628	0.7012
P06744	GPI	0.0481	0.1445	0.1008
Q9HAZ1	CLK4	0.1777	1.3255	0.0643
P32322	PYCR1	0.0596	0.0492	0.3064
Q9BSC4	NOL10	0.0285	0.0834	0.0728
Q9UBB6	NCDN	-0.1957	0.0202	0.4969
P18031	PTPN1	0.2704	0.7087	0.7686
Q9UKK9	NUDT5	0.0434	0.3159	0.0144
P20839	IMPDH1	0.1442	0.5231	0.2112
M0R0M3	GGACT	-0.1	0.5557	0.3988
Q8NHG8	ZNRF2	-0.2608	0.1964	0.262
Q13503	MED21	0.2915	0.2008	1.1487
P17301	ITGA2	0.3524	1.6179	0.2837
Q9HAV0	GNB4	-0.162	0.5409	0.0933
P19971	TYMP	-0.318	0.685	0.315
P56381	ATP5E;ATP5EP2	-0.1439	0.2367	0.1237
P30291	WEE1	-0.745	1.6017	1.5156
O60671	RAD1	0.2831	0.0806	1.4085
O75446	SAP30	0.3259	0.4348	1.7492
O43823	AKAP8	-0.0302	0.2531	0.0098
Q93008	USP9X	0.0326	0.0856	0.2301
Q93050	ATP6V0A1	-0.2864	1.1901	0.2184
P19105	MYL12A	-0.2168	1.0229	0.0444
O95071	UBR5	0.0504	0.1387	0.2598
P63098	PPP3R1	-0.1806	0.5898	0.2565
Q4KMP7	TBC1D10B	0.3453	0.5027	0.7307
O43399-2	TPD52L2	0.2465	0.2017	0.5296
P13010	XRCC5	0.0066	0.0859	0.0955
Q9UM11	FZR1	-0.2579	0.3531	0.0882
Q8WVK7	SKA2	-0.3387	0.8287	1.1861
Q9UMS0	NFU1	0.1368	0.8257	0.0469
Q8IZH2	XRN1	0.2566	0.6595	0.6617
P62910	RPL32	-0.1387	0.4514	0.0338
O14745	SLC9A3R1	-0.1545	0.3304	0.1308
Q13049	TRIM32	-0.4046	0.6097	0.4992
Q9H1A4	ANAPC1	-0.0118	0.166	0.1671
Q9UBI1	COMMD3	-0.2634	1.198	0.7244
P41252	IARS	0.0979	0.5551	0.149
Q9NQE9	HINT3	-0.5104	0.1212	0.4344
Q9Y277	VDAC3	0.2731	1.0522	0.5369
Q9Y6A4	CFAP20	0.0174	0.0326	0.1052
O15119	TBX3;TBX2	-0.1238	0.4405	0.0017
Q9Y2L1	DIS3	0.1046	0.2364	0.309
Q86U38	NOP9	-0.3332	1.5146	0.3947
Q04828	AKR1C1;AKR1C2;AKR1C3;AKR1C4	-0.2892	3.1454	2.4717
Q13541	EIF4EBP1	-0.3085	0.15	0.3991
P23297	S100A1	0.0474	0.2387	0.5029
Q15054	POLD3	0.342	0.9902	0.7675
Q9P2T1	GMPR2	0.2545	0.6958	1.0388
Q86TN4	TRPT1	-1.2211	0.4146	0.381
Q9Y5K6	CD2AP	-0.0335	0.1621	0.2039
Q56VL3	OCIAD2	-0.0596	0.1922	0.0535
Q00577	PURA	-0.5525	1.5187	1.3258
Q14344	GNA13	-0.2358	0.8249	0.6377
Q5RKV6	EXOSC6	-0.4061	1.36	0.021
Q12792	TWF1	-0.0877	0.3904	0.1674
Q9Y276	BCS1L	-0.141	0.293	0.7378
Q16880	UGT8	0.2621	0.6626	0.6104
Q9Y2R0	COA3	-0.7313	1.1166	0.2923
Q4VC31	CCDC58	0.1211	0.2347	0.2068
P42224	STAT1	-0.1786	0.2689	0.4699
P02538	KRT6A;KRT6C;KRT6B;KRT5	-0.0804	1.3713	0.9792
Q96G25	MED8	-0.1571	0.3562	0.0818
P11387	1	-0.0459	0.155	0.0119
P61163	ACTR1A	-0.2404	0.8754	0.2999
Q6ZW49	PAXIP1	-0.0061	0.1066	0.0773
O95865	DDAH2	0.3697	0.436	1.1448
Q9Y2Y1	POLR3K	0.3126	0.6709	0.9082
Q99808	SLC29A1	0.0117	3.5063	1.6456
Q9NVI7-2	ATAD3A	-0.2544	1.4196	0.4418
Q5JRX3	PITRM1	0.0223	0.0298	0.0612
P29692-3	EEF1D	0.2201	0.0577	0.6449
Q13630	TSTA3	0.0583	0.3969	0.0001
J3QR46	KIAA0040	0.5858	0.4968	1.6139
Q12874	SF3A3	-0.0738	0.0557	0.2266
Q15599	SLC9A3R2	0.0636	0.3089	0.5633
Q99417	MYCBP	0.1978	0.3917	0.3087
Q92575	UBXN4	-0.1711	0.082	0.3524
Q9NYZ1	TVP23B;TVP23C	-0.1377	0.1054	0.543
P00505	GOT2	0.3305	0.9299	1.2809
Q765P7	MTSS1L	-0.0759	0.1513	0.2308
O43237	DYNC1LI2	0.1656	0.0165	1.1766
Q13546	RIPK1	-0.078	0.1618	0.1466
Q12840	KIF5A	-1.8694	4.1342	9.4229
Q8N183	NDUFAF2	0.1244	0.4542	0.2749
Q9Y4P3	TBL2	-0.1066	0.0846	0.6625
Q6ZT12	UBR3	-0.01	0.5403	0.5084
Q96B97	SH3KBP1	-0.0093	0.2003	0.1169
Q8N999	C12orf29	-0.2023	0.4083	0.375
Q14738	PPP2R5D	-0.0897	0.0821	0.372
Q00403	GTF2B	0.2219	0.5683	0.6572
Q13405	MRPL49	0.2975	1.1073	0.7459
Q9H967	WDR76	-0.0714	0.0696	0.149
P39687	ANP32A	-0.1326	0.2355	0.3723
Q9HBG6	IFT122	0.4057	0.3517	1.6871
P61011	SRP54	-0.1085	0.3576	0.0478
Q13363	CTBP1	-0.0599	0.0915	0.3056
Q9GZS3	WDR61	0.1432	0.4134	0.2515
P08047	SP1	0.5677	0.6784	0.8608
Q8N543	OGFOD1	0.1138	0.0436	0.4608
Q9H6Z4	RANBP3	0.1594	0.5374	0.3951
Q9UHD8-5	SEPT9	-0.0084	0.1717	0.1392
Q9H6E4	CCDC134	-0.2767	1.8685	0.3313
Q8WXI7	MUC16	-0.1092	0.057	0.5058
Q9BV44	THUMPD3	-0.0809	0.1035	0.2836
H0YAB3	SEC31A	0.2708	0.165	1.8119
Q9BX63	BRIP1	-0.0067	0.0926	0.2442
Q9H2F5	EPC1	-0.0339	0.1749	0.1387
P00390	GSR	0.1424	0.3269	0.3501
O60832	DKC1	0.1167	0.3156	0.2437
Q9GZT6	CCDC90B	-0.0851	0.0988	0.4249
A8CG34	POM121C	-0.0466	0.612	0.1356
Q8IYB3	SRRM1	0.0935	0.6206	0.0143
Q9H869-3	YY1AP1	0.2865	0.4542	0.8551
Q53RE8	ANKRD39	-0.3639	0.286	1.5115
Q9UBB4	ATXN10	0.0978	0.4803	0.0371
Q6WCQ1	MPRIP	0.0189	0.1077	0.1667
Q8IWB1	ITPRIP	0.1532	0.4699	0.1903
Q6P2E9	EDC4	0.0406	0.0214	0.1741
Q92887	ABCC2	0.1685	0.5275	0.147
Q9BY12	SCAPER	-0.1054	0.3826	0.1821
P35606	COPB2	-0.0246	0.0779	0.0545
Q9NQH7	XPNPEP3	-0.0149	0.1828	0.0472
Q5JTW2	CEP78	0.3089	0.5382	0.4237
Q8WWY3	PRPF31	-0.0769	0.054	0.3399
Q9BXB4	OSBPL11	0.198	0.4393	0.4127
P25398	RPS12	-0.1021	0.0519	0.053
O15050	TRANK1	0.1802	0.2088	0.3926
O00399	DCTN6	0.6399	0.7915	1.3017
P61077	UBE2D3;UBE2D2	-0.2754	0.2875	0.568
Q8NCM8	DYNC2H1	-1.3506	2.497	2.3537
Q9BW91	NUDT9	0.1981	0.6803	0.3645
Q8N5C6	SRBD1	0.2443	0.3517	0.7622
Q9UMY1	NOL7	0.0696	0.476	0.0281
B7Z4Q3	C7orf55;LUC7L2	-0.2253	0.2874	0.1463
P60981	DSTN	-0.2221	0.5263	0.3269
A4D1W8	UCC1;EPDR1	-0.3114	0.1966	1.15
Q12769	NUP160	-0.1998	0.1691	0.3693
P41208	CETN2	0.0338	0.2395	0.3391
Q03701	CEBPZ	-0.0542	0.3124	0.0859
O75528	TADA3	0.0557	0.4361	0.0433
P02545	LMNA	-0.2044	0.3505	0.2332
O75534-2	CSDE1	0.0047	0.1695	0.0776
O43715	TRIAP1	0.1729	0.0998	0.5766
Q15428	SF3A2	-0.0391	0.1221	0.0025
Q9GZZ1	NAA50	-0.4666	1.0317	1.1777
Q9ULM3	YEATS2	-0.0062	0.3862	0.321
Q96RU3	FNBP1	-0.283	0.7591	0.3656
Q96DB5	RMDN1	0.2573	0.9926	0.3635
O00231	PSMD11	-0.1454	0.181	0.252
Q15904	ATP6AP1	0.0928	0.386	0.0768
Q8NB91	FANCB	-0.2995	0.4778	0.0838
Q96DH6-2	MSI2	0.0726	0.1506	0.167
Q9NP58	ABCB6	-0.2602	1.5615	0.2244
O15230	LAMA5	-0.5186	1.2264	0.3174
O15440	ABCC5	0.0311	0.0404	0.0558
Q9NVM9	ASUN	0.3549	0.7699	0.9723
P40616	1	0.0126	0.6666	0.5856
P84077	ARF1	-0.2505	0.2731	0.2673
B4DL54	CHURC1-FNTB;FNTB	1.0223	1.219	0.825
P04920	SLC4A2	0.1004	0.095	0.187
Q4L180	FILIP1L	-0.887	0.0971	0.3984
P28290	SSFA2	0.2387	1.0814	0.2955
O75390	CS	0.1597	0.3647	0.3332
Q9NRN9	METTL5	-0.0752	0.412	0.2043
E5RHH0	ATP6V1H	0.084	0.2627	0.5928
Q9UMZ2	SYNRG	0.2505	0.9366	0.6112
Q9BUV8	C20orf24	0.263	0.3214	0.3551
Q9BWH2	FUNDC2	-0.9181	1.2089	1.1581
P13674-2	P4HA1	-0.5467	0.3937	0.3455
P57076	C21orf59	-0.333	0.6279	0.4324
P21964	COMT	-0.1694	0.4832	0.2956
P61160	ACTR2	0.0826	0.1535	0.1412
P11274	BCR	0.0231	0.2435	0.0366
Q9BXS6	NUSAP1	0.4999	1.855	1.3031
Q9Y2D5-6	AKAP2	-0.0418	0.1522	0.012
Q9BSH5	HDHD3	-0.8469	0.963	1.7243
P34059	GALNS	-0.6554	0.7369	0.371
A5D8V7	CCDC151	0.036	0.5852	0.1722
Q05932	FPGS	-0.1783	0.4509	0.0528
Q09472	EP300	0.1783	0.3257	0.2072
Q8N766	EMC1	-0.2159	0.5111	0.4105
Q9Y570	PPME1	0.1276	0.6037	0.3573
O15091	KIAA0391	0.4538	1.3249	1.2422
Q86Y91	KIF18B	0.2039	0.3088	0.4095
P62280	RPS11	0.107	0.3604	0.228
O60675	MAFK	0.0135	0.2343	0.23
Q96AY3	FKBP10	0.0431	0.1565	0.0895
P49590	HARS2	-0.0378	0.1099	0.1224
Q12931	TRAP1	-0.0798	0.3435	0.1518
Q86WC4	OSTM1	0.5153	0.3071	2.2455
Q9Y6X8	ZHX2	0.7641	1.6287	1.5832
Q9NVQ4	FAIM	0.2754	2.0046	0.188
Q8WUF5	PPP1R13L	-0.5725	2.0614	1.3486
Q8TB52	FBXO30	0.5359	0.4653	2.7051
P50402	EMD	-0.3607	1.0347	0.7263
Q9UHB7	AFF4	-0.2873	0.7122	0.1894
P29466	CASP1	0.0364	0.0276	0.0548
H0YHE2	IFT81	-0.1865	0.6175	0.0097
P33908	MAN1A1	0.7779	1.7229	1.5651
P14859	POU2F1;POU2F2;POU2F3	-0.17	0.5576	0.1758
Q5TAX3	ZCCHC11	0.0998	0.3339	0.7387
P63092-3	GNAS	0.6543	1.5586	0.5102
Q96C34	RUNDC1	0.6581	1.1479	1.6306
Q92520	FAM3C	0.1986	0.3784	0.4398
P52272	HNRNPM	0.0423	0.0006	0.2025
O43824	GTPBP6	0.1107	0.1435	0.4527
Q8N0Z3	SPICE1	-0.2891	0.5429	1.3163
P10124	SRGN	-0.0406	0.7582	0.3772
O75717	WDHD1	0.2819	1.9922	0.132
P78346	RPP30	-0.4212	1.4861	0.9488
E7EMZ9	TACC2	0.3144	0.2068	0.7822
Q9BUT1	BDH2	0.6486	0.8854	1.1808
Q96LI5	CNOT6L	0.3017	0.0406	2.1251
Q05655	PRKCD	-0.0745	0.1189	0.4726
Q9HAU0	PLEKHA5	-1.0962	1.2451	0.4338
Q96S55	WRNIP1	0.1245	0.6508	0.0804
Q07960	ARHGAP1	0.0804	0.1735	0.1925
Q9NXC5	MIOS	0.3972	1.184	0.6699
Q9C0C2	TNKS1BP1	-0.4839	1.6604	0.651
Q13136	PPFIA1	0.0077	0.0571	0.0814
P17812	CTPS1	-0.1002	0.4805	0.0889
Q9H6Y2	WDR55	0.1055	0.0491	0.3962
Q16626	MEA1	-0.257	0.1632	1.0492
Q9Y6N5	SQRDL	-0.2758	0.5286	1.1432
E9PHY5	EPB41L2	0.8416	4.8013	4.2247
Q99996	AKAP9	0.0637	0.1506	0.1495
Q15637-5	SF1	-0.0877	0.0528	0.1368
P30520	ADSS	0.3401	1.7536	0.5536
Q9H334	FOXP1	0.0487	0.0247	0.2637
Q68CQ7	GLT8D1	0.2371	0.4596	0.399
O60499	STX10	0.0443	0.1282	0.3069
F8W543	NAP1L1	-0.2277	0.1235	0.8687
P52747	ZNF143	0.2723	0.5586	0.4909
Q9UEU0	VTI1B	0.5144	0.8975	0.6997
Q9UBW7	ZMYM2	-0.068	0.2341	0.1278
Q9P0W2	HMG20B	-0.1653	0.8206	0.1088
P54105	CLNS1A	-0.3136	0.4987	1.0196
Q86YD1	PTOV1	-0.3303	3.1316	0.1018
P20851	C4BPB	0.5591	0.7754	1.5684
Q8N0U8	VKORC1L1	-0.0991	0.0086	0.241
Q9HCE5	METTL14	0.3639	0.7087	0.7291
P24666-2	ACP1	-1.0818	0.1156	0.8448
Q8IYW5	RNF168	-0.1194	0.3652	0.1353
P35914	HMGCL	-0.2225	1.4963	0.502
O43353	RIPK2	-0.0821	0.0072	0.0333
Q00765	REEP5	0.0898	0.1181	0.2483
Q86Y82	STX12	-0.1941	0.6071	1.0108
Q9NV31	IMP3	-0.9229	0.9252	0.1148
Q17R31	TATDN3	0.2073	0.2619	0.0656
Q7Z4H3	HDDC2	0.0037	0.1396	0.2085
O60701	UGDH	0.0218	0.1597	0.2257
Q9UBQ6	EXTL2	0.0924	0.0956	0.3028
P84090	ERH	0.0709	0.4012	0.0722
Q9BSH4	TACO1	-0.0826	0.0219	0.0767
Q07020	RPL18	0.3673	0.7039	0.7388
Q9UJX5	ANAPC4	0.4476	1.424	0.6618
Q9H3N1	TMX1	0.0608	0.2375	0.0651
Q9Y3Q8	TSC22D4	-0.0051	0.2409	0.3774
Q9UQR1	ZNF148	-0.09	0.0435	0.2782
Q01844	EWSR1	-0.4918	2.419	1.0245
Q9Y5X3	SNX5	-0.0199	0.2755	0.1213
Q9H2P0	ADNP	0.311	1.5201	0.8532
Q9Y4R8	TELO2	-0.4552	2.033	0.9817
P30825	SLC7A1	0.9498	1.4354	1.141
H0Y7U4	THOC2	0.122	0.1162	0.4496
O15260	SURF4	-0.1263	0.5912	0.107
Q8N806	UBR7	-0.1524	0.2645	0.0085
Q96AT9	RPE	0.0071	0.2579	0.2351
P52735	VAV2	-0.3641	1.0744	0.3847
Q8NHP6	MOSPD2	0.0859	0.0657	0.4654
Q9Y3X0	CCDC9	-0.62	0.0266	1.0194
Q9UGR2	ZC3H7B	-0.1416	0.0345	0.714
Q13496	MTM1	-0.4416	0.8474	0.5567
Q5T6F2	UBAP2	-0.1536	0.1209	0.1809
P63220	RPS21	0.2432	0.5309	0.5995
O75369	FLNB	0.0218	0.0986	0.1479
Q9HD40	SEPSECS	0.5398	1.4087	1.3994
Q8WWK9	CKAP2	0.628	1.2952	1.6802
Q8NEM2	SHCBP1	-0.1734	0.6068	0.528
Q9H0E9-2	BRD8	0.1106	0.4127	0.0174
Q6ZRQ5	MMS22L	0.2533	0.5436	0.4231
P07195	LDHB	0.0535	0.0871	0.3003
Q92974	ARHGEF2	-0.0337	0.3085	0.0879
Q8TAA5	GRPEL2	0.1827	0.6181	0.0122
P14649	MYL6B	-0.2789	2.0531	0.2581
Q9H8M5	CNNM2	-0.2822	3.3255	0.7768
O75431	MTX2	-0.1764	0.6188	0.2537
Q86TI2	DPP9	-0.0341	0.0228	0.1837
Q15031	LARS2	-0.0336	0.1517	0.0255
Q562R1	ACTBL2	-0.8465	1.5363	0.5543
P56277	CMC4	-0.6197	0.8561	2.1298
Q86V85	GPR180	0.0027	0.0439	0.0266
O15397	IPO8	0.0123	0.2851	0.2222
Q9H9Q2	COPS7B	0.0128	0.2151	0.0372
Q96HA1	POM121	-0.1677	0.6836	0.3326
Q8IX90	SKA3	-0.0851	0.057	0.0993
Q9BTZ2	DHRS4	0.2207	0.0078	1.0041
Q9H299	SH3BGRL3	-0.6217	0.1884	0.8946
Q15021	NCAPD2	0.0184	0.0057	0.0831
Q00839	HNRNPU	-0.0645	0.2041	0.2128
O94905	ERLIN2	0.1098	0.0029	0.4527
P38935	IGHMBP2	0.5397	0.3681	0.7172
Q9UJX4	ANAPC5	0.1738	0.1426	0.5228
Q15287	RNPS1	0.5478	1.2624	1.9642
Q9NYU1	UGGT2	-0.1464	0.1215	0.4059
P19012	KRT15	-0.322	0.0638	0.7158
Q14498-2	RBM39;RNPC2	-0.1366	0.4855	0.2683
Q9NVX2	NLE1	-0.3816	0.6967	0.5818
P06454	PTMA	-0.4912	0.6364	0.1467
P53680	AP2S1	0.124	0.0047	0.5636
Q9BY43	CHMP4A	0.1056	0.3486	0.0872
Q01105-2	SET	0.0295	0.3371	0.0341
Q8IVL5	LEPREL1	-0.2096	0.0418	0.7216
Q9UL40	ZNF346	-0.0818	0.5448	0.0998
Q9GZN8	C20orf27	-0.04	0.3249	0.2069
P56192	MARS	0.0272	0.0834	0.0742
Q14134	TRIM29	0.396	1.0699	0.1529
P25685	DNAJB1	-0.1729	0.1802	0.9604
Q96GQ5	C16orf58	0.0249	0.5611	0.6682
Q9Y2I1	NISCH	0.5358	1.14	0.9596
Q92793	CREBBP	0.1321	0.5219	0.2334
A2RRD8	ZNF320;ZNF91;ZNF808;ZNF578	0.7366	1.7552	0.1411
J3KQT5	KCTD1	0.4433	0.695	0.6011
P22102	GART	0.1526	0.5136	0.2915
P00374	DHFR	0.255	1.1278	0.4691
M0QXA7	WIZ	0.1603	0.3414	0.4485
O95997	PTTG1;PTTG3P	0.4611	1.9428	1.7217
Q99439	CNN2	-0.2573	1.0218	0.441
A4D1P6	WDR91	0.0449	0.1182	0.1666
Q9H4A4	RNPEP	0.2121	0.6377	0.5762
P25789	PSMA4	-0.0902	0.086	0.061
P61964	WDR5	0.1982	0.9796	0.3601
Q9H1C3	GLT8D2	0.174	0.871	0.2572
Q53HL2	CDCA8	-0.0208	0.4297	0.2855
Q14558	PRPSAP1	-0.1206	0.2362	0.3155
Q9NPG3	UBN1	0.1876	0.3857	0.3742
O75298	RTN2	-0.1646	1.5711	0.35
Q7Z333	SETX	0.3956	0.2486	1.1384
Q2TAA2	IAH1	0.1164	0.1648	0.1501
Q96RS6	NUDCD1	0.0294	0.0506	0.0737
P62244	RPS15A	-0.31	0.3791	0.2113
Q9Y4B6	VPRBP	0.0305	0.4657	0.1532
Q9Y2R4	DDX52	-0.0772	0.4243	0.0515
Q14644	RASA3	0.2	0.8408	0.1017
Q7LG56	RRM2B	-0.4458	1.4819	0.4969
Q96LT9	RNPC3	-0.1775	0.0725	0.4087
P47755	CAPZA2	-0.254	0.4442	1.0138
Q14596	NBR1	-0.3117	0.1065	0.444
Q9UGI8	TES	0.1478	0.492	0.3188
Q8N5P1	ZC3H8	0.0837	0.2241	0.0931
Q01196	RUNX1	-1.8723	0.3468	0.3099
Q15390	MTFR1	0.0302	0.0159	0.0919
Q5T5C0	STXBP5	0.113	0.5939	0.0577
Q9NY35	CLDND1	-0.7015	2.0191	2.5524
Q7Z569	BRAP	-0.3843	0.5632	0.1188
Q96QR8	PURB	-0.3765	0.0696	1.2573
P28074	PSMB5	-0.5218	0.4055	0.9771
P30050	RPL12	-0.0211	0.0064	0.0589
Q9NZB2	FAM120A	0.0532	0.2506	0.0774
Q8TF46	DIS3L	0.1171	0.293	0.1542
P35555	FBN1	-0.0371	0.4505	0.3997
O95347	SMC2	0.193	1.2467	0.4539
Q9NZJ6	COQ3	-0.0072	0.0058	0.0579
P83881	RPL36A;RPL36A-HNRNPH2	0.3276	1.1964	1.1514
P46934-4	NEDD4	0.147	0.4236	0.2351
J3QSS6	RAP1GAP	0.2428	2.4672	0.3974
Q96DT6	ATG4C	-0.6148	1.9756	0.7663
Q9NXF7	DCAF16	-0.4457	0.8793	1.0696
O94760	DDAH1	0.0365	0.671	0.3054
Q9BQ75	CMSS1	-0.0169	0.0013	0.0289
Q9ULJ7	ANKRD50	-0.0381	0.05	0.0057
Q6ZS30	NBEAL1	0.0135	0.2794	0.2802
Q9Y6E2	BZW2	0.1644	0.9393	0.3087
P04406	GAPDH	0	0	0
O00391	QSOX1	-0.3492	0.3233	0.4807
Q8IW35	CEP97	0.2362	0.4372	0.3905
Q9BQL6	FERMT1	-0.1647	0.0089	0.4178
Q8WUX2	CHAC2	0.0961	1.2856	0.4298
Q8N1G4	LRRC47	-0.1932	0.3326	0.6058
O14777	NDC80	0.0462	0.1158	0.106
O60271-2	SPAG9	0.0516	0.0295	0.2649
A6NKV8	PAIP1	-0.2598	0.2989	0.523
Q6UW68	TMEM205	-0.653	3.5549	0.3817
Q9H089	LSG1	0.3749	1.0776	1.0916
Q9Y6N7	ROBO1	0.0921	0.4878	0.1358
Q9H3H3	C11orf68	0.2891	0.6345	0.8676
A6NMK8	FAM196B	-0.0441	0.1525	0.0916
Q9UPW5	AGTPBP1	-0.3874	1.9018	0.1456
Q14145	KEAP1	0.3198	0.4163	0.6324
O15357	INPPL1	0.0991	0.3251	0.7725
P00558	1	0.2347	1.055	0.849
Q9C005	DPY30	-0.3567	0.3785	0.5972
Q92692-2	PVRL2	0.7356	1.3439	2.1571
P25205	MCM3	-0.0363	0.1431	0.0885
P31937	HIBADH	0.3322	1.1637	1.202
Q05193	DNM1	-2.0964	0.965	4.948
O43463	SUV39H1	0.5544	1.6354	1.0267
Q8NEF9	SRFBP1	0.14	0.0778	0.7392
Q9Y399	MRPS2	-0.0635	0.0337	0.3462
Q07021	C1QBP	-0.0399	0.0971	0.3039
P07910	HNRNPC	-1.6801	2.0008	1.5882
Q53H12	AGK	0.3456	1.3868	0.3815
Q9Y450	HBS1L	0.2778	0.6559	0.7007
J3QQV6	PNPO	-0.2049	0.784	0.103
Q8IY22	CMIP	-0.2039	0.6015	0.5563
Q15382	RHEB	0.156	0.0379	0.6182
P62875	POLR2L	0.1409	0.3813	0.1462
Q6P6C2	ALKBH5	0.0785	0.006	0.3372
Q13769	THOC5	0.1646	0.2086	0.6767
P49916	LIG3	0.0833	0.1471	0.1953
Q9BX40	LSM14B	-0.0558	0.0845	0.1446
P42167	TMPO	-0.1799	0.6999	0.309
P53621	COPA	-0.0403	0.1221	0.019
P20618	PSMB1	-0.1747	0.9594	0.3322
O43242	PSMD3	-0.1121	0.2045	0.2171
E9PQ57	RAE1	-1.6551	0.2917	6.2253
P49848	TAF6	-0.9836	2.59	0.9308
P36969	GPX4	1.179	2.185	2.3371
Q9NX47	MARCH5	0.0389	0.5256	0.44
Q9C000	NLRP1	-0.506	1.2574	0.1361
Q9BTU6	PI4K2A	0.0975	0.1258	0.2958
O14639	ABLIM1	0.1867	0.1941	0.5272
P49792	RANBP2	0.1035	0.4104	0.2859
Q9UH92	MLX	0.2167	0.3563	0.331
Q14116-2	IL18	-0.4718	0.1034	1.6937
Q9Y4K1	AIM1	0.1115	0.4122	0.5747
P56937	HSD17B7	0.3121	0.9157	0.8281
P42702	LIFR	0.3768	0.8315	0.829
Q9H1I8	ASCC2	-0.1336	0.3252	0.3924
O43399	TPD52L2	-0.0949	0.236	0.1297
O75054	IGSF3	0.29	0.441	0.6882
Q9H211	CDT1	0.1817	0.0489	0.9692
P41247	PNPLA4	0.4973	0.6137	0.966
Q7Z3T8	ZFYVE16	0.2687	0.8744	0.5901
Q71RC2	LARP4	-0.3779	1.9895	0.7766
Q9ULH7	MKL2	0.357	1.0481	0.4421
P47914	RPL29	-0.3004	0.0681	0.3055
P53992	SEC24C	-0.1401	0.4275	0.3491
Q16864	ATP6V1F	0.1885	0.7937	0.3283
P84157	MXRA7	-0.432	0.0653	0.0014
O14733	MAP2K7	-0.6116	0.5321	0.2978
Q8NC51	SERBP1	0.0171	0.0355	0.0368
P26373	RPL13	-0.3145	1.01	0.7195
J3KNF8	CYB5B	-0.3355	0.4137	0.4381
P26583	HMGB2	0.1547	0.4154	0.3034
Q8NBI6	XXYLT1	-0.191	0.6121	0.6177
Q86VP1	TAX1BP1	0.3911	0.7	0.5155
Q9Y5Z9	UBIAD1	-0.5808	1.1076	1.1641
O43172	PRPF4	0.0959	0.2014	0.2605
Q9UHN6	TMEM2	0.028	0.0621	0.0875
Q5SGD2	PPM1L	-0.4784	0.3771	2.3302
Q92503	SEC14L1	0.2789	1.2494	0.0064
Q96DF8	DGCR14	0.3754	1.0553	0.7968
P24928	POLR2A	0.1471	1.5624	0.1172
O43741	PRKAB2	0.3819	1.08	0.5879
Q6PD74	AAGAB	-0.3997	0.9621	0.0669
Q99613	EIF3C;EIF3CL	-0.1383	0.3233	0.5196
Q6PD62	CTR9	0.1051	0.1076	0.4111
Q96S52	PIGS	-0.2841	0.771	0.4371
Q8ND56	LSM14A	0.0576	0.0787	0.323
P51955	NEK2	0.4044	0.6768	0.8372
Q6R327	RICTOR	-0.2101	0.2995	0.4513
Q9BV38	WDR18	-0.6596	1.3805	1.8701
Q9NRW7	VPS45	-0.0322	0.2464	0.0029
Q8N4J0	C9orf41	-0.413	0.1191	1.4854
O43663	PRC1	0.4855	1.476	1.2263
Q8IZP9	GPR64	0.1551	0.6841	0.1245
P36957	DLST	-0.1042	0.1206	0.2692
Q05397	PTK2	0.1913	0.0053	0.7178
Q9NR46	SH3GLB2	-0.344	0.9239	0.6202
P51397	DAP	0.1148	0.7993	0.0269
Q9H147	DNTTIP1	0.5329	0.9347	0.9311
Q9BZ95	WHSC1L1	0.3999	1.2063	1.397
Q86VV8	RTTN	1.566	0.6635	1.3085
Q9Y6G9	DYNC1LI1	0.0188	0.2181	0.2624
J3KNL6	SEC16A	0.0046	0.0268	0.0014
P36776	LONP1	0.0983	0.2604	0.299
P10398	ARAF	0.0655	0.0135	0.2654
P57678	GEMIN4	-0.0629	0.0218	0.2189
P31350	RRM2	-0.1906	0.1652	0.5697
Q9Y5G1	PCDHGB3	-0.383	0.5287	0.4231
Q02543	RPL18A	0.089	0.2135	0.2336
Q8WUQ7	CACTIN	0.3886	1.0051	0.8205
O60333	KIF1B	0.152	0.0531	0.7
Q99590	SCAF11	0.161	0.537	0.2972
Q9HC36	RNMTL1	0.2954	0.9005	0.5948
Q8N6M0	OTUD6B	-0.507	1.889	1.9166
Q9Y4B5-3	MTCL1	0.1515	0.1075	0.681
Q99880	HIST1H2BL	-0.2461	0.6487	0.329
Q00536	CDK16	-0.0832	0.2151	0.5097
Q9Y2L5	TRAPPC8	0.3236	1.2501	0.5007
Q6NUK4	REEP3	-0.0351	0.1509	0.3308
Q6P1N9	TATDN1	-0.2101	0.0118	0.5332
Q16850	CYP51A1	-0.1305	0.3968	0.214
A1L0T0	ILVBL	-0.4798	1.4554	0.6884
P35637	FUS	0.2965	0.8286	0.6251
Q16720	ATP2B3	0.1398	0.3168	0.1465
Q9H8H0	NOL11	-0.0526	0.0492	0.1084
Q9BWT6	MND1	-0.025	0.397	0.2196
Q3KP31	ZNF791;ZFP28;ZNF573;ZNF441;ZNF844	-0.0084	0.2994	0.0545
Q6Y1H2	HACD2	-0.279	0.1506	0.3348
O43852-4	CALU	-0.002	0.0762	0.26
Q92830	KAT2A	-0.2094	0.0538	0.165
Q8IUD2	ERC1	0.2815	1.3538	1.131
Q7L014	DDX46	0.0111	0.0117	0.042
Q92560	BAP1	0.2577	1.2041	0.0166
Q9C0D9	EPT1	0.5999	1.1814	0.9865
Q13596	SNX1	0.0428	0.1281	0.0697
P08195-2	SLC3A2	0.5379	1.8847	2.5205
Q6KC79	NIPBL	0.012	0.0487	0.1058
Q9Y5B6	PAXBP1	0.1778	0.7343	0.3231
Q9UJU6	DBNL	-0.2005	0.823	0.4633
P13861	PRKAR2A	-0.2208	0.6251	0.7238
Q9NWU5	MRPL22	0.4944	1.6976	0.9714
O43677	NDUFC1	0.6054	1.7644	0.9949
Q99700	ATXN2	-0.0762	0.1405	0.0429
Q5MNZ9	WIPI1	-0.8132	2.6727	0.7774
Q9H9T3	ELP3	-0.0757	0.008	0.232
Q96S59	RANBP9	-0.3883	1.1663	0.0308
Q9NYZ3	GTSE1	0.0201	0.5655	0.5366
Q9NV96	TMEM30A	0.5347	0.9263	0.8717
P23610	F8A1	0.079	0.3112	0.0284
P25054	APC	0.235	0.1318	0.5866
P22626	HNRNPA2B1	-0.2987	0.2607	0.3036
O75381	PEX14	0.0006	0.0619	0.0159
P62995	TRA2B	-0.333	0.8429	0.6398
A4D1E9	GTPBP10	0.2648	0.8027	0.7487
Q9H204	MED28	-0.2221	0.7093	0.9338
O75191	XYLB	0.4728	1.7662	0.5115
K7EQ36	ZNF93	0.1496	0.0933	0.5762
A6NKB5	PCNXL2	-0.6929	0.915	3.9592
O75718	CRTAP	-0.0372	0.4807	0.1881
P46087	NOP2	-0.1424	0.3826	0.5175
P01112	HRAS	-0.0518	0.1347	0.2277
Q96BM9	ARL8A	-0.1991	0.014	0.1402
Q9P215	POGK	-0.1193	0.559	0.0176
Q16563-2	SYPL1	-0.101	1.0815	0.4228
A6NED2	RCCD1	0.0562	0.634	0.632
Q86X27	RALGPS2	-0.049	0.3485	0.2481
P42566	EPS15	0.0332	0.6045	0.1959
Q9Y5T5	USP16	0.2693	1.123	0.7458
P55197	MLLT10	0.0194	1.4988	1.4571
Q9UJS0	SLC25A13	-0.065	0.1252	0.1811
Q9UK61	FAM208A	0.089	0.4881	0.1047
P46013	MKI67	0.1884	0.7955	0.4726
Q9UBB9	TFIP11	0.1377	0.6403	0.299
Q3KRA6	C2orf76	0.4372	2.3868	0.7152
O43301	HSPA12A	-0.0572	0.1468	0.1448
Q99805	TM9SF2	-0.2246	0.3971	0.3801
P50224	SULT1A3	-0.0099	0.6588	0.5788
Q10472	GALNT1	-0.1114	0.3188	0.2594
Q53SF7	COBLL1	-0.1082	0.1868	0.2162
Q9NQX4	MYO5C	0.5625	1.0275	0.8945
B4DLN1		-0.2989	0.8321	1.073
Q9UMR2	DDX19B	-0.1548	0.4081	0.3014
Q9HBH0	RHOF	0.5595	3.0436	2.7192
Q6PL24	TMED8	-0.0365	0.4396	0.3152
O75494	SRSF10	-0.6533	0.0029	0.0108
O75146	HIP1R	-0.2044	0.2681	0.7824
Q15149-8	PLEC	-0.1739	1.2497	0.4228
O95816	BAG2	0.0572	0.1777	0.0106
Q9H6R0	DHX33	0.1711	0.8303	0.0137
Q8WYH8	ING5	-0.0313	0.0587	0.0611
Q99707	MTR	-0.1406	0.7782	0.1072
Q8TCD5	NT5C	-0.5233	1.2004	1.3299
O75439	PMPCB	0.0144	0.2562	0.0599
P20962	PTMS	-0.0566	0.0157	0.28
Q9BZZ5-2	API5	0.1235	0.6219	0.1543
Q5UIP0	RIF1	0.1578	0.4635	0.6554
Q9BQC6	MRPL57	-0.5867	1.5862	0.8289
P09001	MRPL3	0.3536	1.3312	0.7261
O15234	CASC3	-0.0204	0.0636	0.1199
O43920	NDUFS5	-0.0359	0.5178	0.7448
P06132	UROD	-0.1403	0.0291	0.7102
Q15018	FAM175B	0.0856	0.4129	0.1299
Q8IWA0	WDR75	-0.0583	0.1595	0.0768
A0MZ66	KIAA1598	0.186	0.0659	1.0214
Q9Y281	CFL2	-0.1426	0.1998	0.5485
Q15942	ZYX	-0.1628	0.3917	0.3114
Q9UIA9	XPO7	-0.0277	0.0394	0.0945
Q92530	PSMF1	-0.3855	2.2844	0.8245
Q9BR61	ACBD6	-0.0346	0.3177	0.103
P25490	YY1	-0.0969	0.6105	0.0521
O15084	ANKRD28	0.0276	0.0158	0.0231
Q99729-3	HNRNPAB	0.3275	1.0368	0.948
Q9HA77	CARS2	-0.3719	1.107	0.6352
Q9BTE6-2	AARSD1;PTGES3L-AARSD1	-0.2177	0.8448	1.0039
Q86XA9	HEATR5A	-0.0969	0.1578	0.1825
P29084	GTF2E2	0.2683	0.7085	0.7727
P43155	CRAT	0.1944	0.164	0.8687
F5HFY4	NAP1L4	-0.3285	0.8592	0.4337
P00966	ASS1	-0.3094	2.3532	0.3977
O75674	TOM1L1	0.0536	0.1649	0.0892
Q13131	PRKAA1	-0.1011	0.3751	0.0607
Q99798	ACO2	-0.0235	0.1251	0.1907
Q15785	TOMM34	-0.0745	0.527	0.0279
P49336	CDK8	-0.2228	0.7531	0.1734
Q9NS91	RAD18	0.2194	0.5545	0.3966
P06737	PYGL	0.4238	1.4425	0.8766
Q8TEA8	DTD1	0.3835	0.5497	0.1949
Q6PJT7	ZC3H14	-0.0081	0.1008	0.0908
O95219	SNX4	-0.2029	1.1266	0.1128
Q7KZ85	SUPT6H	0.2037	0.626	0.4733
Q9Y4P8	WIPI2	-0.6107	2.6871	1.1793
Q8TBM8	DNAJB14	-0.5454	0.8375	0.9779
Q96BW5	PTER	-0.0164	0.6173	0.4837
P49069	CAMLG	0.187	0.0704	0.6846
Q96MF7	NSMCE2	0.2598	0.5376	0.6919
Q8IX04	UEVLD	0.0984	0.057	0.4328
Q14687	GSE1	0.9947	4.6628	3.3839
Q8IV08	PLD3	-0.2339	0.3019	0.7107
Q9NR28	DIABLO	-0.21	0.1737	1.0681
Q96SI1	KCTD15	-0.0756	0.1776	0.2705
P43243	MATR3	-0.8897	2.2252	2.4794
G3V368	GSKIP	-0.3026	2.1254	0.748
Q9UKT8	FBXW2	0.4163	1.6848	0.8657
P49593	PPM1F	-0.064	0.1603	0.0458
P82933	MRPS9	0.2854	1.2614	0.7142
P30046	DDT;DDTL	-0.1449	0.259	0.3507
Q9Y483	MTF2	0.4336	0.5741	1.7397
Q99661	KIF2C	0.1617	0.2588	0.7874
Q0JRZ9	FCHO2	0.3754	0.7007	1.2088
O14975	SLC27A2	-0.535	0.9275	0.25
Q9UQR0	SCML2	0.1049	0.1587	0.1242
Q10570	CPSF1	0.0692	0.7218	0.1331
Q9H6K1	C6orf106	0.351	0.3185	1.3209
Q9NSI2	FAM207A	-0.22	0.2935	0.2419
Q9H825	METTL8	0.1278	0.7277	0.1232
Q9ULI2	RIMKLB	0.0135	0.4355	0.1734
Q8WWL2	SPIRE2	0.5453	1.5946	0.3221
Q9Y385	UBE2J1	-0.7646	2.4387	1.3214
P31947	SFN	-0.0018	0.0203	0.0018
Q8IYI6	EXOC8	0.0576	0.2162	0.4379
P27540	ARNT	0.8961	4.4134	3.0964
Q9NUM4	TMEM106B	-0.8169	2.1992	3.2744
Q7Z2Z2	EFTUD1	0.0989	0.0556	0.4444
P06753-2	DKFZp686J1372;TPM3	-0.0698	0.1574	0.1496
Q9UJF2-2	RASAL2	0.1539	0.0346	0.714
O94763-4	URI1	-0.1174	0.1626	0.3921
Q8TAT6	NPLOC4	-0.0811	0.143	0.1335
P36915	GNL1	-0.0608	0.2914	0.503
P48509	CD151	-1.2262	0.4438	0.0032
Q9Y2P8	RCL1	0.3059	0.6676	0.9907
Q2KHT3	CLEC16A	-0.0525	0.1658	0.3814
Q9BWT3	PAPOLG	-0.383	0.6467	0.8074
Q9H2K0	MTIF3	-0.4834	0.4615	1.4999
E9PIE4	MTCH2	0.9706	1.5932	1.5192
Q16851	UGP2	-0.1633	0.5172	0.3068
Q6IQ32	ADNP2	0.5886	2.3896	0.721
Q8IY81	FTSJ3	-0.1474	0.0122	0.3647
Q8TB03	CXorf38	-0.1796	0.7329	0.0146
Q9NUA8	ZBTB40	0.152	0.3741	0.8378
Q9H8Y8	GORASP2	-0.2357	1.2023	0.1753
Q9NX46	ADPRHL2	0.3437	1.005	0.4715
Q12913	PTPRJ	-0.034	0.0363	0.0913
P27144	AK4	-0.1694	0.9963	0.0708
Q7Z478	DHX29	-0.1117	0.3402	0.0951
Q5U5X0	LYRM7	0.0699	0.0329	0.1144
P09874	PARP1	0.1116	0.3629	0.3429
P09382	LGALS1	-0.2275	1.1265	0.1707
Q9UBD5	ORC3	-0.3459	0.8344	0.9508
Q9HCM4	EPB41L5	-0.0589	0.052	0.2682
Q5VTE6	ANGEL2	-0.1396	1.6079	0.3696
Q9H269	VPS16	-0.2898	0.6046	0.5605
O00522	KRIT1	-0.1747	0.2982	0.9129
P17342	3	-0.1986	0.0578	0.9684
Q96EV2	RBM33	0.2725	1.4214	0.3757
Q5TC84	OGFRL1	-0.0373	0.4444	0.4057
Q5T9A4	ATAD3B	0.159	0.5937	0.1614
Q14667	KIAA0100	0.628	0.941	0.8538
Q9NWS8	RMND1	0.2722	0.0715	1.5038
Q9NPB8	GPCPD1	0.902	0.893	1.0335
Q13613	MTMR1	-0.0075	0.1584	0.0317
Q9Y3C8	UFC1	0.0469	0.1352	0.2941
Q16891-2	IMMT	0.0411	0.1079	0.2974
P37108	SRP14	0.5866	1.8044	1.2384
Q8WXD5	GEMIN6	0.0712	0.5821	0.1272
O95831	AIFM1	-0.0491	0.3032	0.0256
Q6P3W2	DNAJC24;ZCSL3	0.4492	0.0368	1.7427
P55327	TPD52	-0.0447	0.2322	0.0031
Q6XQN6	NAPRT	0.6669	2.2157	1.3586
Q9NQG5	RPRD1B	-0.0295	0.1934	0.2635
Q14147	DHX34	-0.2379	0.7883	0.4931
Q9Y3F4	STRAP	0.0242	0.0056	0.084
P22681	CBL	-0.5549	0.3536	0.1703
Q9HD42	CHMP1A	-0.0087	0.1252	0.0853
Q6RI45	BRWD3	0.6914	0.9649	2.0517
Q9HCS7	XAB2	-0.1613	0.394	0.398
P46781	RPS9	-0.017	0.0259	0.0248
P06865	HEXA	0.0937	0.0274	0.42
Q9H329	EPB41L4B	0.4704	0.9547	0.5532
Q9Y5S9	RBM8A	-0.3759	0.9418	0.9317
Q9UI26	IPO11	-0.1276	0.4917	0.0671
P08195	SLC3A2	0.2953	0.7627	0.8907
Q9H2D1	SLC25A32	0.2251	0.0323	0.6499
Q9UJZ1	STOML2	-0.2424	1.1195	0.3862
O43290	SART1	0.0342	0.0461	0.1339
Q15032-2	R3HDM1	0.2238	1.2887	0.1995
O15235	MRPS12	-1.025	1.3969	2.0733
Q9UBU8-2	MORF4L1	0.0988	0.2161	0.1774
Q9NUQ7	UFSP2	-0.0793	0.3777	0.1172
Q9NWV8	BABAM1	0.1148	0.3333	0.261
O94903	PROSC	0.002	0.003	0.1477
Q9Y2U8	LEMD3	-0.0168	0.1301	0.1119
P61960	UFM1	-0.2835	0.2859	1.4503
Q8IV32	CCDC71	0.6568	0.6459	1.4803
P46776	RPL27A	0.1091	0.246	0.7943
Q8N8S7	ENAH	-0.1926	0.5347	0.2825
Q86V48	LUZP1	-0.1132	0.4286	0.1625
Q8TCY9	URGCP	0.2455	1.0124	0.1295
Q9Y520	PRRC2C	0.1047	0.5682	0.0299
Q92540	SMG7	0.0692	0.2114	0.1109
Q9H9H4	VPS37B	0.2672	1.0512	0.3347
O95487	SEC24B	-0.5426	1.0755	0.4547
Q9NSI6-2	BRWD1	0.1326	0.3554	0.3675
P62258	YWHAE	-0.0673	0.135	0.0968
O43670-2	ZNF207	-0.2171	0.378	0.2606
Q5SW79	CEP170	0.2426	0.8437	0.3339
Q86X76	NIT1	-0.393	1.6255	0.3139
Q96EK5	KIAA1279	0.0049	0.0316	0.118
Q9BT09	CNPY3	0.0554	0.4396	0.0948
P62917	RPL8	-0.2763	0.1523	0.2345
Q14554	PDIA5	0.0954	0.8271	0.1216
P12074	COX6A1	0.1823	0.4927	0.2222
O00429-2	DNM1L	0.0667	0.0224	0.3264
P14866	HNRNPL	-0.2195	0.4395	0.2628
Q9NVS9	PNPO	-0.8326	1.3589	2.1472
Q9NSE4	IARS2	-0.0915	0.0565	0.353
Q9Y6C9	MTCH2	-0.3773	2.1538	0.8445
Q13309	SKP2	0.6105	3.7884	1.4933
Q9NUQ6	SPATS2L	0.4408	1.1389	0.6316
P10620	MGST1	-0.0008	0.3825	0.2674
P15531	NME1	-0.1169	0.0069	0.6143
Q9NTZ6	RBM12	0.1036	0.4053	0.0922
Q8N9T8	KRI1	-0.09	0.299	0.0972
Q15102	PAFAH1B3	0.197	0.6287	0.1734
O43572	AKAP10	0.2087	0.5349	1.0521
P55017	SLC12A3	0.4653	0.7041	1.3562
P21283	ATP6V1C1	-0.0571	0.0604	0.2858
P0CW18	PRSS56	-0.6744	1.2716	1.6046
P05161	ISG15	-1.0026	6.8574	1.8975
P15328	FOLR1	-0.1844	1.373	0.0052
Q15750	TAB1	-0.2754	0.6567	0.566
Q9HAJ7	SAP30L	0.0716	0.1544	0.222
Q8WVM7	STAG1;DKFZp781D1416	0.7315	1.3122	0.9402
Q0VDF9	HSPA14	-0.0217	0.0204	0.0939
Q8WUH1	CHURC1;CHURC1-FNTB	0.2697	0.6741	0.3926
Q12824-2	SMARCB1	-0.1982	0.1908	0.4075
Q05209	PTPN12	-0.1862	0.8676	0.1796
Q5VWQ8	DAB2IP	0.3725	1.2678	0.6725
Q96AE7	TTC17	0.0183	0.7013	0.3245
Q96RD7	PANX1	0.1798	0.4381	0.0282
O96019	ACTL6A	-0.1516	0.4334	0.525
P53007	SLC25A1	-0.1347	0.0941	0.2053
Q9NR09	BIRC6	0.2686	0.6851	0.4957
O00161	SNAP23	0.0072	0.0458	0.0775
P10070	GLI2	0.2192	0.1357	0.5047
O00232	PSMD12	0.1866	0.5133	0.7858
P84022	SMAD3	1.064	2.6876	5.1147
Q14CZ7	FASTKD3	-0.4133	1.6647	0.6196
Q96Q06-2	PLIN4	0.5361	0.744	0.6118
Q9HCD6	TANC2	-0.3567	1.8086	0.0201
Q86WV6	TMEM173	0.3256	0.2603	0.838
Q9NZJ4	SACS	0.1228	1.6479	0.4996
O95453	PARN	0.2092	0.3408	0.57
P55084	HADHB	0.1603	0.373	0.5629
Q9NPA0	EMC7	-0.8065	2.0834	3.813
Q96F07	CYFIP2	0.2561	0.5359	0.3467
P17152	TMEM11	-0.1489	0.7318	0.2258
Q9BYC9	MRPL20	0.1229	0.5682	0.0769
[truncated: 4,489 more rows]
