# Supplementary material for: Quantitative Proteomics and Differential Protein Abundance Analysis after the Depletion of PEX3 from Human Cells Identifies Additional Aspects of Protein Targeting to the ER
Source: Int J Mol Sci. 2021 Dec 1;22(23):13028. doi: 10.3390/ijms222313028 (PMC8658024; doi:10.3390/ijms222313028)
Supplement: Supplementary file 1 [file ijms-22-13028-s001.zip › Table S2_pex_3_full_lo.xlsx]

## Sheet: Sheet 1
Accession	Gene	Full protein name	log2 fold change	Subcellular location	SS or TMH	Glycosylation sites	SP or TMH seq.
B4DEV8			-5.20232
P56589	PEX3	Peroxisomal biogenesis factor 3	-3.49416	Peroxisome membrane	TMH	0	CIFLGTVLGGVYILGKYGQKK
Q8TAP6	CEP76	Centrosomal protein of 76 kDa	-2.36694	Centrosome, Microtubule organizing center, Centriole, Cytoplasm, Cytoskeleton		0
P51991	HNRNPA3	Heterogeneous nuclear ribonucleoprotein A3	-2.10372	Nucleus		0
O95164	UBL3	Ubiquitin-like protein 3	-2.00723	Cell membrane		0
Q92629	SGCD	Delta-sarcoglycan	-1.93846	Cytoplasm, Sarcolemma, Cytoskeleton, Cell membrane	TMH	3	FFVLLLMILILVNLAMTIWIL
O95503	CBX6	Chromobox protein homolog 6	-1.58858	Nucleus		0
Q15366-2	PCBP2	Poly(rC)-binding protein 2	-1.56129	Nucleus, Cytoplasm		0
A6NKN8	PCP4L1	Purkinje cell protein 4-like protein 1	-1.51032			0
Q8IY95	TMEM192	Transmembrane protein 192	-1.43745	Late endosome, Lysosome membrane	TMH	0	TVIIVNLLWFIHLVFVVLAFL
Q99943	AGPAT1	1-acyl-sn-glycerol-3-phosphate acyltransferase alpha	-1.2749	Endoplasmic reticulum membrane	SP	0	MDLWPGAWMLLLLLFLLLLFLLPTLW
Q8WUZ0	BCL7C	B-cell CLL/lymphoma 7 protein family member C	-1.22845			0
H7C463	IMMT		-1.079
