# Supplementary material for: Quantitative Proteomics and Differential Protein Abundance Analysis after the Depletion of PEX3 from Human Cells Identifies Additional Aspects of Protein Targeting to the ER
Source: Int J Mol Sci. 2021 Dec 1;22(23):13028. doi: 10.3390/ijms222313028 (PMC8658024; doi:10.3390/ijms222313028)
Supplement: Supplementary file 1 [file ijms-22-13028-s001.zip › Table S3_pex_3_Zellweger_all.xlsx]

## Sheet: Sheet 1 - pex_2_all_summary_2
ID	Gene name	Fold change	Neg. log10 p-value
O95551	TDP2	0.0308	0.127
Q6IQ22	RAB12	0.5489	1.8185
P60033	CD81	-0.6817	1.1372
O60573	EIF4E2	0.0659	0.1578
Q13885	TUBB2A	0.2253	0.8489
O60524	NEMF	0.0127	0.0524
Q86U90	YRDC	0.4628	1.6461
P61966	AP1S1	0.8434	3.6169
Q9UKT5	FBXO4	-0.1053	0.1553
Q08499-6	PDE4D	0.3918	0.8555
Q9UGU0	TCF20	0.2231	0.777
Q14978-3	NOLC1	0.1149	0.3418
P47897	QARS	0.2576	1.0162
Q9Y3E7	CHMP3	0.1113	0.267
P09429	HMGB1;HMGB1P1	-0.2007	0.7634
Q8WW59	SPRYD4	-0.6151	1.1818
Q00169	PITPNA	-0.0738	0.3191
A7E2V4	ZSWIM8	-1.683	1.9278
P49750-4	YLPM1	0.059	0.2127
E9PF99	CEP192	0.3795	1.6928
Q5TZA2	CROCC	-0.4252	1.8215
P52948	NUP98	0.1511	0.466
Q99622	C12orf57	0.3033	0.5528
Q8TF72	SHROOM3	-0.0862	0.2934
Q9UPZ3	HPS5	1.1055	3.5247
Q8TF68	ZNF384	-0.3191	0.9174
Q53GA4	PHLDA2	0.2607	0.3131
Q9BYN0	SRXN1	-0.5911	1.1122
P05230	FGF1	0.7965	2.0833
Q14331	FRG1;FRG1B	0.0079	0.0731
Q92466	DDB2	-0.2614	0.4821
Q96DE5	ANAPC16	0.0049	0.0059
Q00653	NFKB2	0.6794	1.9683
Q9HB07	C12orf10	-0.2073	0.4097
Q86YR5	GPSM1	-0.106	0.2219
Q04656	ATP7A	-0.2999	0.7102
Q8N8A6	DDX51	0.2956	0.7417
Q9GZV5	WWTR1	-0.1802	0.4816
Q16795	NDUFA9	-0.1598	0.4456
P82921	MRPS21	-0.2746	1.1003
Q96Q15	SMG1	0.2012	0.1772
Q01780	EXOSC10	0.3196	1.0859
Q9Y2T3-3	GDA	-3.2294	5.8914
Q8IZ81	ELMOD2	1.2133	2.6904
Q5VTR2	RNF20	-0.5112	1.758
Q99471	PFDN5	0.4173	1.2959
Q96DG6	CMBL	0.0812	0.3956
Q9GZU8	FAM192A	0.0054	0.0162
P33764	S100A3	-0.779	4.5468
O94916	NFAT5	0.1386	0.2443
Q9NQ50	MRPL40	-0.175	0.654
P49588	AARS	0.0094	0.0445
O43683	BUB1	-0.0507	0.1726
P32418-2	SLC8A1	0.3275	0.4458
Q15014	MORF4L2	-0.5693	1.3988
Q9BQ61	C19orf43	-0.0823	0.2286
P25440	BRD2	0.0858	0.3285
O75616	ERAL1	-0.7305	1.7389
Q9Y3C6	PPIL1	-0.0626	0.0723
P27695	APEX1	-0.4453	1.156
Q16181	SEPT7	-0.3701	1.048
P58335	ANTXR2	-0.0982	0.2806
O94776	MTA2	0.3347	0.7561
Q92979	EMG1	0.0452	0.1674
Q8NCH0	CHST14	0.0782	0.1518
Q92620	DHX38	0.0269	0.0768
Q96E11	MRRF	-0.1813	0.6119
Q9UH99	SUN2	0.3075	1.7467
P49116	NR2C2	-0.2394	0.4699
Q15363	TMED2	0.0247	0.0299
Q7KYR7	BTN2A1	-2.5298	3.2435
Q6PGP7	TTC37	-0.0922	0.239
Q9NY61	AATF	0.2931	0.5441
Q9H1D9	POLR3F	-0.1326	0.4558
Q8NF91	SYNE1	0.3926	0.8428
F8W9B5	PRC1	0.4957	1.7824
Q4AC94	C2CD3	1.2608	5.0739
Q9NYK5	MRPL39	-0.071	0.3487
Q92871	PMM1	0.5319	1.8204
Q01543	FLI1	0.8317	2.6944
Q9NPI1	BRD7	-0.2091	0.5118
Q9H7D0	DOCK5	0.0842	0.3306
CON__P17690	APOH	-0.1747	0.3194
P11413	G6PD	-0.0341	0.0484
P09493-3	TPM1	-0.0452	0.2127
Q7Z3K3	POGZ	0.195	0.6975
Q9Y5N6	ORC6	0.2805	0.6873
P62081	RPS7	-0.0129	0.0349
Q9NR31	SAR1A	-0.1156	0.3503
Q14166	TTLL12	0.5435	1.6464
Q9H4E7	DEF6	-0.4958	0.8003
Q9BT25	HAUS8	0.5724	1.2862
Q8WUR7	C15orf40	0.0673	0.1065
O95167	NDUFA3	-0.1373	0.2358
P11234	RALB	-0.3488	1.2916
P14635	CCNB1	-0.249	1.5876
O75937	DNAJC8	0.0141	0.0063
O60885	BRD4	-0.0728	0.2519
P22392	NME2	-0.5209	0.1948
O75525	KHDRBS3	0.6281	0.3266
Q9H223	EHD4	0.0454	0.1131
Q13464	ROCK1	-0.451	1.9208
Q8NHP8	PLBD2	0.4789	1.2433
Q7Z6E9	RBBP6	0.1153	0.3347
P50148	GNAQ	-0.1344	0.312
Q8NB49	ATP11C	0.3833	0.8559
P32519	ELF1	0.0833	0.276
Q9UNP9	PPIE	0.1214	0.3162
Q5QJE6	DNTTIP2	0.1748	0.6757
Q93096	PTP4A1	0.201	0.3075
Q8N983	MRPL43	-0.1821	0.3688
Q9H553	ALG2	0.221	0.6503
Q86XK3	SFR1	-0.6822	1.1607
Q15836	VAMP3	-1.4181	3.9308
Q13472	TOP3A	-0.0911	0.1485
O43464	HTRA2	-0.1942	0.6609
Q9Y6X3	MAU2	-0.304	0.6591
Q93100	PHKB	-0.4031	1.599
Q9BVI4	NOC4L	-0.0414	0.1578
Q9NSK0	KLC4	0.0638	0.072
Q96CV9	OPTN	-0.0252	0.0564
P51946	CCNH	-0.2902	0.5175
Q04637	EIF4G1	-0.0259	0.1022
Q86SZ2	TRAPPC6B	0.5493	1.7842
Q9NRG9	AAAS	-0.5226	0.8599
Q96RS0	TGS1	-0.2815	0.4746
Q15361	TTF1	-0.5581	0.1852
Q53EZ4	CEP55	-0.8083	1.562
Q9NYG2	ZDHHC3	-0.2358	0.1236
Q01968	OCRL	0.247	0.9593
P43007	SLC1A4	-0.559	1.0996
Q8N9N7	LRRC57	0.5892	1.1481
Q9H0A8	COMMD4	0.4752	1.3427
Q9BQA1	WDR77	-0.4824	0.8376
P46777	RPL5	-0.2567	0.7404
O60749	SNX2	-0.0967	0.4343
C9JLW8	FAM195B	-0.2623	0.642
Q9H7X7	IFT22	-1.8264	1.7449
Q8IUH4	ZDHHC13	-0.0865	0.1878
Q15796	SMAD2	0.358	0.4373
P30307	CDC25C	0.2282	0.2598
Q8IWX8	CHERP	-0.2142	0.6119
Q9BW27	NUP85	-0.2607	1.0887
Q02252	ALDH6A1	-0.7435	4.0996
P38435	GGCX	-0.0838	0.2005
Q9BYV8	CEP41	0.6294	1.9881
Q8NEZ2	VPS37A	0.3302	0.8887
P17029	ZKSCAN1	-0.4006	0.5932
Q09666	AHNAK	0.0725	0.1135
P25445	FAS	-0.2187	0.6122
Q16585	SGCB	-0.0874	0.5433
Q6UXH1-6	CRELD2	0.4262	1.1058
Q99598	TSNAX	0.0503	0.1625
Q9BY50	SEC11C	-0.1977	0.63
Q9NZJ5	EIF2AK3	0.3063	1.4947
Q15139	PRKD1	-0.046	0.1396
Q96FQ6	S100A16	0.6225	3.7806
P10746	UROS	-0.1367	0.3977
Q14197	ICT1	0.119	0.4178
Q9H0E2	TOLLIP	-0.2532	0.7758
P49914	MTHFS	-0.0891	0.0564
Q9NPI6	DCP1A	0.8518	2.4279
Q02818	NUCB1	-0.5074	2.0305
Q96KA5	CLPTM1L	0.3165	0.8362
Q5QJ74	TBCEL	0.067	0.2434
P58511	SMIM11	0.4186	1.13
Q6UWJ1	TMCO3	0.0375	0.1484
Q9NR48	ASH1L	5.6983	0.6643
Q9Y5B0	CTDP1	-0.2332	0.4328
P60484	PTEN	0.4725	1.6632
Q9Y3A5	SBDS	0.092	0.3011
P43235	CTSK	-0.4961	0.6197
O60229	KALRN	0.1495	0.588
P80723	BASP1	-0.9252	1.4884
P37268	FDFT1	-0.1706	0.5961
P51114	FXR1	-0.2073	0.8875
P20340-2	RAB6A	0.201	1.087
Q9HD34	LYRM4	0.3761	0.8078
A1A4S6	ARHGAP10	0.1284	0.2642
Q9UJY1	HSPB8	-1.0345	2.1936
Q9P227	ARHGAP23	-0.0107	0.0566
P40337	VHL	0.7336	4.9469
Q9UBR2	CTSZ	-0.562	0.9875
Q5TYW1	ZNF658	-0.1606	0.3545
O15111	CHUK	0.4253	0.8981
Q13277	STX3	-0.3272	1.0008
Q92945	KHSRP	-0.0776	0.2071
Q70SY1	CREB3L2	0.6409	2.1151
Q7Z3B1	NEGR1	0.0542	0.0427
E9PGF5	TNS1	-1.0432	5.5178
Q14671-2	PUM1	0.1752	1.0864
K7EK63		-0.1195	0.0656
Q9HC77	CENPJ	-0.025	0.054
Q15057	ACAP2	-0.6538	2.6964
Q8N3C0	ASCC3	-0.128	0.3213
P23258	TUBG1;TUBG2	0.3251	1.1239
Q9BQ69	MACROD1	0.6537	1.4814
Q9NUP7	TRMT13	0.4011	1.1516
Q8WUF8	FAM172A	-0.156	0.3729
Q13033-2	STRN3	-0.2338	1.1722
O15460	P4HA2	-0.4269	0.707
Q6P1A2	LPCAT3	-0.0401	0.0478
O43929	ORC4;ORC4L	0.0698	0.1271
H0YCK3	ADAR	-0.5872	3.0497
P12236	SLC25A6	0.2837	1.496
O75496	GMNN	-1.8202	2.0209
P98179	RBM3	0.0863	0.1628
P00338-4	LDHA	0.5411	2.3451
Q9P0W5	SCHIP1;IQCJ-SCHIP1	-0.2928	0.7782
Q9NV56	MRGBP	-0.501	1.3095
J3QLA6	PPP4R1	-0.4564	0.753
Q9BXW7	CECR5	-0.4411	1.3611
Q969R8	ITFG2	0.8775	2.7649
O76070	SNCG	0.5784	0.9583
Q8NBS9	TXNDC5	0.0541	0.103
Q86YT6	MIB1	0.3023	0.7454
Q9UK45	7	-0.9828	2.0065
Q99715	COL12A1	-0.2199	0.8032
Q14318-2	FKBP8	-0.2356	1.2159
P83436	COG7	0.147	0.4445
Q8WU76	SCFD2	0.0528	0.0963
P58546	MTPN	-0.1499	0.354
Q86UL3	AGPAT6	0.3751	1.4883
Q15046	KARS	-0.1651	0.5179
P05120	SERPINB2	0.6403	0.3551
Q6EEV4-2	POLR2M	-0.5303	0.3901
Q14691	GINS1	-0.25	0.6316
Q15029	EFTUD2	0.394	1.7487
Q5VT25	CDC42BPA	0.2322	0.698
O75155	CAND2	0.7382	2.2107
A6NKF1	SAC3D1	-0.2496	0.5973
Q5PRF9	SAMD4B	-0.0091	0.0366
Q8NFD5	ARID1B	0.3167	1.3018
Q9Y375	NDUFAF1	-0.6702	1.0025
Q96FJ0	STAMBPL1	0.055	0.1676
Q9BQ70	TCF25	0.325	1.037
Q6PI48	DARS2	-0.0532	0.1555
Q9BZH6	WDR11	0.3652	0.6365
Q7Z5K2	WAPAL	0.3003	1.6964
Q06787	FMR1	0.0445	0.1064
Q8WU90	ZC3H15	-0.1738	0.7708
Q7Z422	SZRD1	-0.7573	0.4622
Q9Y3C5	RNF11	0.0593	0.1107
P33981	TTK	-0.3152	1.4742
O75251	NDUFS7	0.2774	0.7239
P26006	ITGA3	-0.7254	1.8552
Q8IX01	SUGP2	0.0587	0.1668
P13929	ENO3	0.2241	0.6408
P51970	NDUFA8	-0.0186	0.1031
G3V0I6	OTUD4	0.2701	1.0047
Q8WWH5	TRUB1	0.6622	2.8751
Q15293	RCN1	-0.3775	1.0884
P18084	ITGB5	-1.2778	4.0714
Q8TC12	RDH11	0.1631	0.3696
O00767	SCD	-0.389	1.369
Q15435	PPP1R7	-0.0717	0.172
P31150	GDI1	0.1751	0.7205
Q14157	UBAP2L	0.0004	0.0669
P78560	CRADD	1.1625	3.6013
Q76M96	CCDC80	-1.1102	3.7809
Q7LFL8	CXXC5	0.1656	0.5156
Q96BR5	COA7	0.3894	1.102
Q9Y2K2	SIK3;KIAA0999	0.8229	0.8913
Q8IXI2	RHOT1	-1.0066	4.0513
P49023	PXN	0.0484	0.1849
Q9Y4W2	LAS1L	-0.0847	0.2727
P56378	MP68;C14orf2	-0.5524	1.4049
Q92925	SMARCD2	-0.1888	0.3912
Q53H82	LACTB2	0.0058	0.0856
Q8NDX5	PHC3	-0.0498	0.1929
P31948	STIP1	0.1336	0.5471
O00743	PPP6C	0.3373	0.8162
O15069	NACAD	0.1846	0.3516
Q5T3J3	LRIF1	-0.2234	0.5867
Q07955	SRSF1	0.0563	0.0239
Q7L273	KCTD9	1.4185	2.35
Q9NYP9	MIS18A	-0.2897	0.6316
P82970	HMGN5	0.7423	0.7688
Q99766	ATP5S	1.3883	2.2246
O43303	CCP110	0.5685	1.1688
Q9UHP3	USP25	-0.0293	0.083
Q16658	FSCN1	0.2159	0.9349
Q495W5	FUT11	-0.2646	0.4652
Q9BY89	KIAA1671	-0.3757	0.725
Q13362	PPP2R5C	0.5806	1.5167
Q9Y478	PRKAB1	-0.0839	0.1566
J3KN66	TOR1AIP1	-3.5191	8.6164
O75152	ZC3H11A	0.1547	0.4791
P78559	MAP1A	0.2787	1.3827
Q6UB35	MTHFD1L	0.2696	0.9978
P61978-3	HNRNPK	-0.019	0.0632
O76024	WFS1	-0.4955	3.1509
Q16719	KYNU	-0.015	0.4282
Q9NQC7	CYLD	0.6879	1.4695
Q15063	POSTN	-1.2059	1.5832
Q96PY5	FMNL2	-0.617	2.0142
Q86Y07	VRK2	0.1682	0.6944
O95985	TOP3B	0.4154	1.2457
H0YKA5	IQGAP1	-0.3907	1.0362
Q9UGP8	SEC63	-0.1039	0.2252
P33240	CSTF2	-0.4949	0.9901
P29728	OAS2	1.4358	4.7949
E7EVA0	MAP4	0.2084	0.8217
Q7L3T8	PARS2	0.2263	0.8179
Q16539	MAPK14	0.416	1.7522
Q9H1Y0	ATG5	-0.0588	0.1179
Q9GZX9	TWSG1	1.6552	1.7473
P27707	DCK	0.1835	0.7557
I3L2B0	CLUH	0.0339	0.2178
Q9H0H5	RACGAP1	-0.1671	0.3125
Q9NR30	DDX21	0.0229	0.0747
Q7Z4G4	TRMT11	0.0771	0.1769
Q96CS3	FAF2	-1.7387	2.2717
Q9H5V8	CDCP1	-1.7898	4.5253
P82663	MRPS25	-0.0061	0.0815
Q8WXA9-2	SREK1	0.3618	0.6588
O14908	GIPC1	-0.7213	0.7406
Q8NG68	TTL	-0.0251	0.1095
P23511	NFYA	-0.0727	0.0191
P08238	HSP90AB1	-0.529	1.7056
P61923	COPZ1	-0.2248	0.4298
P10515	DLAT	0.2068	0.6055
Q5JTH9	RRP12	0.1928	0.7365
P83111	LACTB	0.0785	0.2735
Q9UHV9	PFDN2	-0.2174	1.13
P29323	EPHB2	0.3184	0.729
Q9BUT9	FAM195A	1.5112	1.4225
Q8N335	GPD1L	0.0272	0.0876
P07099	EPHX1	-0.0267	0.1126
Q9Y3T6	R3HCC1	0.1892	0.3578
P35226	BMI1;COMMD3-BMI1	-0.2318	0.5622
Q9BXP2	SLC12A9	0.7021	1.1625
Q96AT1	KIAA1143	-0.7319	1.1276
P46459	NSF	-0.1578	0.7066
Q9BZE4	GTPBP4	0.0873	0.2885
Q8TD30	GPT2	-0.618	0.3247
Q15404	RSU1	0.01	0.0379
Q5SW96	LDLRAP1	-0.5245	1.0336
Q02809	PLOD1	0.0621	0.0725
O43149	ZZEF1	0.2714	0.9951
O43159	RRP8	-0.3519	0.8376
M0QYT0		-0.047	0.1747
P42771	CDKN2A	0.5886	0.8631
O60437	PPL	-0.6169	0.0866
Q969N2	PIGT	0.3342	0.7252
Q3B726	TWISTNB	-0.1055	0.0735
O75419-2	CDC45	0.5117	1.764
Q2TAA5	ALG11	-0.2288	0.3897
O00567	NOP56	-0.1573	0.4333
Q9NRR4	DROSHA	0.3415	0.6542
P40261	NNMT	-0.3614	1.9415
P05121	SERPINE1	-0.0452	0.0861
Q08117	AES	-0.2425	0.2826
P30101	PDIA3	-0.1316	0.5969
Q86X02	CDR2L	0.0846	0.2152
Q96K17	BTF3L4	-0.0932	0.2116
P45984	MAPK9	0.3102	0.8865
Q96EX1	SMIM12	-0.2211	0.6709
Q8NEJ9	NGDN	-0.0179	0.0863
Q9HB19	PLEKHA2	0.3286	1.1334
Q8TDM6	DLG5	0.2252	0.6737
Q9Y4W6	AFG3L2	-0.0962	0.2929
Q08043	ACTN3	-2.5789	2.4079
Q8N3V7	SYNPO	-0.1477	0.3458
O94874	UFL1	0.2367	0.752
Q8N954	GPATCH11	-0.0442	0.1403
P62316	SNRPD2	0.1083	0.3321
P22087	FBL	-0.1249	0.0985
Q8WX92	NELFB	0.0037	0.0009
P07437	TUBB	0.0658	0.3188
Q9NQS1	AVEN	0.0431	0.133
Q5VZ89	DENND4C	0.0746	0.145
Q15124	PGM5	0.209	0.5378
P51151	RAB9A	0.0914	0.1636
P53597	SUCLG1	0.056	0.2199
O15427	SLC16A3	-0.9612	1.2415
P80303	NUCB2;Nucb2	0.1023	0.401
Q8IWZ8	SUGP1	0.3092	0.9986
P40855	PEX19	-0.3915	0.7939
P17858	PFKL	0.527	2.8145
Q9UHD9	UBQLN2	-0.9047	0.7945
P54619	PRKAG1	-0.2537	0.6039
Q15436	SEC23A	0.0234	0.0845
Q92734	TFG	-0.3065	0.6616
Q9HAP2	MLXIP	-0.4973	2.8044
P49720	PSMB3	-0.0028	0.0227
Q8IWY9	CDAN1	1.1177	3.1173
Q9BYG3	NIFK	0.5289	1.4535
P06400	RB1	0.6586	0.9845
Q9P258	RCC2	-0.5846	2.051
Q53H80	AKIRIN2	-0.0065	0.0379
O76031	CLPX	-0.0942	0.2933
Q9UL01	DSE	-0.2885	0.4825
Q96MU7	YTHDC1	-0.3752	1.0112
P46778	RPL21	0.19	0.4114
Q8TC07-2	TBC1D15	0.0935	0.2238
Q9Y613	FHOD1	-0.2039	0.9582
Q8TF76	GSG2	0.1728	0.9004
P22695	UQCRC2	-0.1935	0.5588
Q96FS4	SIPA1	-0.6114	1.2922
P51149	RAB7A	-0.1654	0.4408
P27797	CALR	-0.6331	2.1359
Q86XI2	NCAPG2	-0.0789	0.3232
H0YIV9	GATC	-0.0412	0.1586
Q9H9L4-4	KANSL2	0.0393	0.0244
O75920-2	SERF1A	-1.0882	1.8369
Q92989	1	0.4989	1.3406
P48730-2	CSNK1D;CSNK1E	-0.5858	2.7025
Q9HBL7	PLGRKT	0.1841	0.1515
P21333	FLNA	0.3381	1.1418
Q9NZN5	ARHGEF12	0.667	3.7269
O75695	RP2	0.4976	2.3091
Q6DN90	IQSEC1	0.3144	1.0677
Q6NUK1	SLC25A24	0.7773	2.5605
Q5R372	RABGAP1L	0.2486	0.7284
Q96PU8	QKI	0.0889	0.2333
Q86V97	KBTBD6;KBTBD7	0.4896	1.9255
Q9NZE8	MRPL35	-1.8554	2.4188
P47712	PLA2G4A	-0.8096	4.3632
P30085	CMPK1	0.2825	1.1684
O75394	MRPL33	0.0063	0.1614
Q5C9Z4	NOM1	-0.0695	0.0268
Q9HB58-4	SP110	1.4466	1.8943
Q06265	EXOSC9	0.1212	0.3279
Q15050	RRS1	0.4973	1.9602
E9PBK4		-0.678	1.0167
Q96SF7	TBX15	0.8292	2.5746
Q7LBR1	CHMP1B	-0.211	0.6684
P07093-2	SERPINE2	-1.6704	2.4511
P05412	JUN	0.4884	0.2131
Q14746	COG2	0.1882	0.5104
Q969R5	L3MBTL2	0.3132	0.6918
O43909	EXTL3	0.1396	0.4728
P54687	BCAT1	0.1921	0.4133
Q96MD7	C9orf85	-1.13	1.02
P35030	PRSS3	0.3809	1.2594
Q13459	MYO9B	0.2075	0.874
P40121	CAPG	0.2709	0.9036
Q6VMQ6	ATF7IP	0.2064	0.3468
Q8WVK2	SNRNP27	0.6737	2.2192
Q9NYL4	FKBP11	-0.3093	0.6702
Q9Y3B8	REXO2	0.0657	0.1437
Q99966	CITED1	1.7971	5.2182
P0DI81	TRAPPC2;TRAPPC2B	0.0895	0.1553
P78406	RAE1	0.1221	0.3652
Q9HD33	MRPL47	-0.0801	0.1803
Q9UPN6	SCAF8	-0.1921	0.4974
Q9NUW8	TDP1	0.3773	1.7452
Q9Y5A7	NUB1	-0.3817	1.3531
Q9H2W6	MRPL46	-0.1425	0.5166
Q9UKN8	GTF3C4	-0.0325	0.1074
Q9NVZ3	NECAP2	0.6852	1.6861
Q9UJX3	ANAPC7	0.106	0.3652
Q69YN4	KIAA1429	0.1058	0.3082
Q8N684	CPSF7	0.1215	0.4769
Q5HYI7	MTX3	0.3178	0.5527
O95563	MPC2	0.2807	0.5096
P27361	MAPK3	-0.5232	1.8958
Q9BUE0	MED18	0.1733	0.5004
P17014-4	ZNF12	-1.4489	1.5912
P30530	AXL	0.5186	2.9841
O75648	TRMU	0.7219	3.4918
Q9P0U1	TOMM7	0.2868	0.2322
P15311	EZR	-0.1704	0.6117
Q9UPQ9	TNRC6B	0.3396	1.9468
Q96MN5	TCEANC2	0.6077	1.8451
P21912	SDHB	-0.1207	0.3959
P22413	ENPP1	-1.0711	5.709
Q9NRX2	MRPL17	0.1623	0.3827
O15504	NUPL2	0.1304	0.4445
Q12788	TBL3	-0.2728	0.6416
Q9Y5L0	TNPO3	0.5213	1.594
Q92743	HTRA1	-1.4291	4.5141
Q9H5U6	ZCCHC4	-0.0931	0.3977
Q99836	MYD88	0.565	1.3366
O00442	RTCA	0.0087	0.047
P38606	ATP6V1A	-0.5765	3.7233
O95183	VAMP5	-0.0216	0.1011
P49841	GSK3B	-0.2576	0.6023
O15155	BET1;DKFZp781C0425	0.4572	1.189
Q13595	TRA2A	-0.2418	0.2035
Q71RG4	TMUB2	-1.888	5.5707
Q9BZ67	FRMD8;FRMD8P1	0.2903	1.0412
P46100	ATRX	0.1533	0.3287
Q9H3S7	PTPN23	0.2366	0.7862
Q3ZCW2	LGALSL	0.471	0.632
P62906	RPL10A	0.3036	0.816
Q15393	SF3B3	-0.1596	0.3854
Q9HB71	CACYBP	-0.4629	1.3435
O00443	PIK3C2A	0.2128	0.9016
P07858	CTSB	-0.8746	3.4573
P61158	ACTR3	-0.1569	0.6803
Q9NP80	PNPLA8	0.0993	0.222
Q9H6S0	YTHDC2	-0.2149	0.7499
Q9H788	SH2D4A	-0.7005	3.7395
Q7L5D6	GET4	-0.2109	0.5405
Q9Y2F5	ICE1	1.0308	2.8505
Q14651	PLS1	0.3739	1.3065
Q9UJA5	TRMT6	0.3681	1.1515
H0YD69	MACF1	-0.4176	1.4464
P35754	GLRX	-0.0451	0.127
P62249	RPS16	-0.1338	0.4705
Q15388	TOMM20	0.2881	0.9237
O15381	NVL	0.1857	0.4423
Q96G21	IMP4	-0.1159	0.3468
Q9Y6J9	TAF6L	0.1511	0.291
Q16666	IFI16	0.0591	0.212
O14967	CLGN	0.6549	2.6434
Q5TA45	CPSF3L	0.1768	0.31
O60313	OPA1	-0.4915	1.3586
H0YAR2	PABPC1	0.4415	1.7472
P58317	ZNF121	0.9447	2.4749
Q15012	LAPTM4A	0.5435	1.7586
O00401	WASL	-0.2233	0.3981
Q13043	STK4	-0.0126	0.0471
P18858	LIG1	-0.0099	0.0294
O60518	RANBP6	0.1639	0.5222
Q8NC60	NOA1	-0.4693	1.6341
Q6UW63	KDELC1	0.8572	2.2397
O60942	RNGTT	0.1409	0.4508
Q9UBQ7	GRHPR	0.1929	0.5557
P41226	UBA7	0.3576	1.8966
O15054	KDM6B	-0.516	0.6797
P20290-2	BTF3	0.0592	0.2405
Q8IX12	CCAR1	0.1056	0.4222
O75347	TBCA	-0.9537	1.8127
E9PMS6	LMO7	-0.7322	4.0802
P25788	PSMA3	-0.106	0.3769
O14647	CHD2	0.2142	0.3244
Q9P2P1	NYNRIN	-0.5682	1.8308
Q8WUP2	FBLIM1	1.209	2.1715
Q9BXI6	TBC1D10A	-0.6569	0.6356
Q12979	ABR	-0.0065	0.0243
Q9Y383	LUC7L2	-0.0807	0.3377
P62241	RPS8	0.035	0.0924
O95298	NDUFC2	-0.8771	1.7113
Q9NVV0	TMEM38B	-1.2709	0.2387
Q9UPU9	SAMD4A	0.7165	3.3813
O95248	SBF1	-0.5035	1.6077
Q9HD26	GOPC	0.1645	0.5192
B4DLE8	CRYBG3	0.2372	0.7116
P19474	TRIM21	0.6099	2.0848
Q9BTV4	TMEM43	0.0219	0.0251
P08133	ANXA6	-0.3786	1.222
Q9BUL8	PDCD10	-0.0425	0.0486
Q9H082	RAB33B	0.2632	0.5537
Q70Z53	FRA10AC1	-0.1128	0.3045
Q969Z3	MARC2	0.2425	0.4564
P23634	ATP2B4	0.7149	3.5781
Q9NX20	MRPL16	-0.3499	0.7122
Q9HB09	BCL2L12	0.1942	0.5615
O14929	HAT1	-0.0292	0.128
B4DFK6	CNN3	-0.199	0.4405
P50281	MMP14	-0.3863	1.6083
Q9ULJ3	ZBTB21	-0.0313	0.1304
Q96I99	SUCLG2	-0.193	0.7631
O60488	ACSL4	-0.0955	0.282
Q13439	GOLGA4	-0.1263	0.4645
P10071	GLI3	-1.0074	1.2615
P11217	PYGM	-0.1549	0.6752
P67870	CSNK2B;CSNK2B-LY6G5B-1181	-0.0215	0.0376
Q9P2K5	MYEF2	-0.0964	0.2803
Q13084	MRPL28	0.021	0.0198
Q8N3D4	EHBP1L1	0.0009	0.0357
P23396	RPS3	0.1317	0.7416
P47895	ALDH1A3	-3.5699	11.8934
P21359	NF1	0.0172	0.0351
Q8N129	CNPY4	0.0973	0.4281
P56181	NDUFV3	-0.981	4.9618
I3L312	P4HB	-0.2962	0.887
Q9UDY2	TJP2	-0.1003	0.3536
P22570	FDXR	-0.2592	0.5739
O75629	CREG1	1.018	1.9935
Q9UBP6	METTL1	0.0056	0.0435
Q96BX8	MOB3A	0.0402	0.0976
P67936	TPM4	-0.7529	1.4551
O95721	SNAP29	0.1003	0.3063
Q14186	TFDP1	0.1618	0.44
O95881	TXNDC12	0.0473	0.1494
O75164	KDM4A	0.7644	2.5077
O14497	ARID1A	0.1486	0.454
Q96PZ0	PUS7	0.0603	0.2124
O95861	BPNT1	-0.0854	0.199
Q96B45	C10orf32	0.5244	1.1706
Q08379	GOLGA2	-0.3251	1.1926
Q86VM9	ZC3H18	-0.1289	0.3473
Q13542	EIF4EBP2	0.227	0.3473
Q7Z4H7	HAUS6	0.2499	0.9246
Q16799	RTN1	0.0067	0.0277
Q9UHB6	LIMA1	-0.1771	0.5702
Q13618	CUL3	-0.1859	0.7642
Q99717	SMAD5;SMAD1	-0.313	0.921
O75665	OFD1	0.4574	1.2561
Q9UBT2	UBA2	0.122	0.4721
Q2TB10	ZNF800	0.4141	1.0007
Q8NI27	THOC2	0.0909	0.3963
P05783	KRT18	-0.4357	0.2541
Q9NZV5	SEPN1	1.18	5.1279
F5H604	CLASP2	0.3054	1.9861
Q13813-3	SPTAN1	0.2535	1.1464
Q9UNZ5	C19orf53	0.192	0.6662
Q96IX5	USMG5	-0.3545	1.5589
Q6BDS2	UHRF1BP1	-0.0409	0.0531
P61313	RPL15	0.1286	0.4666
O00754	MAN2B1	-0.0025	0.0067
Q969V6	MKL1	-0.0862	0.2973
O95571	ETHE1	0.3308	0.3964
Q5VW32	BROX	0.0104	0.0354
P22307	SCP2	-1.8367	7.4566
Q86W42	THOC6	0.3869	0.4127
Q96GD0	PDXP	0.4849	1.2417
P33778	HIST1H2BB;HIST2H2BE;HIST1H2BO;HIST1H2BJ	0.7553	1.6375
P18583-5	SON	0.1262	0.5315
G5E9M5	ILF3	0.0142	0.0516
Q9Y5K8	ATP6V1D	-0.2249	0.6068
Q96GN5	CDCA7L	-0.0242	0.1107
Q9C0B5	ZDHHC5	0.2232	0.5156
Q02078-2	MEF2A	0.2649	1.3394
Q9NPH3	IL1RAP	0.2053	0.5041
Q8TF74	WIPF2	0.5639	1.2182
O43815	STRN	0.2307	0.6868
Q66K74	MAP1S	-0.1684	0.4617
B7Z468	CAST	-0.1837	0.5452
P26358	DNMT1	0.0002	0.0152
Q9H9C1	VIPAS39	0.1376	0.4829
G3V5T0	GSTZ1	-0.9593	0.5914
Q13085	ACACA	-0.331	1.8133
Q56P03	EAPP	-0.2158	0.4999
Q15022	SUZ12	-0.617	1.3631
Q5W0V3	FAM160B1	0.2465	1.3674
P50748	KNTC1	0.3199	1.2803
Q9HD67	MYO10	-0.2894	1.2628
O75663	TIPRL	0.0641	0.18
Q68D10	SPTY2D1	0.1736	0.4897
O94887	FARP2	-0.1968	0.4512
Q9H1K1	ISCU	-0.4024	1.0338
D6RED7	RPS3A	-0.5906	1.119
Q9Y6K9	IKBKG	0.1918	0.7317
Q8ND24	RNF214	0.1969	0.5401
Q9HB90	RRAGC;RRAGD	-0.1277	0.4281
Q9NQB0-10	TCF7L2	0.2373	0.7797
Q86YS6	RAB43	0.0874	0.1733
Q92947	GCDH	0.0295	0.0785
Q5SY16	NOL9	0.0288	0.1018
P15848	ARSB	0.0192	0.0866
Q96SU4	OSBPL9	-0.0971	0.2968
P62979	RPS27A	-0.0235	0.0766
P26885	FKBP2	-0.1259	0.4127
Q9UBU9	NXF1	-0.1553	0.3394
Q14141	SEPT6	-0.3214	1.0757
P10586	PTPRF	0.7782	1.5791
Q5JTD0-4	TJAP1	0.2098	0.546
Q7LGA3	HS2ST1	0.0139	0.23
Q9H8Y5	ANKZF1	-0.1487	0.2124
O94979	SEC31A	0.0313	0.1213
O95980	RECK	-0.1942	0.4583
P12110	COL6A2	-2.1327	3.6906
O00470	MEIS1;MEIS2;MEIS3	0.0467	0.0872
P14735	IDE	0.0938	0.2878
Q8N2Z9	APITD1	-0.0294	0.0246
Q9H1E3	NUCKS1	0.1283	0.1267
Q5VZM2	RRAGB;RRAGA	0.0086	0.0527
Q03135	CAV1	-0.377	1.309
P61006	RAB8A	-0.5866	1.0029
P49840	GSK3A	0.1641	0.4848
Q9BS40	LXN	0.8226	1.3166
O43805	SSNA1	0.2388	0.5237
Q9Y2W2	WBP11	0.0792	0.1062
Q7L576	CYFIP1	0.1528	0.5371
Q5T8P6-2	RBM26	0.3602	0.9866
P17213	BPI	0.3314	0.7616
P49321	NASP	-0.1012	0.3473
P61513	RPL37A	0.1777	0.5096
Q92900	UPF1	-0.0672	0.2387
Q5F1R6	DNAJC21	-0.1197	0.167
Q8IZ21	PHACTR4	-0.1785	0.4633
Q70E73	RAPH1	0.0696	0.1892
P54252	ATXN3	-0.1833	0.8988
Q8NDV3	SMC1B	-0.1222	0.5247
Q92905	COPS5	0.1198	0.2319
Q9BZV1	UBXN6	-0.112	0.2802
O95084	PRSS23	-1.3113	4.1471
Q9H792	PEAK1	0.0879	0.1541
P52435	POLR2J;POLR2J2;POLR2J1;POLR2J3	0.2195	0.8999
Q8TB72	PUM2	0.1013	0.5165
P62857	RPS28	-0.4075	0.5188
P38117	ETFB	-0.4188	1.5351
P78371	CCT2	0.0108	0.0338
Q9H0U3	MAGT1	0.3526	0.5855
Q8IXQ6-3	PARP9	-0.1203	0.2641
Q9H6F5	CCDC86	0.1499	0.6863
Q8IYB1	MB21D2	0.2185	0.5629
Q12882	DPYD	-0.2513	0.7462
O75489	NDUFS3	-0.2331	0.9265
Q9NY33	DPP3	0.1591	0.7275
O15535	ZSCAN9	-0.2155	0.7257
O95825	CRYZL1	-0.2695	0.6287
Q9H1B7	IRF2BPL	0.313	0.8815
Q96TA2	YME1L1	0.0631	0.2396
Q6GMV3	PTRHD1	0.5124	1.5615
Q08752	PPID	-0.0454	0.0527
Q86VI3	IQGAP3	0.7535	2.6767
P22830	FECH	-0.0725	0.1356
P61619	SEC61A1;SEC61A2	0.1818	0.5829
Q9BTX1	NDC1	-0.77	0.98
Q9Y5S2	CDC42BPB	-0.023	0.0978
P62847	RPS24	0.1827	0.6582
Q9Y4L1	HYOU1	0.0527	0.2083
Q9H999	PANK3	0.588	1.9815
Q9Y6E0-2	STK24	0.1428	0.495
P07954-2	FH	-0.0236	0.0845
Q9Y2X3	NOP58	0.0318	0.1075
Q9H0K1	SIK2	-0.1486	0.5307
Q86U28	ISCA2	0.1402	0.325
Q5VV52	ZNF691	-0.5457	2.5664
O60256	PRPSAP2	0.3118	1.3587
Q9BZX2	UCK2	0.215	1.0509
Q5HYK7	SH3D19	0.158	0.3478
K7ENF0	NARS	-0.3602	0.6866
Q5T0D9	TPRG1L	-1.0772	1.6896
B4DY08	HNRNPC	0.0142	0.061
Q8N3F8	MICALL1	0.9	3.7526
Q96NT0	CCDC115	-0.7243	1.2088
Q3KQV9	UAP1L1	0.315	0.4864
Q9UM00	TMCO1	0.2211	0.3986
Q9UKS6	PACSIN3	0.0008	0.2338
Q969S3	ZNF622	0.0111	0.0851
Q9Y2R5	MRPS17;hCG_1984214	-0.1476	0.2981
Q8NEY8	PPHLN1	0.4142	1.4713
Q96EL3	MRPL53	0.0053	0.194
O75153	CLUH	-0.1076	0.6517
O75521	ECI2	-0.6358	1.773
Q10588	BST1	0.553	1.9656
Q96ED9	HOOK2	-1.2162	1.6179
P20700	LMNB1	0.0584	0.2238
Q9Y446	PKP3	-4.1045	4.016
O15514	POLR2D	-0.2927	0.5251
Q9UKY7	CDV3	-0.6937	1.8578
P46108	CRK	0.4193	1.3228
O60828	PQBP1	0.071	0.2435
P46734	MAP2K3	0.8448	2.8516
P51858	HDGF	-0.4112	0.935
O43747	AP1G1	0.0071	0.0241
Q13227	GPS2	0.7991	1.2865
Q13356	PPIL2	0.1586	0.9764
Q9UHW5	GPN3	0.2695	0.7022
P11532	DMD	0.3047	1.1932
Q27J81	INF2	0.1847	0.6337
Q96N11	C7orf26	0.1849	0.7269
Q676U5	ATG16L1	-0.0509	0.025
P37235	HPCAL1;HPCA	-0.0089	0.0967
Q86WP2	GPBP1	-0.509	1.0757
Q8WUB8	PHF10	0.2091	0.4603
P31483	TIA1	0.2194	0.5589
P50995	ANXA11	-0.7741	2.302
Q9H074	PAIP1	0.4504	2.5462
Q96KM6	ZNF512B	0.355	1.0001
O75368	SH3BGRL	-0.1345	0.2878
Q9C0C9	UBE2O	-0.0781	0.2528
Q9UNZ2	NSFL1C	0.0473	0.0589
Q9Y6Q9	NCOA3	-0.0186	0.0949
Q15652	JMJD1C	-0.3116	1.8232
Q6NSJ5	LRRC8E	0.0246	0.1199
O60870	KIN	-0.156	0.4686
Q9NUP9	LIN7C	-0.3949	0.7016
Q14011	CIRBP	0.4594	1.482
Q08945	SSRP1	0.2567	1.1437
Q9UDT6	CLIP2	0.5692	1.4885
P08670	VIM	-0.6175	1.9292
Q00534	CDK6	0.1565	0.3362
P53618	COPB1	0.2085	1.1283
Q7L9L4	MOB1B;MOB1A	0.1185	0.3857
Q8WTS1	ABHD5	1.8847	5.7917
Q14061	COX17	-0.1444	0.1933
O43617	TRAPPC3	-0.0617	0.0914
O43813	LANCL1	-0.4823	0.6733
O60427	FADS1	0.142	0.4076
O14653	GOSR2	0.4398	0.995
Q3SY77	UGT3A2	-0.0995	0.3186
Q9UJY4	GGA2	0.0905	0.1184
Q96SW2	CRBN	-0.5163	1.7068
Q9UN37	VPS4A	0.1612	0.3021
Q6PIW4	FIGNL1	-0.7825	0.7143
Q96BT3	CENPT	0.4672	1.1044
P53367	ARFIP1	-0.0555	0.2058
O95810	SDPR	-0.339	0.9921
P04632	CAPNS1	0.5122	2.6626
Q13485	SMAD4	0.2564	0.6382
O60315	ZEB2	0.3549	0.5524
P27348	YWHAQ	-0.3845	1.1994
P49454	CENPF	-0.0651	0.2847
Q9BX68	HINT2	0.0332	0.1364
Q8TBC4	UBA3	0.882	2.1262
Q14684	RRP1B	0.0933	0.3704
Q96L92	SNX27	-0.0212	0.1187
P60900	PSMA6	0.212	1.2575
Q7Z6K3	PTAR1	0.943	3.8282
P40227	CCT6A	0.212	0.6287
Q52LW3	ARHGAP29	-0.2487	0.5857
Q96BK5	PINX1	0.1154	0.2809
P37173	TGFBR2	0.0004	0.0439
O75592	MYCBP2	0.3921	0.5279
Q71UM5	RPS27L	-0.7387	1.3347
P07947	YES1	0.1124	0.4803
P61457	PCBD1	0.044	0.0247
Q9BXJ9	NAA15	0.2412	1.2261
Q13190	STX5;STX5A	-0.3056	0.8507
Q12873	CHD3	0.0079	0.0221
Q99829	CPNE1	0.0517	0.0986
P55081	MFAP1	-0.716	1.2644
P35221	CTNNA1	0.0953	0.4455
Q8IWB7	WDFY1	0.1988	0.2041
A5D8V6	VPS37C	0.3222	1.0135
Q5TKA1	LIN9	0.8785	1.3421
Q9UHK0	NUFIP1	0.8205	0.8594
Q7Z4W1	DCXR	0.6766	0.9819
H7C0S8		-0.2777	1.081
Q01628	IFITM3	0.4522	1.4112
Q9UKZ1	CNOT11	-0.0614	0.1339
P78362	SRPK2	0.3122	0.5266
H0YH82	CS	0.5612	0.1269
Q7Z7H5	TMED4	0.1308	0.4731
O14530	TXNDC9	-0.2686	0.8734
O14893	GEMIN2	-0.7189	0.8884
P40763	STAT3	-0.3051	1.6964
B4DGT0		-0.1702	0.7677
Q9UKG9	CROT	0.5391	2.4221
Q6PKG0	LARP1	0.0952	0.3518
P46821	MAP1B	0.4591	0.997
P27824	CANX	0.0373	0.1527
Q9NRR3	CDC42SE2	-0.0422	0.1955
Q96HR9	REEP6	-0.1351	0.4343
Q5VIR6-4	VPS53	0.5652	1.4792
O60888-3	CUTA	0.1191	0.1624
Q96CW5	TUBGCP3	0.1965	0.7783
Q10713	PMPCA	0.0013	0.0028
Q12907	LMAN2	-0.0279	0.0542
Q9Y639	NPTN;DKFZp566H1924	0.0516	0.1231
Q9BZ29	DOCK9	0.2323	0.5313
Q96AB3	ISOC2	0.209	0.3887
O95777	8	0.0452	0.086
Q6IQ26	DENND5A	-0.6827	2.0913
O60231	DHX16	0.2319	0.3787
Q07666	KHDRBS1	-0.0936	0.3317
Q9H4I3	TRABD	-0.5328	0.5964
P51991-2	HNRNPA3	-0.8641	1.41
Q9Y4A5	TRRAP	0.2262	0.5253
Q9GZR1	SENP6	0.0629	0.2199
P33176	KIF5B	0.1402	0.5033
Q96AC1	FERMT2	0.4685	1.9646
C9JGZ7	TLE6	-0.1581	0.3931
O75874	IDH1	-0.1044	0.5264
Q96RT1	ERBB2IP	0.1228	0.4128
O95379	TNFAIP8	0.0813	0.0132
A3KN83	SBNO1	-0.2303	0.9865
P26639	TARS	-0.0722	0.3734
Q969G5	PRKCDBP	-0.2129	0.2678
E7EQ69	NAA50	-0.8898	1.3915
Q9Y676	MRPS18B	-0.6387	2.434
Q9UPT5	EXOC7	0.2637	1.3562
Q9NS87	KIF15	0.0331	0.1253
P63261	ACTG1	-0.0988	0.3893
P50238	CRIP1	-1.8879	4.7781
Q13332	PTPRS	-0.1005	0.1856
P46063	RECQL	0.0303	0.1216
P01106	MYC	0.0698	0.1718
Q9BZJ0	CRNKL1	0.1164	0.2573
P62195	PSMC5	-0.1022	0.3577
P23470	PTPRG	0.191	0.5714
Q96LJ7	DHRS1	-0.2499	0.2764
P49419-2	ALDH7A1	0.1419	0.5318
Q13724	MOGS	-0.0282	0.0953
P82930	MRPS34	-1.0875	1.7617
Q15165	PON2	0.0447	0.0768
Q9UKL0	RCOR1	0.1445	0.5408
Q9Y4K0	LOXL2	-0.5197	1.2139
P39656	DDOST	-0.018	0.0764
P62070	RRAS2	-0.017	0.1692
Q8NBJ5	COLGALT1	-0.263	0.8762
Q7Z392	TRAPPC11	0.1386	0.4328
Q2M1P5	KIF7	0.3474	0.6737
O00764	PDXK	-0.1708	0.5215
P30043	BLVRB	-0.3922	1.3953
Q9Y324	FCF1	0.1303	0.3091
Q7Z4G1	COMMD6	0.1097	0.1058
D3YTG3	ABI3BP;DKFZp667H216	-1.4658	3.2276
P53990	IST1	0.0336	0.1391
P42025	ACTR1B	0.4222	2.1282
Q9Y6M5	SLC30A1	-0.2384	0.7968
E7ENI6	ICA1	0.3411	0.7801
Q9Y243	AKT3	0.1741	0.3813
Q9BR76	CORO1B	0.2504	0.7048
P27708	CAD	0.2148	0.6666
P62736	ACTA2	0.6473	1.3394
O60925	PFDN1	0.0862	0.0837
Q9H1H9	KIF13A	-0.0907	0.1952
A6NKT7	RGPD3	0.3287	0.9091
Q16401	PSMD5	0.2044	0.5608
P84095	RHOG	-0.2729	0.7432
Q96E39	RBMXL1	0.0968	0.2841
Q9HAN9	NMNAT1	0.2707	0.2837
O76094	SRP72	-0.3292	1.1133
P49354	FNTA	0.6078	1.956
Q9NP97	DYNLRB1	-0.2633	0.5291
Q92733	PRCC	-0.3121	1.3019
P61421	ATP6V0D1	-0.1537	0.6209
Q70CQ2	USP34	0.0845	0.3236
P14209	CD99	-1.2429	1.3802
Q9NTX5	ECHDC1	0.2057	0.5731
Q96S19	C16orf13	0.33	0.9375
Q96SB8	SMC6	-0.0563	0.0884
Q96J42	TXNDC15	0.1295	0.2965
Q9Y5J1	UTP18	-0.1247	0.5421
Q9P2G1	ANKIB1	-0.2972	1.5862
Q8NHU6	TDRD7	0.1683	0.4359
Q9UGN5	PARP2	0.021	0.0658
Q5T5Y3	CAMSAP1	-0.2493	0.259
O75891	ALDH1L1	-0.3276	0.8596
Q01415	GALK2	-0.1466	0.4036
Q96I51	WBSCR16	0.2143	0.5455
P13473-2	LAMP2	0.0912	0.3076
A3KMH1	VWA8	-1.3415	1.2327
Q9UIF9	BAZ2A	-0.0346	0.1498
Q16531	DDB1	-0.0174	0.0647
G3V1Q4	SEPT7	0.3569	1.7629
Q9UQB8-5	BAIAP2	0.116	0.4932
P31040	SDHA	-0.1164	0.1807
Q9Y2Y0	ARL2BP	0.4381	0.7416
O95470	SGPL1	0.3341	1.2884
Q9UET6	FTSJ1	-0.2982	0.2086
Q14240	EIF4A2	-0.5366	1.7882
Q9NRK6	ABCB10	1.5381	3.8166
Q9UPY8	MAPRE3	-0.1924	0.5477
Q06787-8	FMR1	0.2854	1.0569
O94925-3	GLS	0.215	1.0316
Q8TB36	GDAP1	-0.0075	0.1275
Q9BYW2	SETD2	0.5945	1.6469
Q9BWH6	RPAP1	-0.4458	0.3508
O96006	ZBED1	1.2984	2.0091
Q9BSD7	NTPCR	0.0631	0.1818
P31943	HNRNPH1	-0.1369	0.504
Q02487	DSC2	-0.427	0.5497
Q9Y285	FARSA	-0.1261	0.5307
Q92930	RAB8B	-0.6445	1.518
P05413	FABP3	-2.0616	8.3509
Q14146	URB2	0.0685	0.1829
O75832	PSMD10	-0.0381	0.1234
O95425	SVIL	-0.5466	1.2049
P62826	RAN	-0.1029	0.3043
Q8NBF6	AVL9	-0.4862	0.831
O43164	PJA2	-0.3963	0.1265
P62273	RPS29	-0.3202	0.6133
Q9H6B4	CLMP	-0.382	0.2026
Q9H201	EPN3	0.4516	0.4889
P15408	FOSL2	-0.1457	0.228
P36542	ATP5C1	0.03	0.0894
P08397	HMBS	0.3856	2.2305
H3BQF6	METTL10	1.4077	3.3455
Q9ULH0	KIDINS220	0.123	0.1027
O15305	PMM2	0.2956	1.0585
P12956	XRCC6	-0.1519	0.5508
P78357	CNTNAP1	0.1691	0.3674
P35579	MYH9	0.0899	0.2558
Q6YP21	CCBL2	-0.5607	3.4739
P15559	NQO1	0.0354	0.09
Q3YEC7	RABL6	0.6943	1.1359
Q9NQR4	NIT2	-0.0621	0.0844
P63000	RAC1;RAC3	-0.2684	0.6223
E9PC44	SEC24D	0.4745	1.4155
P46783	RPS10;RPS10P5	-0.0284	0.1225
Q99459	CDC5L	-0.1156	0.365
P55201	BRPF1	0.2209	0.4358
O75179	ANKRD17	0.3373	1.001
Q9H0X4	ITFG3	-0.1727	0.1803
P61254	RPL26;RPL26L1	0.0163	0.0849
A8MXV4	NUDT19	0.2112	0.6165
Q6N069	NAA16	0.4509	0.6288
Q9BW19	KIFC1	0.0538	0.1655
Q96CX2	KCTD12	0.4038	1.7828
O95628-4	CNOT4	0.2154	0.4877
Q12899	TRIM26	0.3051	0.7795
Q9BYX2	TBC1D2	0.0764	0.1036
P35237	SERPINB6	0.3462	1.9102
Q9BUF5	TUBB6	0.0646	0.2486
Q86YV5	SGK223	-0.8192	3.209
Q9BWF3	RBM4	-0.0453	0.0953
P18859	ATP5J	-0.2348	0.798
Q7Z401	DENND4A	0.3791	1.3057
Q14790-9	CASP8	-0.8906	1.6902
H7C3E0	CTDSP1	0.1056	0.3854
Q9NVP1	DDX18	0.0368	0.0743
Q8TBZ6	TRMT10A	-0.3193	0.2019
P13591	NCAM1	4.502	9.191
Q9NY27	PPP4R2	-0.1288	0.3386
Q9NX14	NDUFB11	-0.4717	0.9554
Q9Y5V0	ZNF706	0.0987	0.1885
Q9HC35	EML4	-0.3212	1.3206
Q86UV5	USP48	0.0724	0.2669
Q8NCN5	PDPR	-0.3694	1.1515
Q9H2M9	RAB3GAP2	0.4634	0.8964
Q86X83	COMMD2	-0.1524	0.7031
Q99797	MIPEP	0.1013	0.2673
O43504	LAMTOR5	0.277	0.7628
P19404	NDUFV2	0.0475	0.1164
B0YJ81	HACD1	0.2178	0.3691
Q66GS9	CEP135	0.2844	0.7507
P21589	NT5E	-0.2032	0.5154
Q9UM54	MYO6	0.157	0.643
Q7Z2W4	ZC3HAV1	0.0678	0.2293
Q96GD4	AURKB	0.1335	0.3224
P52943	CRIP2	0.9037	2.1239
Q08431	MFGE8	-1.3326	3.8148
Q15477	SKIV2L	-0.4701	1.6237
Q9GZT4	SRR	-0.5935	1.2224
Q5T9L3	WLS	0.2627	0.4129
Q8N3X1	FNBP4	-0.002	0.0233
Q9H061	TMEM126A	-0.6784	1.3044
P16930	FAH	-0.611	2.1737
F8W726	UBAP2L	-0.7585	1.0159
P40429	RPL13A	0.0551	0.1878
Q14257	RCN2	0.083	0.2436
Q9Y6R4	MAP3K4	1.4909	1.8328
Q92785	DPF2	0.1472	0.4174
Q9P2W9	STX18	0.2372	0.6068
Q6UVK1	CSPG4	-0.1876	0.4844
P62495	ETF1	-0.0477	0.1407
Q9NZL9	MAT2B	0.1223	0.3223
P51784	USP11	0.6813	1.4444
P49761	CLK3	-0.5412	0.9007
Q5JSL3	DOCK11	0.2163	0.9476
Q96EB6	SIRT1	0.5103	2.1114
Q96EI5	TCEAL4	-0.2804	0.7329
Q14678	KANK1	-0.9217	0.3679
Q6ULP2	AFTPH	0.533	0.9901
Q8NEM7	SUPT20H	0.619	2.6699
Q8TF65	GIPC2	0.3421	0.6349
Q8IWF2	FOXRED2	0.4717	0.4461
Q8TAE8	GADD45GIP1	-0.1698	0.3532
Q99640	PKMYT1	-0.2658	0.5402
Q9BUQ8	DDX23	0.1877	0.519
Q99497	PARK7	-0.2298	0.7229
Q8TBB5	KLHDC4	0.1576	0.3344
Q9Y2V2	CARHSP1	0.0982	0.3663
O43426	SYNJ1	0.1069	0.3462
Q13247	SRSF6	-0.1823	0.2839
Q9H7C4-2	SYNC	-0.7067	0.3496
E9PDZ8	DLC1	0.9722	2.6758
O94851	MICAL2	0.4692	2.0339
O00139	KIF2A	-0.0579	0.2237
Q9UJY5	GGA1	-0.2388	0.5645
Q9NVF7	FBXO28	-0.395	0.3739
Q99719	SEPT5	0.0655	0.1194
Q86UQ4	ABCA13	0.3486	0.5826
Q9UMY4	SNX12	0.1213	0.3597
Q12768	KIAA0196	-0.0002	0.0157
Q14315	FLNC	0.5559	3.2241
Q9UBL3	ASH2L	0.1537	0.5409
Q6L8Q7	PDE12	0.1925	0.5132
Q12968-5	NFATC3	-0.2125	0.2408
Q9H993	ARMT1	0.1326	0.3999
P09651	HNRNPA1;HNRNPA1L2	-0.7024	1.8841
P13667	PDIA4	-0.1757	0.8275
P98174	FGD1	0.2237	0.7472
Q9NVT9	ARMC1	-0.264	0.6479
P28749	RBL1	0.0917	0.2786
Q12923	PTPN13	0.763	2.088
P38432	COIL	-0.6303	1.22
P28482	MAPK1	0.0792	0.1939
P62256	UBE2H	0.188	0.5562
Q14152	EIF3A	-0.0164	0.0617
Q9UPU5	USP24	-0.0352	0.0814
O75503	CLN5	0.3728	1.1673
Q13185	CBX3	0.0153	0.0029
Q9UKT7	FBXL3	0.1569	0.6539
O95639	CPSF4	0.36	0.6979
P06493	CDK1	0.0002	0.0041
P61221	ABCE1	-0.2592	1.4653
Q9UQ03	CORO2B	2.6528	5.9762
P15529-4	CD46	-0.8156	1.1158
Q04760	GLO1	0.0585	0.127
Q13325	IFIT5	0.4051	1.4871
Q13017	ARHGAP5	0.3982	1.1443
Q96G28	CFAP36	-0.1845	0.4835
Q8N5K1	CISD2	0.21	0.6667
Q53G59	KLHL12	0.3883	0.0287
P50990	CCT8	0.1548	0.5623
Q7KZF4	SND1	-0.1571	0.7733
O94985	CLSTN1	0.5154	0.6692
Q96PZ2	FAM111A	-0.176	0.325
Q9NQP4	PFDN4	-0.4112	0.9024
Q7Z7B0	FILIP1	-0.2884	0.7059
Q8TEQ6	GEMIN5	-0.0491	0.1327
Q13435	SF3B2	-0.1426	0.5435
Q8N5W9	FAM101B	0.5531	1.1848
Q8NDA8	MROH1	2.1557	6.0997
O60783	MRPS14	-0.3554	0.7102
Q70Z35	PREX2	0.365	0.4905
Q9Y262	EIF3L	0.227	1.4187
O43520	ATP8B1	0.0822	0.2414
O95243	MBD4	-1.6855	0.7015
B7Z4N7	KLHL7	0.6085	1.072
P09914	IFIT1	0.6451	3.3203
Q8N442	GUF1	-0.6657	2.0922
Q15013	MAD2L1BP	0.577	4.1984
O60613	SEP15	0.2638	0.8074
P23246	SFPQ	-0.0545	0.234
Q14232	EIF2B1	0.2475	0.975
P20020	ATP2B1	0.1942	0.836
Q8IVV7	GID4	0.6384	1.938
Q15643	TRIP11	-0.0205	0.0683
P49711	CTCF	-0.0075	0.0153
P35222	CTNNB1	0.2635	0.799
Q8IWV8	UBR2	-0.2703	0.156
Q86YV9	HPS6	-0.0164	0.0377
Q86YM7	HOMER1	0.4472	2.2581
P14927	UQCRB	-0.611	1.585
Q75QN2	INTS8	0.2985	0.9054
H7BYY1	TPM1	-0.4239	2.1717
P84101	SERF2	-1.0787	1.3898
Q8N4Q1	CHCHD4	-0.6613	1.2048
Q6IA86	ELP2	-0.0964	0.2564
O60841	EIF5B	-0.1105	0.5651
Q5SVZ6	ZMYM1	-0.6786	3.2035
Q9NR56	MBNL1	0.5348	1.5048
Q96G46	DUS3L	2.226	5.3082
P04040	CAT	0.285	1.0065
Q86UU0	BCL9L	0.1493	0.5717
Q9BY32	ITPA	0.3226	1.2579
Q9NS86	LANCL2	0.2086	0.3209
Q96FC9-2	DDX11	-0.2113	0.1157
P78563	ADARB1	1.5677	3.5069
O14949	UQCRQ	0.019	0.0551
P61289	PSME3	0.0298	0.0669
Q9NZ63	C9orf78	-0.0191	0.0008
Q9UNK0	STX8	-0.5777	1.5142
Q8ND82	ZNF280C	0.4671	1.5284
Q8N4P3	HDDC3	-0.4039	0.7763
Q14114	LRP8	-0.3984	0.2792
Q9Y6M1	IGF2BP2	-0.1199	0.4402
Q6P1X5	TAF2	0.5329	1.0758
A8MT69	STRA13	0.9192	1.8883
Q9ULX3	NOB1	-0.2378	1.1004
O75688	PPM1B	0.3386	1.5194
P26232	CTNNA2	0.4181	0.5541
P10606	COX5B	-0.29	1.2847
Q9BZE1	MRPL37	-0.0883	0.1985
Q6GQQ9	OTUD7B	0.8306	1.8115
Q15398-3	DLGAP5	-0.0352	0.1303
Q9H9F9	ACTR5	0.0552	0.1068
Q6UWE0	LRSAM1	0.4411	0.9596
Q8WUH6	TMEM263	-0.2757	0.8401
Q9P0N9	TBC1D7	-0.1477	0.3668
P51948	MNAT1	0.5963	1.3684
O60476	MAN1A2	-0.292	0.5531
P55786	NPEPPS	-0.2126	1.058
Q9GZY8-2	MFF	-0.4043	0.5134
O60279	SUSD5	-0.3625	1.4267
P45985	MAP2K4	0.327	1.6796
P16219	ACADS	-0.0324	0.3482
Q96EM0	L3HYPDH	0.1463	0.2159
Q5JSZ5	PRRC2B	0.3022	1.0222
Q5EE01	CENPW	0.3552	1.5168
P48506	GCLC	0.1622	0.3196
Q2TAL8	QRICH1	0.0754	0.2619
Q9HDC9	APMAP	0.0448	0.1996
P55347	PKNOX1;PKNOX2	0.1697	0.3529
P10253	GAA	0.0126	0.1503
P52907	CAPZA1	-0.0989	0.4413
Q8WVB6	CHTF18	0.1495	0.3358
P08559	PDHA1	-0.1696	0.4625
Q9BRR6	ADPGK	-0.0486	0.1888
Q9UK59	DBR1	-0.0482	0.1241
P51571	SSR4	-0.5253	1.5326
P41227	NAA10;NAA11	-0.0703	0.2171
Q96QD9	FYTTD1	0.4946	1.4836
Q96ER3	SAAL1	-0.2875	0.6456
Q9BQF6	SENP7	0.0021	0.11
Q8WXE1	ATRIP	0.0487	0.171
Q8WWM7	ATXN2L	0.0868	0.3571
Q15154	PCM1	0.3413	1.0078
F5GY98		-0.8786	0.948
Q8TD19	NEK9	0.1439	0.3909
Q9NQC8	IFT46	0.6878	1.7119
Q9UQ35	SRRM2	-0.1138	0.3536
Q9NS23	RASSF1	0.7709	0.997
Q96KR1	ZFR	0.0375	0.1305
Q04726	TLE3	0.4	0.0614
Q14999	CUL7	0.7029	1.0956
Q13443	ADAM9	-0.3046	0.424
P43897	TSFM	-0.5858	3.3358
Q96HY6	DDRGK1	0.3771	1.726
Q3MHD2	12	-0.0844	0.1932
Q15149-9	PLEC	-0.4972	1.8497
Q9NZ56	FMN2	-0.2981	0.6071
Q9Y5Z4	HEBP2	-0.8566	1.9947
Q8NAV1	PRPF38A	-0.0361	0.0451
Q9H5X1	FAM96A	0.2841	0.3295
E9PL57	NEDD8-MDP1;NEDD8	-1.0292	1.5867
Q66K14	TBC1D9B	0.2491	0.7747
Q16775	HAGH	0.2966	0.9149
Q13523	PRPF4B	0.0654	0.1744
O15294	OGT	0.2803	1.4968
P53634	CTSC	0.6628	2.6697
P30414	NKTR	-0.2854	0.8343
P09601	HMOX1	-2.2059	3.6749
O43795	MYO1B	-0.2699	0.9619
Q969G6	RFK	-0.7457	0.8039
P14406	COX7A2	0.0739	0.0217
O00165	HAX1	0.7471	1.5873
Q99627	COPS8	-0.4431	1.8802
Q8WXE0	CASKIN2	-0.3717	1.2204
Q15003	NCAPH	-0.2823	1.1018
Q9NNX1	TUFT1	0.351	0.5887
Q9Y6A5	TACC3	-0.1677	0.6449
P15880	RPS2	0.4418	0.9587
O75157	TSC22D2	0.523	0.5622
Q8NCA5	FAM98A	-0.2661	0.5783
P62330	ARF6	0.0051	0.0245
Q14657	LAGE3	-0.2743	0.5493
O75530	EED	0.0818	0.3058
P41214	EIF2D	0.0768	0.2453
P08123	COL1A2	-0.6571	0.4735
Q9H4G0-2	EPB41L1	-0.5619	1.3425
P56181-2	NDUFV3	0.0062	0.0169
Q9H307	PNN	-0.1201	0.3389
P50213	IDH3A	-0.1838	0.5042
Q5VWZ2	LYPLAL1	-0.0653	0.107
P21980	TGM2	-1.439	4.5677
Q15847	ADIRF	-1.8215	5.9007
P35241	RDX	-0.2683	0.8497
Q96HA7	TONSL	1.4919	2.4575
Q86VN1	VPS36	0.3034	0.3609
Q7Z6M4	MTERF4	0.4461	1.305
Q5T2T1	MPP7	-0.7186	4.7159
P22090	RPS4Y1	-0.5904	1.8111
Q96S44	TP53RK	-0.0827	0.2113
Q8TCJ2	STT3B	-0.0489	0.0733
Q14192	FHL2	0.0254	0.0445
O75083	WDR1	0.398	1.7017
Q96P70	IPO9	0.176	0.6336
P61353	RPL27	0.0758	0.1212
Q96RU2-2	USP28	-0.2262	0.0297
Q99460	PSMD1	0.085	0.275
P04049	RAF1	0.4431	1.0107
Q8TEQ0	SNX29;SNX29P2	0.4484	1.781
O14618	CCS	0.4316	1.8348
Q12965	MYO1E	0.3218	1.1995
Q96RY7	IFT140	-1.3997	3.7172
Q12959	DLG1	0.5525	3.4245
P23193	TCEA1	-0.1396	0.4149
Q9BPW8	NIPSNAP1	-0.1009	0.3528
Q96Q42	ALS2	0.6721	1.2091
Q15545	TAF7	0.1236	0.1925
Q2NKX8	ERCC6L	0.1615	0.4588
Q8N2K0	ABHD12	0.37	0.4519
Q8IZ73	RPUSD2	-0.716	1.392
Q9Y2S6	TMA7	-0.4421	1.4478
O14681	EI24	0.3958	1.2334
Q9NP73-2	ALG13	0.3268	0.7471
Q6DKI1	RPL7L1	-0.2422	0.7
Q96G01	BICD1	0.1699	0.3784
Q9NP72	RAB18	0.2586	0.5359
Q9Y696	CLIC4	-0.3056	1.3362
Q9UMS6	SYNPO2	0.4978	1.7256
Q9H173	SIL1	-0.4988	1.4954
Q6P9B6	TLDC1	-0.2172	0.5649
Q6P5R6	RPL22L1	-1.328	1.8326
Q7Z5L9-2	IRF2BP2	-0.0129	0.0271
Q9UDY8	MALT1	0.0286	0.1092
O60291	MGRN1	0.6977	0.5779
Q9UNL4	ING4	-0.3343	0.1028
Q9NUL5	C19orf66	-0.0445	0.1806
Q92542	NCSTN	0.0324	0.1245
P04637	TP53	-0.3409	0.9452
O43516	WIPF1	-0.6042	0.7294
P20339	RAB5A	0.5138	0.6889
Q96FX7	TRMT61A	0.9766	1.6462
P30042	C21orf33	0.2076	0.468
Q9Y3E5	PTRH2	-0.6306	2.0694
Q8N8R7	ARL14EP	0.1251	0.4322
P53602	MVD	-0.28	0.7737
P17483	HOXB4	0.1958	0.4967
Q8NHG7	SVIP	0.0783	0.1571
O43306	ADCY6	0.3642	1.103
Q5VVM6	CCDC30	-1.5658	1.2129
Q15008	PSMD6	-0.2213	0.4306
Q9NP81	SARS2	0.0924	0.0688
P10155	TROVE2	0.2751	1.0905
Q16698	DECR1	0.1102	0.4504
P51580	TPMT	-0.1207	0.0312
Q5T6S3	PHF19	0.3152	0.6755
Q92664	GTF3A	0.6418	1.3463
Q96JN2	CCDC136	-2.795	10.4392
Q8TCE6	FAM45A	-0.3616	0.9329
Q96I15	SCLY	1.5885	2.268
O94906	PRPF6	0.1735	0.6198
Q8TAP6	CEP76	0.4934	0.9479
Q96D46	NMD3	-0.559	2.7338
P45973	CBX5	0.1789	0.5238
Q5VYK3	ECM29;KIAA0368	0.126	0.5672
Q5T280	C9orf114	-1.44	4.2921
O00233	PSMD9	0.5276	1.0336
Q16851-2	UGP2	-0.1565	0.4566
P04179	SOD2	-1.1286	3.1962
P42765	ACAA2	-0.0834	0.359
O60220	TIMM8A	-0.101	0.3558
P52565	ARHGDIA	-0.0576	0.2057
O75554	WBP4	0.6009	1.4709
Q9UH62	ARMCX3	0.0656	0.2305
O95159	ZFPL1	0.7492	1.3463
Q9UMX5	NENF	-0.1661	0.2396
Q9UBT6	POLK	0.5708	2.6877
Q6FI13	HIST2H2AA3;HIST2H2AC	-0.3218	0.8583
Q9P0P8	C6orf203	-0.1493	0.2508
Q5HYK3	COQ5	0.1249	0.4403
C9JFE4	GPS1	-0.3308	1.03
Q96HW7	INTS4	0.1545	0.562
P63146	UBE2B;UBE2A	-0.3384	1.1436
Q1ED39	KNOP1	0.0073	0.013
Q8IVH4	MMAA	-0.2758	1.0987
O95716	RAB3D;RAB3C;RAB3A	-0.5296	1.6416
P83916	CBX1	0.2132	0.5806
Q9H0U6	MRPL18	0.2401	1.1885
Q9BYD6	MRPL1	0.0259	0.0397
Q9H3Q1	CDC42EP4	-0.3173	0.9609
O95400	CD2BP2	0.3046	1.082
Q96FW1	OTUB1	0.2533	0.5852
Q9NUQ8	ABCF3	-0.2399	0.837
Q5T6V5	C9orf64	0.3968	1.6069
Q9UBC2-2	EPS15L1	0.1416	0.4596
Q92600	RQCD1	-0.939	1.8968
Q8IUR0	TRAPPC5	0.2749	0.5698
Q13263	TRIM28	0.1828	0.6681
Q96AX1	VPS33A	-0.0823	0.1412
Q5EBL8	PDZD11	0.1769	0.3615
P55209	NAP1L1	-0.0177	0.0903
Q13188	STK3	0.0136	0.0858
Q9BXY0	MAK16	-0.0734	0.1703
Q9BQE5	APOL2	0.1668	0.5003
Q13206	DDX10	0.0613	0.1697
Q8N7H5	PAF1	0.0547	0.2407
P33991	MCM4	-0.1289	0.593
Q9HAV7	GRPEL1	-0.2315	0.5987
Q9H0V9	LMAN2L	-0.0298	0.0135
Q9BRG1	VPS25	-0.0472	0.1652
P52758	HRSP12	-0.0535	0.1776
P35268	RPL22	0.1097	0.3876
O95926	SYF2	0.0398	0.1207
Q3ZCQ8	TIMM50	-0.06	0.2227
Q08AF3	SLFN5	-0.6901	3.4533
P52569	SLC7A2	0.6859	1.2325
Q9H7D7	WDR26	0.1426	0.1865
Q96E22	NUS1	0.1505	0.2918
Q92610	ZNF592	0.1563	0.5775
Q96HS1	PGAM5	0.109	0.1898
P49662	CASP4	-0.6317	1.2624
Q9H3R5	CENPH	0.1153	0.1713
Q96MW1	CCDC43	-0.138	0.266
Q5VV42	CDKAL1	-0.4529	1.0445
Q9UK99	FBXO3	0.5128	1.1461
Q709F0	ACAD11	-3.184	9.9922
Q9NUJ3	TCP11L1	-0.5029	0.755
O15145	ARPC3	0.2484	1.1635
O43583	DENR	0.1999	0.6902
Q6P4R8	NFRKB	-0.1193	0.3043
P13674	P4HA1	-0.2209	1.2674
Q712K3	UBE2R2	0.3352	0.7141
Q04917	YWHAH	-0.1221	0.3505
O95573	ACSL3	-0.1404	0.3712
Q9NRX4	PHPT1	0.6016	2.4412
B4E107	ATE1	0.5489	2.1991
Q7L266	ASRGL1	0.1688	0.0215
Q15691	MAPRE1	0.0015	0.0138
Q8NB37	PDDC1	0.194	0.4141
Q06190	PPP2R3A	0.0463	0.0496
Q92901	RPL3L	-1.3	0.8253
K7EJH0	SPC24	-1.5042	1.8674
Q7Z2E3	APTX	-0.2256	0.4959
P11169	SLC2A3;SLC2A14	0.5388	0.1977
Q9NVU0	POLR3E	0.4041	0.2509
P11172	UMPS	-0.0127	0.0561
Q9Y5Q9	GTF3C3	0.2157	0.5437
O14936	CASK	0.1987	0.5976
Q9H0K6	PUS7L	-0.2406	0.8223
Q9BRD0	BUD13	-0.1783	0.3322
P30566	ADSL	0.1063	0.2203
Q9UKJ3	GPATCH8	-0.1113	0.3753
Q5M9N0	CCDC158	-0.8458	2.5395
Q9BWE0	REPIN1	0.3658	0.7759
E5RI60	ADAMTS1	-2.1404	4.6617
Q8WUY3	PRUNE2	0.6411	1.36
Q96E52	OMA1	0.8037	3.7275
P61970	NUTF2	0.4751	1.5028
Q8WV22	NSMCE1	0.4825	1.5298
Q9NZ45	CISD1	0.0123	0.0547
Q8TCS8	PNPT1	0.135	0.5245
Q9H6R7	C2orf44	0.4761	1.1306
P56556	NDUFA6	-0.2533	0.3037
Q6QNY1	BLOC1S2	-0.0804	0.2201
Q9NUD5	ZCCHC3	1.0184	2.3619
Q9Y421	FAM32A	-0.3536	1.3419
Q14157-1	UBAP2L	-0.0659	0.1903
Q04446	GBE1	0.0979	0.2746
Q7L0Y3	TRMT10C	-0.4777	2.7986
Q96IJ6	GMPPA	-0.119	0.3985
A8MXP9	MATR3	0.0828	0.2591
Q93052	LPP	0.2361	0.649
P07237	P4HB	-0.0556	0.2102
Q9UQ88	CDK11A	-0.3302	0.8274
P51692	STAT5B	0.0221	0.0731
O60281	ZNF292	0.8438	1.4959
Q8TB96	ITFG1	0.3415	0.9062
P09211	GSTP1	0.1714	0.4807
Q14686	NCOA6	0.2327	0.6966
Q9UNF1	MAGED2	-0.2092	0.929
P40926	MDH2	0.2398	0.9768
Q6Q0C0	TRAF7	0.0353	0.1032
Q9NU22	MDN1	0.3019	1.7519
Q02539	HIST1H1A	-0.449	0.5183
O94817	ATG12	0.1784	0.3739
Q14137	1	0.0023	0.003
P24752	ACAT1	0.2012	0.9011
Q8TCU6	PREX1	0.0714	0.2828
Q9BVM2	DPCD	-0.2921	1.2801
P18827	SDC1	-1.0307	1.0373
Q8N5A5	ZGPAT	0.8512	1.698
Q15058	KIF14	0.1974	0.5247
P13987	CD59	-0.3532	1.2159
Q16342	PDCD2	0.0507	0.0669
P29401	TKT	-0.1595	0.7059
P49917	LIG4	0.3214	0.6229
O15118	NPC1	0.1184	0.3424
Q8TEU7	RAPGEF6	0.8123	2.3657
Q8TCZ2	CD99L2	-0.4815	0.4432
Q96NC0	ZMAT2	-0.1665	0.5346
P11142	HSPA8	0.085	0.3758
Q93063	EXT2	-0.3444	0.9995
Q9BRK3	MXRA8	-1.2706	2.019
Q96EY5	MVB12A	-0.2965	0.682
Q01954	BNC1;BNC2	-0.2524	0.4492
O15047	SETD1A	0.5235	1.3112
O60711	LPXN	0.7312	0.7115
G5E9Z2	CLPTM1L	-0.0067	0.3285
Q9BRK5	SDF4	-0.4807	1.3091
Q8IYS1	PM20D2	0.6661	0.8388
P06241	FYN	-0.5637	0.1888
Q53EP0	FNDC3B	0.0491	0.0953
P07996	THBS1	0.4009	0.396
Q99538	LGMN	-0.2374	0.2378
Q14CX7	NAA25	0.0835	0.2269
Q9BRQ8	AIFM2	-0.9364	4.8973
Q9NX58	LYAR	-0.4204	0.8828
Q4LE39	ARID4B	0.1829	0.6336
Q86SF2	GALNT7	0.3404	0.4226
P55210	CASP7	-0.1872	0.0292
Q9Y2Z0-2	SUGT1	-0.263	1.0346
F8VPJ2	KIF13B	0.2061	0.6571
Q9P0S9	TMEM14C	-0.022	0.1755
Q86WR0	CCDC25	0.2105	0.9895
Q96LZ7	RMDN2	-0.8127	2.0254
Q99943	AGPAT1	0.2477	1.099
O95139	NDUFB6	-0.2973	0.5772
Q8N584	TTC39C	-0.3247	0.5501
P78537	BLOC1S1	-0.1536	0.2398
P32780	GTF2H1	-0.1388	0.39
Q8IWZ3	ANKHD1	0.2946	1.2382
Q9ULV4	CORO1C	0.0052	0.0082
O14727	APAF1	0.0495	0.1017
Q9UL63	MKLN1	0.229	0.7206
P19838	NFKB1	0.1861	0.6138
Q562F6	SGOL2	0.6238	2.9008
P11182	DBT	-0.0111	0.0402
P82979	SARNP	-0.4478	1.2448
P43490	NAMPT	-0.0221	0.0985
P62318	SNRPD3	-0.2315	0.3029
O95782	AP2A1	0.0025	0.0094
Q8N128	FAM177A1	0.1197	0.2488
P23458	JAK1	-0.5027	1.765
P23921	RRM1	0.2953	1.1792
Q9H7E2-3	TDRD3	0.8418	1.1475
Q9BRJ7	NUDT16L1	0.7244	2.864
E7ENY0	ADD1	0.3194	1.072
P46926	GNPDA1	0.0417	0.1818
Q4G176	ACSF3	0.4797	2.0302
P11117	ACP2	-0.1547	0.2526
Q9BSJ5	C17orf80	0.0104	0.1383
O95218	ZRANB2	-0.8936	1.7121
Q7Z7F7	MRPL55	-0.0307	0.1137
P28331	NDUFS1	0.0206	0.0555
Q96F85	CNRIP1	0.3585	1.5362
O00264	PGRMC1	-0.637	1.879
Q96B01	RAD51AP1	-0.5194	1.4493
Q92878	RAD50	-0.0033	0.0539
P45877	PPIC	1.0883	3.285
Q5H8A4	PIGG	-0.2049	0.5854
P21953	BCKDHB	0.3355	0.5868
P22392-2	NME2;NME1-NME2;NME1	-0.1995	0.7456
P60866	RPS20	-0.4064	1.1015
O75947	ATP5H	0.0393	0.1486
P61978-2	HNRNPK	-0.1226	0.4194
Q8IWB9	TEX2	0.2669	0.388
Q9NQT4	EXOSC5	0.0526	0.0388
Q8TEM1	NUP210	-1.6558	1.201
Q96KG9	SCYL1	-0.098	0.3547
O95433	AHSA1	0.192	0.5352
P11310	ACADM	0.1603	0.5709
P29375	KDM5A	0.6507	0.5854
P82650	MRPS22	-0.3692	1.8972
Q9Y5U9	IER3IP1	-0.6745	1.7199
Q8N2C7	UNC80	-2.4521	2.8997
Q15067-2	ACOX1	-2.5983	8.3735
Q9C0D3	ZYG11B	0.0345	0.0632
P16070	CD44	0.2805	0.557
P12814	ACTN1	0.3112	1.8646
P54136	RARS	0.0386	0.1361
P04844	RPN2	0.0745	0.2164
Q9P0J6	MRPL36	0.5705	1.9766
Q9Y6G5	COMMD10	0.0411	0.1715
Q8NBF2	NHLRC2	0.516	2.7267
B5MCW2	RPL3	0.2329	1.2471
Q9Y2B0	CNPY2	-0.8841	1.6003
O75882	ATRN	0.2206	0.5724
Q6I9Y2	THOC7	-0.6284	1.1287
Q56NI9	ESCO2	-0.0732	0.347
Q9Y3C1	NOP16	0.0011	0.0434
Q96BH1	RNF25	-0.4348	1.3877
Q99426	TBCB	-0.1659	0.3983
Q15056	EIF4H	0.0405	0.0894
Q8TF66	LRRC15	-5.2756	10.8401
Q9HBK9	AS3MT	2.2605	1.626
P15822	HIVEP1	-0.9383	1.2647
Q6AI08	HEATR6	0.0431	0.0989
Q9NV64	TMEM39A	-0.0038	0.0636
Q8N5S9	CAMKK1	-0.047	0.0951
Q9Y496	KIF3A	-0.1039	0.2786
P0C0S5	H2AFZ;H2AFV	-0.0162	0.0035
P42694	HELZ	-0.0899	0.1874
P15104	GLUL	-0.7993	1.498
Q9Y2Z0	SUGT1	0.2761	0.7551
Q8TEA7	TBCK	-0.826	1.212
Q8TD16	BICD2	0.1072	0.6168
Q7L592	NDUFAF7	0.7342	2.6482
P31930	UQCRC1	0.0844	0.2688
Q92783	STAM	0.5374	2.2551
Q96GM5	SMARCD1	0.3621	1.3591
P13716	ALAD	0.3644	0.7566
Q9NYL9	TMOD3	-0.3391	0.8556
Q9BQI6	ANKRD32	-0.8162	1.9414
Q9P2Q2	FRMD4A	1.679	3.7285
O00400	SLC33A1	0.1957	0.4597
P22059	OSBP	0.2562	1.0544
Q9NW68	BSDC1	-0.1356	0.0429
P33316	DUT	-0.9079	2.5912
O15371	EIF3D	0.3498	0.9738
Q6P0Q8	MAST2	0.726	1.518
Q86UE4	MTDH	-0.4188	1.2513
Q9NQ29	LUC7L	-0.0572	0.2068
P53985	SLC16A1	-1.0478	1.5475
O95149	SNUPN	-0.1291	0.0742
Q9H8M2	BRD9	0.7796	1.9909
O75691	UTP20	0.1768	0.7821
Q9NZ43	USE1	0.1292	0.2846
Q96ES7	CCDC101	-0.151	0.6906
Q7L3B6	CDC37L1	-0.5727	0.4819
Q5T7M9	FAM69A	0.2356	0.2792
Q13042	CDC16	0.0265	0.1095
O75746	SLC25A12	0.3212	0.7179
Q9NW82	WDR70	-0.1382	0.3473
Q9Y4Z0	4	0.4435	2.5121
P09661	SNRPA1	-0.1773	0.5202
Q96Q05	TRAPPC9	0.8414	4.1688
Q99504	EYA3	0.1419	0.1743
P18850	ATF6	-0.383	0.416
Q6P1N0	CC2D1A	0.0909	0.218
Q9GZM5	YIPF3	0.3463	0.9039
Q8N6G5	CSGALNACT2	0.437	1.1004
Q8IZD4	DCP1B	0.3059	0.8038
Q8IZA0	KIAA0319L	-0.3056	0.6705
P30084	ECHS1	-0.0167	0.0773
Q02241	KIF23	-0.1001	0.4219
Q9Y241	HIGD1A	0.1232	0.2667
Q13619	CUL4A	0.0637	0.1918
Q13547	HDAC1	-1.1928	1.6281
Q8TB72-3	PUM2	0.1233	0.4117
Q5SXM2	SNAPC4	0.1157	0.3834
P23786	CPT2	0.419	1.6048
Q68DA7-3	FMN1	0.5582	1.5381
Q9H582	ZNF644	0.8132	2.0223
O14561	NDUFAB1	0.7598	1.8269
E9PB61	ALYREF	-0.3431	1.6167
Q5T5X7	BEND3	-0.1071	0.1468
Q12884	FAP	-0.0737	0.2073
O95299	NDUFA10	-0.1468	0.603
Q9UJ70	NAGK	0.1645	0.484
Q14108	SCARB2	-0.1005	0.3373
Q99685	MGLL	-0.312	1.7296
O75884	RBBP9	0.4219	0.7547
Q7Z6B0	CCDC91	-1.0115	4.0509
Q92922	SMARCC1	0.2854	1.1479
P07814	EPRS	0.1537	0.5995
Q8WVC0	LEO1	0.1815	0.4586
Q9NX70	MED29	0.3427	0.805
Q6P1L8	MRPL14	-0.1499	0.2315
Q9ULW5	RAB26	-1.0824	5.1739
Q9BXS5	AP1M1	-0.0873	0.2234
B2RCS5	ACTN2	0.3982	0.9577
Q12774	ARHGEF5	0.194	0.3533
P62899	RPL31	-0.2505	0.4404
P62310	3	-0.2428	1.067
Q14249	ENDOG	0.2294	0.1
Q8N5U6	RNF10	0.5488	1.135
O14925	TIMM23;TIMM23B	0.3528	0.6359
Q9H5Q4	TFB2M	-0.1911	0.729
Q86WX3	RPS19BP1	-0.2853	0.4002
Q96GM8	TOE1	0.3793	0.7299
O43264	ZW10	0.289	1.2943
Q9Y244	POMP	-0.2021	0.4215
Q5VT06	CEP350	-0.3815	0.5621
Q9UKV8	AGO2	0.3699	0.9445
Q05682-4	CALD1	-0.2011	0.3826
O43709	WBSCR22	0.5022	2.0822
Q02218	OGDH	0.164	0.7247
Q9UPY3	DICER1	-0.4413	1.0869
O96028	WHSC1	0.3174	1.3197
Q9UJK0	TSR3	0.3412	0.7206
P68104	EEF1A1;EEF1A1P5	0.0777	0.2801
P35080-2	PFN2	-0.2994	0.9664
P37837	TALDO1	1.3217	5.2204
P18077	RPL35A	0.0169	0.0537
Q53FT3	C11orf73	0.0326	0.1217
Q96IP4	FAM46A	-0.2344	0.7013
P35318	ADM	0.1323	0.1776
O14730	RIOK3	1.1226	4.6496
O14965	AURKA	-0.3174	0.5157
Q92963	RIT1	0.3718	2.2444
Q6PK04	CCDC137	0.0804	0.1139
Q9NRA8	EIF4ENIF1	0.0906	0.3148
Q69YN2	CWF19L1	0.0775	0.2847
P62333	PSMC6	0.1196	0.4746
Q01664	TFAP4	-0.1994	0.2331
O15287	FANCG	1.094	2.139
P56377	AP1S2	-0.3489	1.166
Q9Y3C4	TPRKB	0.0853	0.0993
Q9H7E9	C8orf33	0.3888	0.7245
Q9Y2Z2	MTO1	-0.1374	0.072
Q12765	SCRN1	0.7184	1.0859
Q9NX40	OCIAD1	-0.5028	2.0593
Q9P032	NDUFAF4	0.3084	0.5657
Q9Y6R0	NUMBL	-0.1475	0.5825
Q7Z7K0	CMC1	-0.4555	0.7848
Q96SB3	PPP1R9B	0.0573	0.0209
P48556	PSMD8	0.0712	0.2107
Q9NXS2	QPCTL	0.4851	1.8601
Q14258	TRIM25	-0.0102	0.017
P23919	DTYMK	-0.2979	1.0451
O95684	FGFR1OP	-0.4037	1.0339
Q99811	PRRX2	-0.6027	1.0969
Q13564	NAE1	0.1912	0.7831
P50479	PDLIM4	0.1086	0.2809
Q13488	TCIRG1	0.5394	0.7116
Q9NPH0	ACP6	0.2593	0.5596
P42892	ECE1	0.5147	2.8646
E9PDL9	SLC4A7	0.5138	1.1624
O75694	NUP155	0.1844	0.4034
P26440	IVD	0.1567	0.5931
Q9HAV4	XPO5	0.2894	0.8808
P46976-2	GYG1	0.4074	2.039
P55795	HNRNPH2	-0.5324	1.0898
Q9Y6D9	MAD1L1	-0.0244	0.0935
Q13418	ILK	0.2432	0.8461
P29992	GNA11	0.0945	0.2278
A6NHL2	TUBAL3	0.6794	1.2523
B3KVK7	MARS	-4.2652	12.4651
Q8IV20	LACC1	0.397	0.8887
Q9Y3E1	HDGFRP3	0.0169	0.0475
Q8NFQ8	TOR1AIP2	-0.395	1.0398
Q06124	PTPN11	0.2248	0.8521
Q14527	HLTF	-0.6751	1.7853
P01116	KRAS	-0.2629	0.7291
Q8IV48	ERI1	-0.1616	0.405
C9J2U4	TAMM41	1.2105	1.8778
P23434	GCSH	-0.6313	1.044
Q86UU1-2	PHLDB1	-0.113	0.1664
Q8NCN4	RNF169	0.0965	0.1654
Q13616	CUL1	0.0907	0.3254
P27658	COL8A1	-0.059	0.2943
A0PJW6	TMEM223	-0.3379	0.4744
Q9P246	STIM2	0.7697	1.7843
Q9HA65	TBC1D17	-0.3333	1.3351
P00533	EGFR	-0.1861	0.8891
Q9H936	SLC25A22	-0.375	0.2657
Q13620-1	CUL4B	-0.0965	0.2546
O95057	DIRAS1	-0.6375	1.2674
Q9Y2K7	KDM2A	0.1846	0.5692
Q9Y617	PSAT1	-0.2461	1.2561
Q5T8P6	RBM26	0.3558	2.1307
Q9BYI3	FAM126A	0.2025	0.8606
P56537	EIF6	-0.2353	0.5083
Q99547	MPHOSPH6	-0.0348	0.1479
Q96PV6	LENG8	-1.5395	2.1317
P34741	SDC2	0.6535	1.1985
Q6P2C8	MED27	-0.0329	0.0964
P42785	PRCP	-0.3064	0.8313
Q9BQS8	FYCO1	-0.2243	1.0056
Q658P3	STEAP3	0.6182	2.0932
P33121	ACSL1	0.2109	0.7103
Q9BXW9	FANCD2	-0.0363	0.1225
Q9HC21	SLC25A19	-0.2283	0.6233
O14715	RGPD8;RGPD5	0.5592	1.4152
O94763	URI1	0.1819	0.6903
Q96JC9	EAF1	0.2663	0.8104
F5H744	C12orf4	-0.3814	2.1764
Q9H0Z9	RBM38;RBM24	2.2687	5.5713
Q08170	SRSF4	0.0107	0.0614
Q86WB0	ZC3HC1	-0.0066	0.1073
Q9P260	KIAA1468	0.2092	0.7479
Q9H7L9	SUDS3	-0.5513	1.2576
Q16513	PKN2	-0.0996	0.3023
O75396	SEC22B	-0.2719	0.6566
P16989-2	YBX3	0.1689	0.8386
Q96D71	REPS1	0.1802	0.6174
Q92597	NDRG1	-0.7695	2.0299
Q58FF6	HSP90AB4P	0.1413	0.3675
Q9P0I2	EMC3	0.2203	0.5232
Q16610	ECM1	-0.6668	1.1633
O14672	ADAM10	-0.2878	0.6722
Q96BR6	ZNF669	-0.0255	0.2387
Q14139	UBE4A	0.0752	0.1554
Q96EN8	MOCOS	-0.8957	2.1794
Q9Y6G3	MRPL42	-0.0654	0.1603
Q9H900	ZWILCH	0.2364	0.7934
Q4G148	GXYLT1	0.4444	0.8525
O75792	RNASEH2A	-0.3415	1.8484
Q9H3K6	BOLA2	-0.0817	0.1486
Q9H6D7	HAUS4	0.0905	0.0564
Q9C0B1	FTO	0.3565	1.4396
O14950	MYL12B	0.3211	1.9659
Q9UHE8	STEAP1	0.2194	0.0257
Q16774	GUK1	-0.2171	0.51
Q5T1V6	DDX59	1.0564	0.4518
P62877	RBX1	-0.7183	1.3564
P05091	ALDH2	-0.3881	0.8268
Q8NAP3	ZBTB38	0.4894	1.0598
Q5MNZ6	WDR45B	0.2583	0.5041
Q07954	LRP1	-0.356	1.2517
P59998	ARPC4;ARPC4-TTLL3	-0.0151	0.0148
Q9NYV4	CDK12	-0.0065	0.0353
P17931	LGALS3	0.0684	0.2343
Q13505	MTX1	0.0821	0.1365
Q96K37	SLC35E1	0.0038	0.0357
Q96EK9	KTI12	-0.0228	0.1686
O94919	ENDOD1	0.8223	2.8767
P30049	ATP5D	0.0551	0.2394
Q53ET0	CRTC2	-0.1898	0.031
Q92599	SEPT8	0.2619	0.5195
P59768	GNG2	-1.058	2.267
P17081	RHOQ	0.1058	0.2623
Q9NYB0	TERF2IP	-0.2798	0.715
Q13868	EXOSC2	0.3546	0.6051
P62306	SNRPF	0.5711	0.9622
Q8N5M9	JAGN1	0.1607	0.1241
Q9P013	CWC15	-0.2086	0.5513
Q587I9	SFT2D3	0.2814	0.8927
Q15185	PTGES3	0.1564	0.6077
Q6P2H3	CEP85	0.4333	1.3692
E7EVQ5	CTHRC1	-0.726	4.196
P15336	ATF2	0.593	0.8099
Q86YC2	PALB2	0.1038	0.5445
Q9BVW5	TIPIN	0.4844	2.4804
Q15555	MAPRE2	0.2251	0.8597
P55036	PSMD4	-0.0241	0.1167
O95361	TRIM16	0.1509	0.3714
P30260	CDC27	0.0352	0.0752
P47224	RABIF	0.2584	1.1411
Q13795	ARFRP1	0.4781	1.6638
O75150	RNF40	-0.2404	0.9221
P53675	CLTCL1	-0.2598	0.2091
Q5PSV4	BRMS1L	0.1968	0.5077
P18887	XRCC1	0.0762	0.1259
Q9UGY1	NOL12	0.7575	2.289
P42695	NCAPD3	0.4238	1.073
Q14160	SCRIB	0.1341	0.3629
Q93034	CUL5	0.2393	0.8126
Q02040	AKAP17A	-0.1171	0.3635
Q8IWA4	MFN1	0.4276	1.2858
Q9NXF1	TEX10	0.0261	0.0955
Q9NVH0	EXD2	0.377	1.1286
P31483-2	TIA1	0.9842	3.9398
Q99447	PCYT2	-0.9841	1.9459
Q05639	EEF1A2	1.6163	1.7301
P10301	RRAS	-0.6891	3.3607
Q13813	SPTAN1	0.091	0.3732
Q9UJW0	DCTN4	0.4559	2.4068
P61225	RAP2B	-0.0233	0.0192
Q969E4	TCEAL3	-0.8605	1.4349
Q9UL54-2	TAOK2	-0.0482	0.1192
Q96P11	NSUN5	0.1295	0.3078
Q01081	U2AF1;U2AF1L4	-0.1403	0.1558
O75475	PSIP1	0.0673	0.2134
Q86UK7	ZNF598	0.7205	1.1685
O60784	TOM1	-0.7469	2.0357
P62328	TMSB4X	-0.8822	2.3513
O75170	PPP6R2	0.0793	0.1242
Q14697	GANAB	-0.2562	0.8396
O60244	MED14	-0.5968	1.8671
Q5SVK8	DNMBP	0.3082	0.9767
O75352	MPDU1	0.6302	1.7219
Q92990	GLMN	0.2224	1.1185
P63010	AP2B1	0.0851	0.1984
Q9Y6M4	CSNK1G3;CSNK1G2	0.3743	1.1208
Q13242	SRSF9	-0.1668	0.4363
Q96P48	ARAP1	0.4589	3.207
Q07889	1	-0.1799	0.5901
Q9Y3C0	CCDC53	-0.0464	0.0333
Q9UK76	HN1	-0.4063	0.7588
Q9H9A5	CNOT10	0.4094	0.8253
Q9NXH9	TRMT1	0.8522	1.4411
Q96DX7	TRIM44	0.0467	0.1268
Q13617	CUL2	0.1689	0.4362
O14976	GAK	0.3069	2.267
Q9Y333	2	-0.0449	0.149
P16615	ATP2A2	0.1346	0.4847
Q5SNT2	TMEM201	0.8724	3.0097
O60664	PLIN3	0.0056	0.0145
P04792	HSPB1	-0.0415	0.1633
O14662	STX16;STX16-NPEPL1	-0.5563	0.628
Q9NP61	ARFGAP3	-0.1174	0.3188
P06733	ENO1	0	0
P46199	MTIF2	0.263	0.6344
Q7L2Z9	CENPQ	-2.0076	4.9901
Q15172	PPP2R5A	0.2324	0.1977
Q5XPI4	RNF123	0.8922	1.7752
Q13573	SNW1	-0.1951	0.8331
Q96H35	RBM18	0.2715	1.0466
Q8WWX9	SELM	1.0991	2.0032
Q96D53	ADCK4	0.0552	0.0291
O60547	GMDS	-0.056	0.1156
Q7Z6J0	SH3RF1	0.8221	2.1873
Q9H6V9	C2orf43;LDAH;FLJ21820	0.1446	0.4156
Q32P41	TRMT5	-0.0684	0.2024
Q9NZI7	UBP1	0.4924	0.8058
Q14689	DIP2A	0.0295	0.0631
Q7L311	ARMCX2	-0.2051	0.7182
P09619	PDGFRB	0.8162	4.7197
P33527	ABCC1	0.5558	1.6198
Q9NXR7	BRE	-0.2996	0.5578
Q8IVP5	FUNDC1	-0.0417	0.1239
Q7Z6B7	SRGAP1	-0.0964	0.3961
Q9Y508	RNF114	0.5213	1.5113
E9PM46	USP47	0.0636	0.1301
O75976	CPD	0.1224	0.399
O14979-3	HNRNPDL	0.1672	0.6839
P54886	ALDH18A1	0.0928	0.2696
Q13428	TCOF1	0.3569	1.2389
Q13158	FADD	0.1458	0.5006
Q5JSH3	WDR44	0.1255	0.3375
P55196	MLLT4	-0.0447	0.1361
Q14118	DAG1	0.0226	0.05
Q8NDV7	TNRC6A	0.1584	0.366
Q7L7V1	DHX32	0.3718	1.3312
Q9NUI1	DECR2	-0.6085	0.8918
Q96DV4	MRPL38	-0.1519	0.4843
Q9P287	BCCIP	0.0772	0.2425
P62308	SNRPG;SNRPGP15	0.6643	3.5676
O75608	LYPLA1	0.1163	0.2988
P49721	PSMB2	0.0302	0.2091
Q9NQC3	RTN4	0.0651	0.1731
Q14517	FAT1	0.3822	0.6375
Q9BVQ7	SPATA5L1	0.245	0.8943
Q5FBB7	SGOL1	-0.2138	0.1543
Q13601	KRR1	0.3159	1.1336
Q6NZI2	PTRF	-0.3952	1.804
Q9BXJ9-4	NAA15	0.1673	1.0672
Q13164	MAPK7	0.0743	0.2244
P51608-2	MECP2	0.1139	0.4219
Q9BQ67	GRWD1	-0.1672	0.5096
Q9H4G4	GLIPR2	-0.7145	1.7891
P68363	TUBA1B	-0.0662	0.273
P48047	ATP5O	-0.1018	0.2535
P41223	BUD31	0.1977	0.7017
O15530	PDPK1;PDPK2P	0.4813	2.3979
P56270-2	MAZ	0.5683	0.8459
P07737	PFN1	0.1427	0.5413
O75330	HMMR	-0.2462	1.1262
Q14149	MORC3	0.6494	2.6759
Q96EQ0	SGTB	0.2242	0.767
P16278	GLB1	0.3697	1.3289
Q9H5N1	RABEP2	0.2624	0.8814
Q9HAF1	MEAF6	-0.4609	0.9652
Q5W0B1	RNF219	0.182	0.5017
P36551	CPOX	0.2447	0.6345
C9J406	IMMT	-0.102	0.0709
Q13162	PRDX4	-0.0506	0.1283
Q9Y3D2	MSRB2	0.4725	1.4164
Q9NT62	ATG3	-0.0105	0.0493
P25098	ADRBK1	0.2758	1.0469
P11055	MYH3	-0.2517	0.6145
Q7L2E3-2	DHX30	0.2958	1.0439
Q96HE7	ERO1L	0.1978	0.5191
Q9H0W9	C11orf54	1.272	2.5351
Q96DZ1	ERLEC1	-0.2046	0.987
Q5JPH6	EARS2	0.7527	0.7614
Q92804	TAF15	-0.0476	0.0917
Q96T60	PNKP	0.2558	0.8605
Q16637	SMN1;SMN2	0.1927	0.3616
P21281	ATP6V1B2	-0.1417	0.3968
P11233	RALA	-0.0637	0.1838
P05362	ICAM1	-0.8849	4.4244
P10909	CLU	-1.0712	1.2324
Q14BN4	SLMAP	-0.0321	0.0117
Q9BSV6	TSEN34	0.1495	0.078
P53396	ACLY	-0.0006	0.019
P43487	RANBP1	-0.4657	0.9959
Q8TEL6	TRPC4AP	0.3071	0.7606
Q14161	GIT2	0.2048	0.3661
O15400	STX7	-0.4604	0.535
P62072	TIMM10	-0.0385	0.1137
Q6PIU2	NCEH1	-0.0046	0.037
E9PC69	MARK2	0.3274	1.5482
Q9NPA3	MID1IP1	-0.3682	1.116
Q9H0S4	DDX47	-0.1332	0.3636
Q5EBL4	RILPL1	0.7697	2.9295
Q8NAF0	ZNF579	-0.3507	0.7668
Q16881	TXNRD1	0.1402	0.7255
Q53HC9	TSSC1	-1.1638	1.498
Q5JTV8	TOR1AIP1	0.1783	0.5447
Q8N573	OXR1	0.0196	0.0884
Q8N2M8	CLASRP	-0.1171	0.1806
Q9H6E5	TUT1	0.6414	1.6891
Q96P16	RPRD1A	-0.1263	0.3641
P26447	S100A4	-0.9661	3.8338
Q9NQ55	PPAN	0.327	1.2059
Q9NRR5	UBQLN4	0.996	2.219
Q53EL6	PDCD4	-0.5099	2.7553
P57772	EEFSEC	0.3045	1.0445
Q7Z6J9	TSEN54	-0.2602	0.2697
Q567U6	CCDC93	0.0618	0.1966
O15318	POLR3G	0.0838	0.2601
Q7Z4H8	KDELC2	1.074	5.5185
Q96PK6	RBM14	-0.2395	0.3217
Q9C0F1	CEP44	0.0137	0.0874
Q9NWX5	ASB6	0.0978	0.2231
O95340	PAPSS2	0.4272	2.6082
P29692-2	EEF1D	0.4684	2.4579
Q96T51	RUFY1	0.0106	0.0011
Q6P1L5	FAM117B	0.1688	0.4734
Q01082	SPTBN1	0.0318	0.1494
P30492	HLA-B	0.1518	0.0462
Q6PML9	SLC30A9	-0.807	0.8233
Q9H2Y7	ZNF106	-0.572	1.0626
P17612	PRKACA;KIN27	0.4731	2.691
Q96T58	SPEN	-0.0829	0.1236
Q96EB1	ELP4	-0.098	0.2585
P14324	FDPS	-0.3682	1.0941
Q969F9	HPS3	-0.493	1.8184
Q7L5N7	LPCAT2	-0.9003	3.3576
P04114	APOB	0.0057	0.0136
Q8WW22	DNAJA4	0.915	0.561
Q13123	IK	-0.2357	0.8139
Q86VX2	COMMD7	0.4034	1.7361
Q9UM13	ANAPC10	0.4099	1.3272
O94952	FBXO21	0.3023	0.8954
Q08AM6	VAC14	0.2424	0.8148
Q16695	HIST3H3	0.9262	1.1166
Q9BZL4	PPP1R12C	1.0412	2.185
P30876	POLR2B	-0.058	0.2269
P14373	TRIM27	-0.052	0.1608
P32321	DCTD	0.343	1.2516
A6NIH7	UNC119B	0.8401	1.9109
Q13243	SRSF5	-0.1172	0.2319
Q9Y247	FAM50B	0.0496	0.0777
P49674	CSNK1E	-0.2175	0.1427
Q9UJ83	HACL1	-1.2963	5.0864
Q13303	KCNAB2	-0.0949	0.2189
Q13884	SNTB1	-0.0448	0.1083
Q14966	ZNF638	-0.0089	0.0343
Q9H2D6-5	TRIOBP	0.3552	1.7299
P98175	RBM10	0.0412	0.0978
Q14019	COTL1	-0.2942	1.469
Q5T6J7	IDNK	-0.245	0.8038
P54819	AK2	0.0583	0.1875
P11940	PABPC1	-0.0263	0.102
Q15126	PMVK	-0.0611	0.2019
Q96C01	FAM136A	0.2307	0.3027
Q9H8G2	CAAP1	0.1513	0.365
Q9NRC1	ST7	0.2031	0.2851
O15212	PFDN6	0.2933	1.1056
Q99549	MPHOSPH8	-0.3207	0.6769
Q9NV66	TYW1	-0.0251	0.0181
Q9Y5A9	YTHDF2	0.1714	0.5587
P38398	BRCA1	-0.4493	1.7972
Q14444	CAPRIN1	-0.1467	0.7967
P31274	HOXC9;HOXB9;HOXD9	-1.1394	1.8566
Q99959	PKP2	0.3622	0.9548
Q6ZS17	FAM65A	0.335	0.3493
Q9Y2D4	EXOC6B	0.5633	1.4594
Q9H2H8	PPIL3	-0.5696	3.0373
Q15771	RAB30	0.2709	0.9127
Q9Y6A9	SPCS1	-0.067	0.1992
[truncated: 4,329 more rows]
