# Supplementary material for: Quantitative Proteomics and Differential Protein Abundance Analysis after the Depletion of PEX3 from Human Cells Identifies Additional Aspects of Protein Targeting to the ER
Source: Int J Mol Sci. 2021 Dec 1;22(23):13028. doi: 10.3390/ijms222313028 (PMC8658024; doi:10.3390/ijms222313028)
Supplement: Supplementary file 1 [file ijms-22-13028-s001.zip › Table S4_pex_3_Zellweger_full_lo.xlsx]

## Sheet: Sheet 1
Accession	Gene	Full protein name	log2 fold change	Subcellular location	SS or TMH	Glycosylation sites	SP or TMH seq.
Q5T8D3-3	ACBD5	Acyl-CoA-binding domain-containing protein 5	-5.87089	Peroxisome membrane	TMH	0	GVLTFAIIWPFIAQWLVYLYY
Q5KU26	COLEC12	Collectin-12	-5.77051	Membrane	TMH	4	FSIILLYILCALLTITVAILG
A4D1P6	WDR91	WD repeat-containing protein 91	-5.57262			0
Q9H254	SPTBN4	Spectrin beta chain, non-erythrocytic 4	-5.56542	Cytoskeleton, Cell cortex, Cytoplasm		0
Q8TF66	LRRC15	Leucine-rich repeat-containing protein 15	-5.27558	Membrane	SP	2	MPLKHYLLLLVGCQAWGAGLA
Q92526	CCT6B	T-complex protein 1 subunit zeta-2	-4.98112	Cytoplasm		0
P56589	PEX3	Peroxisomal biogenesis factor 3	-4.5943	Peroxisome membrane	TMH	0	CIFLGTVLGGVYILGKYGQKK
B3KVK7	MARS	Methionine--tRNA ligase, cytoplasmic	-4.26515	Cytoplasm		0
O76094-2	SRP72	Signal recognition particle subunit SRP72	-4.14167	Endoplasmic reticulum, Cytoplasm		0
Q9Y446	PKP3	Plakophilin-3	-4.10451	Cell junction, Desmosome, Nucleus		0
P52815	MRPL12	39S ribosomal protein L12, mitochondrial	-3.63606	Mitochondrion		0
P47895	ALDH1A3	Aldehyde dehydrogenase family 1 member A3	-3.56988	Cytoplasm		0
H0Y4R4	TOR1AIP1		-3.51912
P02452	COL1A1	Collagen alpha-1(I) chain	-3.4459	Secreted, Extracellular space, Extracellular matrix	SP	3	MFSFVDLRLLLLLAATALLTHG
Q9HCD5	NCOA5	Nuclear receptor coactivator 5	-3.25398	Nucleus		0
Q16890	TPD52L1	Tumor protein D53	-3.25107			0
O00116	AGPS	Alkyldihydroxyacetonephosphate synthase, peroxisomal	-3.24853	Peroxisome membrane		0
Q9Y2T3-3	GDA	Guanine deaminase	-3.22935			0
Q709F0	ACAD11	Acyl-CoA dehydrogenase family member 11	-3.18399	Peroxisome, Mitochondrion		0
O43752	STX6	Syntaxin-6	-2.8773	Golgi apparatus membrane	TMH	0	WCAIAILFAVLLVVLILFLVL
Q96JN2	CCDC136	Coiled-coil domain-containing protein 136	-2.79497	Acrosome membrane, Secretory vesicle, Cytoplasmic vesicle	TMH	0	IFSLPLVGLVVISALLWCWWA
Q15833	STXBP2	Syntaxin-binding protein 2	-2.77865			0
Q86WA8	LONP2	Lon protease homolog 2, peroxisomal	-2.71731	Peroxisome matrix		0
Q8WVX9	FAR1	Fatty acyl-CoA reductase 1	-2.7146	Peroxisome membrane	TMH	0	IRYGFNTILVILIWRIFI
P19971	TYMP	Thymidine phosphorylase	-2.70186			0
Q15067-2	ACOX1	Peroxisomal acyl-coenzyme A oxidase 1	-2.59831	Peroxisome		0
Q76L83	ASXL2	Putative Polycomb group protein ASXL2	-2.56175	Nucleus		0
Q96A35	MRPL24	39S ribosomal protein L24, mitochondrial	-2.51923	Mitochondrion		0
Q9NR77	PXMP2	Peroxisomal membrane protein 2	-2.49928	Peroxisome membrane	TMH	0	LYPVLTKAATSGILSALGNFL
O95801	TTC4	Tetratricopeptide repeat protein 4	-2.40661			0
Q9H0U9	TSPYL1	Testis-specific Y-encoded-like protein 1	-2.22034	Nucleus, Nucleolus		0
P09601	HMOX1	Heme oxygenase 1	-2.20593	Microsome, Endoplasmic reticulum membrane		0
Q9NYL2-3	ZAK	Mitogen-activated protein kinase kinase kinase MLT	-2.20369	Nucleus, Cytoplasm		0
Q8WXF7	ATL1	Atlastin-1	-2.19898	Cell projection, Golgi apparatus membrane, Endoplasmic reticulum membrane, Axon	TMH	0	TLFVVIFITYVIAGVTGFIGL
Q9Y597	KCTD3	BTB/POZ domain-containing protein KCTD3	-2.18609			0
E5RI60	ADAMTS1		-2.1404
P12110	COL6A2	Collagen alpha-2(VI) chain	-2.1327	Extracellular matrix, Membrane, Secreted, Extracellular space	SP	6	MLQGTCSVLLLWGILGAIQA
P29373	CRABP2	Cellular retinoic acid-binding protein 2	-2.1094	Endoplasmic reticulum, Cytoplasm, Nucleus		0
P29692-4	EEF1D	Elongation factor 1-delta	-2.06946	Nucleus		0
P05413	FABP3	Fatty acid-binding protein, heart	-2.0616	Cytoplasm		0
P28300	LOX	Protein-lysine 6-oxidase	-2.03138	Extracellular space, Secreted	SP	3	MRFAWTVLLLGPLQLCALVHC
Q7L2Z9	CENPQ	Centromere protein Q	-2.00764	Nucleus, Chromosome, Centromere		0
Q5VUM1	SDHAF4	Succinate dehydrogenase assembly factor 4, mitochondrial	-2.00194	Mitochondrion matrix		0
Q9BYG5	PARD6B	Partitioning defective 6 homolog beta	-1.96793	Cell membrane, Cell junction, Tight junction, Cytoplasm		0
Q7Z2K6	ERMP1	Endoplasmic reticulum metallopeptidase 1	-1.94703	Endoplasmic reticulum membrane	TMH	2	AGTGLSEVRAALGLALYLIAL
Q53TN4	CYBRD1	Cytochrome b reductase 1	-1.89223	Membrane	TMH	1	LLGSALLVGFLSVIFALVWVL
Q71RG4	TMUB2	Transmembrane and ubiquitin-like domain-containing protein 2	-1.88804	Membrane	TMH	0	VMVVAGVVVLILALVLAWLST
P50238	CRIP1	Cysteine-rich protein 1	-1.88791			0
P28288	ABCD3	ATP-binding cassette sub-family D member 3	-1.85064	Peroxisome membrane	TMH	3	GYLVLIAVMLVSRTYCDVWMI
P31273	HOXC8	Homeobox protein Hox-C8	-1.84095	Nucleus		0
P22307	SCP2	Non-specific lipid-transfer protein	-1.83665	Peroxisome, Mitochondrion, Cytoplasm		0
P52566	ARHGDIB	Rho GDP-dissociation inhibitor 2	-1.83453	Cytosol, Cytoplasm		0
Q96PE7	MCEE	Methylmalonyl-CoA epimerase, mitochondrial	-1.8242	Mitochondrion		0
Q15847	ADIRF	Adipogenesis regulatory factor	-1.82146	Nucleus		0
Q9H5V8	CDCP1	CUB domain-containing protein 1	-1.7898	Secreted, Cell membrane	SP	7	MAGLNCGVSIALLGVLLLGAARLPRGAEA
F5H0B0			-1.78852
P12111	COL6A3	Collagen alpha-3(VI) chain	-1.77351	Extracellular space, Secreted, Extracellular matrix	SP	15	MRKHRHLPLVAVFCLFLSGFPTTHA
Q96Q45	TMEM237	Transmembrane protein 237	-1.76811	Cell projection, Membrane, Cilium	TMH	0	MIGLFSHGFLAGCAVWNIVVI
Q9BV57	ADI1	1,2-dihydroxy-3-keto-5-methylthiopentene dioxygenase	-1.76063	Nucleus, Cell membrane, Cytoplasm		0
Q8WUZ0	BCL7C	B-cell CLL/lymphoma 7 protein family member C	-1.65422			0
Q8N488	RYBP	RING1 and YY1-binding protein	-1.64056	Nucleus, Nucleoplasm, Cytoplasm		0
Q9Y6X5	ENPP4	Bis(5'-adenosyl)-triphosphatase ENPP4	-1.53538	Cell membrane	SP	4	MKLLVILLFSGLITG
Q96MF7	NSMCE2	E3 SUMO-protein ligase NSE2	-1.52197	Nucleus, Chromosome, PML body, Telomere		0
H7C2F2	CD99		-1.4738
Q96BY6	DOCK10	Dedicator of cytokinesis protein 10	-1.46426			0
Q5T280	C9orf114	Putative methyltransferase C9orf114	-1.43999	Kinetochore, Centromere, Chromosome		0
P21980	TGM2	Protein-glutamine gamma-glutamyltransferase 2	-1.43899			0
Q92743	HTRA1	Serine protease HTRA1	-1.42906	Cell membrane, Secreted, Cytoplasm, Cytosol	SP	0	MQIPRAALLPLLLLLLAAPASA
Q15836	VAMP3	Vesicle-associated membrane protein 3	-1.41812	Synapse, Membrane, Cell junction, Synaptosome	TMH	0	MWAIGITVLVIFIIIIIVWVV
Q9NWU1	OXSM	3-oxoacyl-[acyl-carrier-protein] synthase, mitochondrial	-1.40098	Mitochondrion		0
Q96RY7	IFT140	Intraflagellar transport protein 140 homolog	-1.39969	Cytoplasm, Microtubule organizing center, Centrosome, Cytoskeleton, Cilium basal body		0
Q684P5	RAP1GAP2	Rap1 GTPase-activating protein 2	-1.39714	Cytoplasm, Perinuclear region		0
Q08431	MFGE8	Lactadherin	-1.3326	Membrane, Secreted	SP	5	MPRPRLLAALCGALLCAPSLLVA
O95084	PRSS23	Serine protease 23	-1.31129	Secreted	SP	2	MAGIPGLLFLLFFLLCAVG
Q9BTZ2	DHRS4	Dehydrogenase/reductase SDR family member 4	-1.29947	Peroxisome, Nucleus		0
Q9UJ83	HACL1	2-hydroxyacyl-CoA lyase 1	-1.29631	Peroxisome		0
P22694	PRKACB	cAMP-dependent protein kinase catalytic subunit beta	-1.29284	Cell membrane, Nucleus, Membrane, Cytoplasm		0
P18084	ITGB5	Integrin beta-5	-1.27779	Membrane	SP	8	MPRAPAPLYACLLGLCALLPRLA
P23142-4	FBLN1	Fibulin-1	-1.26888	Extracellular space, Secreted, Extracellular matrix	SP	3	MERAAPSRRVPLPLLLLGGLALLAAGVDA
P12109	COL6A1	Collagen alpha-1(VI) chain	-1.25593	Extracellular space, Secreted, Extracellular matrix	SP	5	MRAARALLPLLLQACWTAA
O94808	GFPT2	Glutamine--fructose-6-phosphate aminotransferase [isomerizing] 2	-1.25467			0
Q8NBP7	PCSK9	Proprotein convertase subtilisin/kexin type 9	-1.24914	Endosome, Golgi apparatus, Cell surface, Secreted, Cytoplasm, Endoplasmic reticulum, Lysosome	SP	1	MGTVSSRRSWWPLPLLLLLLLLLGPAGARA
Q96CG8	CTHRC1	Collagen triple helix repeat-containing protein 1	-1.22901	Extracellular space, Secreted, Extracellular matrix	SP	1	MRPQGPAASPQRLRGLLLLLLLQLPAPSSA
Q8N5I4	DHRSX	Dehydrogenase/reductase SDR family member on chromosome X	-1.19259		SP	0	MSPLSAARAALRVYAVGAAVILAQLLRRCRG
P10321	HLA-C	HLA class I histocompatibility antigen, Cw-7 alpha chain	-1.13427	Membrane	SP	1	MRVMAPRALLLLLSGGLALTETWA
Q76M96	CCDC80	Coiled-coil domain-containing protein 80	-1.1102	Secreted, Extracellular space, Extracellular matrix	SP	0	MTWRMGPRFTMLLAMWLVCGS
P00966	ASS1	Argininosuccinate synthase	-1.0911			0
Q9ULW5	RAB26	Ras-related protein Rab-26	-1.08244	Secretory vesicle membrane, Golgi apparatus membrane, Cytoplasmic vesicle		0
O95197-5	RTN3	Reticulon-3	-1.08047	Endoplasmic reticulum membrane, Golgi apparatus membrane		0
P22413	ENPP1	Ectonucleotide pyrophosphatase/phosphodiesterase family member 1	-1.07114	Secreted, Basolateral cell membrane, Cell membrane	TMH	9	VLSLVLSVCVLTTILGCIFGL
Q9UPW0	FOXJ3	Forkhead box protein J3	-1.07075	Nucleus		0
P02533	KRT14	Keratin, type I cytoskeletal 14	-1.06329	Nucleus, Cytoplasm		0
Q9HBL0	TNS1	Tensin-1	-1.04317	Cell junction, Cytoplasm, Focal adhesion, Cell surface, Cytoskeleton		0
O00469-2	PLOD2	Procollagen-lysine,2-oxoglutarate 5-dioxygenase 2	-1.0391	Rough endoplasmic reticulum membrane	SP	7	MGGCTVKPQLLLLALVLHPWNPCLG
Q6ZS30	NBEAL1	Neurobeachin-like protein 1	-1.01644			0
Q7Z6B0	CCDC91	Coiled-coil domain-containing protein 91	-1.01149	Membrane, trans-Golgi network membrane, Golgi apparatus		0
Q8IXI2	RHOT1	Mitochondrial Rho GTPase 1	-1.00658	Mitochondrion outer membrane	TMH	0	WLRASFGATVFAVLGFAMYKALL
P12107	COL11A1	Collagen alpha-1(XI) chain	-1.00516	Extracellular matrix, Extracellular space, Secreted	SP	1	MEPWSSRWKTKRWLWDFTVTTLALTFLFQAREVRG
P56181	NDUFV3	NADH dehydrogenase [ubiquinone] flavoprotein 3, mitochondrial	-0.981034	Mitochondrion inner membrane		0
Q15113	PCOLCE	Procollagen C-endopeptidase enhancer 1	-0.977427	Secreted	SP	2	MLPAATASLLGPLLTACALLPFAQG
Q8WWI1-3	LMO7	LIM domain only protein 7	-0.976729			0
P26447	S100A4	Protein S100-A4	-0.966088			0
P51955	NEK2	Serine/threonine-protein kinase Nek2	-0.961477	Centromere, Microtubule organizing center, Centrosome, Kinetochore, Nucleus, Chromosome, Spindle pole, Cytoplasm, Cytoskeleton, Nucleolus		0
Q5TB30	DEPDC1	DEP domain-containing protein 1A	-0.952051	Nucleus		0
P21506	ZNF10	Zinc finger protein 10	-0.940022	Nucleus		0
Q9BRQ8	AIFM2	Apoptosis-inducing factor 2	-0.936365	Membrane, Cytoplasm, Mitochondrion outer membrane	TMH	0	VESGALHVVIVGGGFGGIAAA
P33908	MAN1A1	Mannosyl-oligosaccharide 1,2-alpha-mannosidase IA	-0.931901	Golgi apparatus membrane	TMH	1	FVLLLVFSAFITLCFGAIFFL
Q9NUL7	DDX28	Probable ATP-dependent RNA helicase DDX28	-0.926353	Mitochondrion, Nucleus, Mitochondrion matrix, Mitochondrion nucleoid		0
Q13886	KLF9	Krueppel-like factor 9	-0.914022	Nucleus		0
Q8N6N7	ACBD7	Acyl-CoA-binding domain-containing protein 7	-0.906232			0
P05362	ICAM1	Intercellular adhesion molecule 1	-0.884947	Membrane	SP	9	MAPSSPRPALPALLVLLGALFPGPGNA
Q8WY36	BBX	HMG box transcription factor BBX	-0.875302	Nucleus		0
P07858	CTSB	Cathepsin B	-0.874613	Lysosome, Melanosome, Secreted, Extracellular space	SP	1	MWQLWASLCCLLVLANA
Q96GK7	FAHD2A	Fumarylacetoacetate hydrolase domain-containing protein 2A	-0.848834			0
P55010	EIF5	Eukaryotic translation initiation factor 5	-0.845826			0
Q6IAN0	DHRS7B	Dehydrogenase/reductase SDR family member 7B	-0.844349	Endoplasmic reticulum membrane	TMH	0	FITSTAILPLLFGCLGVFGLF
Q16363	LAMA4	Laminin subunit alpha-4	-0.817938	Extracellular matrix, Basement membrane, Extracellular space, Secreted	SP	19	MALSSAWRSVLPLWLLWSAACSRA
P47712	PLA2G4A	Cytosolic phospholipase A2	-0.809576	Cytoplasm, Cytoplasmic vesicle		0
P17544-2	ATF7	Cyclic AMP-dependent transcription factor ATF-7	-0.797763	Cytoplasm, Nucleoplasm, Nucleus		0
Q8IVL5	LEPREL1	Prolyl 3-hydroxylase 2	-0.796218	Endoplasmic reticulum, Golgi apparatus	SP	2	MRERIWAPPLLLLLPLLLPPPLWG
Q99536	VAT1	Synaptic vesicle membrane protein VAT-1 homolog	-0.790653	Mitochondrion outer membrane, Cytoplasm		0
P33764	S100A3	Protein S100-A3	-0.778993	Cytoplasm		0
Q92968	PEX13	Peroxisomal membrane protein PEX13	-0.753772	Peroxisome membrane	TMH	0	AATSAKSWPIFLFFAVILGGPYLIW
Q02252	ALDH6A1	Methylmalonate-semialdehyde dehydrogenase [acylating], mitochondrial	-0.743513	Mitochondrion		0
E9PMS6	LMO7		-0.732204
Q14554	PDIA5	Protein disulfide-isomerase A5	-0.730884	Endoplasmic reticulum lumen	SP	0	MARAGPAWLLLAIWVVLPSWL
E7EVQ5	CTHRC1		-0.72598
Q5T2T1	MPP7	MAGUK p55 subfamily member 7	-0.71862	Adherens junction, Membrane, Cell junction, Tight junction		0
Q8IZ83	ALDH16A1	Aldehyde dehydrogenase family 16 member A1	-0.710168			0
Q9H788	SH2D4A	SH2 domain-containing protein 4A	-0.700481	Cytoplasm		0
Q13825	AUH	Methylglutaconyl-CoA hydratase, mitochondrial	-0.697177	Mitochondrion		0
Q08AF3	SLFN5	Schlafen family member 5	-0.690073			0
P34931	HSPA1L	Heat shock 70 kDa protein 1-like	-0.684043			0
Q15170	TCEAL1	Transcription elongation factor A protein-like 1	-0.658803	Nucleus		0
Q9Y680	FKBP7	Peptidyl-prolyl cis-trans isomerase FKBP7	-0.621394	Endoplasmic reticulum lumen	SP	2	MPKTMHFLFRFIVFFYLWGLFTA
P38606	ATP6V1A	V-type proton ATPase catalytic subunit A	-0.576517			0
Q6YP21	CCBL2	Kynurenine--oxoglutarate transaminase 3	-0.560669			0
P08727	KRT19	Keratin, type I cytoskeletal 19	-0.548701			0
O95819	MAP4K4	Mitogen-activated protein kinase kinase kinase kinase 4	-0.491084	Cytoplasm		0
P52292	KPNA2	Importin subunit alpha-1	-0.457769	Cytoplasm, Nucleus		0
P09972	ALDOC	Fructose-bisphosphate aldolase C	-0.426079			0
