# Supplementary material for: Quantitative Proteomics and Differential Protein Abundance Analysis after the Depletion of PEX3 from Human Cells Identifies Additional Aspects of Protein Targeting to the ER
Source: Int J Mol Sci. 2021 Dec 1;22(23):13028. doi: 10.3390/ijms222313028 (PMC8658024; doi:10.3390/ijms222313028)
Supplement: Supplementary file 1 [file ijms-22-13028-s001.zip › Table S5_pex_3_Zellweger_full_up.xlsx]

## Sheet: Sheet 1
Accession	Gene	Full protein name	log2 fold change	Subcellular location	SS or TMH	Glycosylation sites	SP or TMH seq.
Q14914	PTGR1	Prostaglandin reductase 1	5.8874	Cytoplasm		0
Q14126	DSG2	Desmoglein-2	4.80217	Desmosome, Cell membrane, Cell junction	SP	5	MARSPGRAYALLLLLICFNVGSG
P13591	NCAM1	Neural cell adhesion molecule 1	4.50198	Secreted, Cell membrane	SP	6	MLQTKDLIWTLFFLGTAVS
P48681	NES	Nestin	3.80913			0
P16083	NQO2	Ribosyldihydronicotinamide dehydrogenase [quinone]	3.74229	Cytoplasm		0
O43854	EDIL3	EGF-like repeat and discoidin I-like domain-containing protein 3	3.50516	Secreted	SP	3	MKRSVAVWLLVGLSLGVPQFGKG
P20591	MX1	Interferon-induced GTP-binding protein Mx1	3.12758	Perinuclear region, Endoplasmic reticulum membrane, Nucleus, Cytoplasm		0
Q8TDZ2	MICAL1	[F-actin]-methionine sulfoxide oxidase MICAL1	2.67838	Cytoplasm, Cytoskeleton		0
Q9UQ03	CORO2B	Coronin-2B	2.65279	Cytoskeleton, Cytoplasm		0
P51911	CNN1	Calponin-1	2.49367			0
P32004-2	L1CAM	Neural cell adhesion molecule L1	2.42727	Cell projection, Growth cone, Cell membrane	SP	20	MVVALRYVWPLLLCSPCLL
Q9H0Z9	RBM38;RBM24	RNA-binding protein 38	2.26865	Nucleus, Cytosol, Cytoplasm		0
Q96G46	DUS3L	tRNA-dihydrouridine(47) synthase [NAD(P)(+)]-like	2.226			0
P09488	GSTM1	Glutathione S-transferase Mu 1	2.17951	Cytoplasm		0
Q8NDA8	MROH1	Maestro heat-like repeat-containing protein family member 1	2.15565			0
Q9Y3R5	DOPEY2	Protein dopey-2	2.04966			0
Q00978	IRF9	Interferon regulatory factor 9	2.04349	Nucleus, Cytoplasm		0
P17028	ZNF24	Zinc finger protein 24	2.02764	Nucleus		0
Q7Z7K6	CENPV	Centromere protein V	2.01093	Cytoplasm, Kinetochore, Chromosome, Centromere, Nucleus, Spindle, Cytoskeleton		0
Q02224	CENPE	Centromere-associated protein E	1.95835	Kinetochore, Cytoplasm, Chromosome, Centromere, Spindle, Cytoskeleton		0
Q13563	PKD2	Polycystin-2	1.9433	Endoplasmic reticulum, Cell projection, Cilium membrane, Cell membrane	TMD	5	LVTYLLFLIVLCILTYGMMSS
Q8WTS1	ABHD5	1-acylglycerol-3-phosphate O-acyltransferase ABHD5	1.8847	Lipid droplet, Cytoplasm		0
Q86WV6	TMEM173	Stimulator of interferon genes protein	1.84564	Mitochondrion outer membrane, Cytoplasm, Perinuclear region, Endoplasmic reticulum membrane, Cell membrane	TMD	0	AALVLLSACLVTLWGLGEPPE
Q99966	CITED1	Cbp/p300-interacting transactivator 1	1.79706	Cytoplasm, Nucleus		0
O75970	MPDZ	Multiple PDZ domain protein	1.77	Tight junction, Cell junction, Cell projection, Synaptosome, Postsynaptic density, Dendrite, Cell membrane, Postsynaptic cell membrane, Synapse, Apical cell membrane		0
P50453	SERPINB9	Serpin B9	1.72368	Cytoplasm		0
Q9P2Q2	FRMD4A	FERM domain-containing protein 4A	1.67902	Cytoplasm, Cytoskeleton		0
O00458	IFRD1	Interferon-related developmental regulator 1	1.65991			0
Q8WUF5	PPP1R13L	RelA-associated inhibitor	1.59723	Cytoplasm, Nucleus		0
P04003	C4BPA	C4b-binding protein alpha chain	1.56939	Secreted	SP	3	MHPPKTPSGALHRKRKMAAWPFSRLWKVSDPILFQMTLIAALLPAVLG
Q96PE2	ARHGEF17	Rho guanine nucleotide exchange factor 17	1.56764			0
Q86WN1	FCHSD1	F-BAR and double SH3 domains protein 1	1.55097			0
Q9C040	TRIM2	Tripartite motif-containing protein 2	1.5396	Cytoplasm		0
Q9NRK6	ABCB10	ATP-binding cassette sub-family B member 10, mitochondrial	1.53809	Mitochondrion inner membrane	TMD	0	LAAAVGFLTMSSVISMSAPFF
Q9BYK8	HELZ2	Helicase with zinc finger domain 2	1.50113	Nucleus		0
Q14123	PDE1C	Calcium/calmodulin-dependent 3',5'-cyclic nucleotide phosphodiesterase 1C	1.44275			0
P29728	OAS2	2'-5'-oligoadenylate synthase 2	1.43576	Microsome, Endoplasmic reticulum, Cytoplasm, Perinuclear region, Mitochondrion, Nucleus		0
Q9BQE4	VIMP;SELS	Selenoprotein S	1.42888	Endoplasmic reticulum membrane, Cytoplasm	TMD	0	SLLATYGWYIVFSCILLYVVF
O14558	HSPB6	Heat shock protein beta-6	1.40868	Nucleus, Cytoplasm		0
Q7Z5J4	RAI1	Retinoic acid-induced protein 1	1.37385	Nucleus, Cytoplasm		0
P11498	PC	Pyruvate carboxylase, mitochondrial	1.33928	Mitochondrion matrix		0
P37837	TALDO1	Transaldolase	1.3217	Cytoplasm		0
P54284	CACNB3	Voltage-dependent L-type calcium channel subunit beta-3	1.29423			0
Q4AC94	C2CD3	C2 domain-containing protein 3	1.26076	Cytoskeleton, Cilium basal body, Cytoplasm, Microtubule organizing center, Centrosome, Centriole		0
O60443	DFNA5	Non-syndromic hearing impairment protein 5	1.25918	Cytosol, Cytoplasm, Cell membrane		0
Q03393	PTS	6-pyruvoyl tetrahydrobiopterin synthase	1.24591			0
Q96CC6	RHBDF1	Inactive rhomboid protein 1	1.22081	Golgi apparatus membrane, Endoplasmic reticulum membrane	TMD	1	FVHSLVTILAVCIYGIAPVGF
Q16773	CCBL1	Kynurenine--oxoglutarate transaminase 1	1.21151	Cytoplasm		0
Q9BRF8	CPPED1	Serine/threonine-protein phosphatase CPPED1	1.20951	Cytoplasm		0
Q9NZV5	SEPN1	Selenoprotein N	1.17998	Endoplasmic reticulum membrane	SP	5	MGRARPGQRGPPSPGPAAQPPAPPRRRARSLALLGALLAAAAA
P12429	ANXA3	Annexin A3	1.17497			0
P34896	SHMT1	Serine hydroxymethyltransferase, cytosolic	1.15364	Cytoplasm		0
P14317	HCLS1	Hematopoietic lineage cell-specific protein	1.14101	Membrane, Cytoplasm, Mitochondrion		0
Q16635	TAZ	Tafazzin	1.13628	Cytoplasm, Membrane	TMD	0	MPLHVKWPFPAVPPLTWTLASSVVMGLVGT
O14730	RIOK3	Serine/threonine-protein kinase RIO3	1.12264			0
P56199	ITGA1	Integrin alpha-1	1.10672	Membrane	SP	26	MAPRPRARPGVAVACCWLLTVVLRCCVS
Q5W111	SPRYD7	SPRY domain-containing protein 7	1.09825			0
O60343	TBC1D4	TBC1 domain family member 4	1.08712	Cytoplasm		0
Q08357	SLC20A2	Sodium-dependent phosphate transporter 2	1.07707	Cell membrane	TMD	1	YLWMVILGFIIAFILAFSVGA
Q7Z4H8	KDELC2	KDEL motif-containing protein 2	1.07397	Endoplasmic reticulum lumen	SP	2	MRRLPRALLLQLRLALLVAA
P00491	PNP	Purine nucleoside phosphorylase	1.04178	Cytoplasm, Cytoskeleton		0
P07203	GPX1	Glutathione peroxidase 1	1.02933	Cytoplasm		0
P50583	NUDT2	Bis(5'-nucleosyl)-tetraphosphatase [asymmetrical]	1.02333			0
Q9BYC5	FUT8	Alpha-(1,6)-fucosyltransferase	1.00039	Golgi apparatus, Golgi stack membrane	TMD	0	WIMLILFAWGTLLFYIGGHLV
P31483-2	TIA1	Nucleolysin TIA-1 isoform p40	0.984242	Nucleus, Cytoplasmic granule		0
Q7Z5G4	GOLGA7;GOLGA7B	Golgin subfamily A member 7	0.973849	Golgi apparatus membrane		0
Q8N3R9	MPP5	MAGUK p55 subfamily member 5	0.968495	Endomembrane system, Cell membrane, Tight junction, Cell junction		0
P05161	ISG15	Ubiquitin-like protein ISG15	0.947928	Secreted, Cytoplasm		0
Q7Z6K3	PTAR1	Protein prenyltransferase alpha subunit repeat-containing protein 1	0.943048			0
Q68CZ2	TNS3	Tensin-3	0.91777	Focal adhesion, Cell junction		0
Q8WZA9	IRGQ	Immunity-related GTPase family Q protein	0.905413			0
Q8N3F8	MICALL1	MICAL-like protein 1	0.900007	Late endosome membrane, Recycling endosome membrane		0
Q9Y5T4	DNAJC15	DnaJ homolog subfamily C member 15	0.892739	Mitochondrion inner membrane	TMD	0	LVRSLIAVGLGVAALAFAGRYAF
P15924	DSP	Desmoplakin	0.876621	Cell junction, Cytoplasm, Cell membrane, Cytoskeleton, Desmosome		0
Q9H8T0	AKTIP	AKT-interacting protein	0.875048	Cell membrane, Cytoplasm		0
Q9Y4D1	DAAM1	Disheveled-associated activator of morphogenesis 1	0.869508	Cilium basal body, Cytoskeleton, Cytoplasm		0
Q12851	MAP4K2	Mitogen-activated protein kinase kinase kinase kinase 2	0.866645	Golgi apparatus membrane, Cytoplasm, Basolateral cell membrane		0
Q9Y6K5	OAS3	2'-5'-oligoadenylate synthase 3	0.858336	Cytoplasm, Nucleus		0
O14524	TMEM194A	Nuclear envelope integral membrane protein 1	0.857087	Nucleus envelope, Nucleus inner membrane	SP	1	MAGGMKVAVSPAVGPGPWGSGVGGGGTVRLLLILSGCLVYGTA
Q86U70	LDB1;LDB2	LIM domain-binding protein 1	0.855775	Nucleus		0
Q96Q05	TRAPPC9	Trafficking protein particle complex subunit 9	0.841425	Golgi apparatus, cis-Golgi network, Cytoplasm, Endoplasmic reticulum		0
P21266	GSTM3	Glutathione S-transferase Mu 3	0.82801	Cytoplasm		0
Q9BUH6	C9orf142	Protein PAXX	0.820167	Nucleus		0
P09619	PDGFRB	Platelet-derived growth factor receptor beta	0.816161	Lysosome lumen, Cytoplasmic vesicle, Cell membrane	SP	11	MRLPGAMPALALKGELLLLSLLLLLEPQISQG
Q08257	CRYZ	Quinone oxidoreductase	0.805127	Cytoplasm		0
Q96E52	OMA1	Metalloendopeptidase OMA1, mitochondrial	0.803666	Mitochondrion inner membrane	TMD	0	FLGLSSFGLLFVVFYFTHLEV
Q96G03	PGM2	Phosphoglucomutase-2	0.784284	Cytoplasm		0
P52789	HK2	Hexokinase-2	0.754984	Mitochondrion outer membrane		0
P08195	SLC3A2	4F2 cell-surface antigen heavy chain	0.75477	Melanosome, Apical cell membrane	TMD	4	LLLLFWLGWLGMLAGAVVIIV
P29317	EPHA2	Ephrin type-A receptor 2	0.743297	Focal adhesion, Cell membrane, Ruffle membrane, Cell projection, Cell junction, Lamellipodium membrane	SP	2	MELQAARACFALLWGCALAAAAA
P40337	VHL	Von Hippel-Lindau disease tumor suppressor	0.733574	Nucleus, Cytoplasm, Membrane		0
C9J840	MAP4K4		0.732044
Q6XUX3	DSTYK	Dual serine/threonine and tyrosine protein kinase	0.687493	Cell junction, Cytoplasm, Basolateral cell membrane, Apical cell membrane, Cell membrane		0
Q9NZN5	ARHGEF12	Rho guanine nucleotide exchange factor 12	0.666992	Membrane, Cytoplasm		0
Q96FQ6	S100A16	Protein S100-A16	0.622461	Nucleolus, Nucleus, Cytoplasm		0
O43432	EIF4G3	Eukaryotic translation initiation factor 4 gamma 3	0.58661			0
Q15013	MAD2L1BP	MAD2L1-binding protein	0.577046	Cytoplasm, Nucleus, Spindle, Cytoskeleton		0
