# Supplementary material for: Quantitative Proteomics and Differential Protein Abundance Analysis after the Depletion of PEX3 from Human Cells Identifies Additional Aspects of Protein Targeting to the ER
Source: Int J Mol Sci. 2021 Dec 1;22(23):13028. doi: 10.3390/ijms222313028 (PMC8658024; doi:10.3390/ijms222313028)
Supplement: Supplementary file 1 [file ijms-22-13028-s001.zip › Table S6_HeLaZoverlap.xlsx]

## Sheet: Sheet 1 - pex_1_all_summary_2
ID	Gene name	Fold change	Neg. log10 p-value 1	Neg. log10 p-value 2
P12109	COL6A1	-0.134	0.3929	1.0108
P02452	COL1A1	-0.7689	0.0805	0.0236
P12111	COL6A3	0.7152	0.1063	0.9948
Q8N5I4	DHRSX	-0.0169	0.9494	0.6516
O00469-2	PLOD2	0.0371	0.3436	0.047
O43752	STX6	-1.8606	0.9488	0.8144
Q5T8D3-3	ACBD5	-0.5508	3.1204	0.6217
Q92968	PEX13	-0.4698	0.6464	1.5837
Q92629	SGCD	-1.9385	7.0249	4.5069
P33908	MAN1A1	0.7779	1.7229	1.5651
Q8IVL5	LEPREL1	-0.2096	0.0418	0.7216
Q14554	PDIA5	0.0954	0.8271	0.1216
Q8WVX9	FAR1	0.7251	2.0169	2.4707
Q7Z2K6	ERMP1	0.2053	0.088	0.773
Q8NBP7	PCSK9	-0.0239	0.4136	0.2581
P28288	ABCD3	-0.4953	3.5602	0.5131
Q8IY95	TMEM192	-1.4374	6.6141	4.207
O00116	AGPS	0.1489	0.4314	0.0707
Q6IAN0	DHRS7B	-0.7895	2.1098	1.1165
Q99943	AGPAT1	-1.2749	7.1806	6.1584
Q9BRQ8	AIFM2	-0.2497	0.5134	0.1883
Q15836	VAMP3	-0.4013	0.0721	0.0429
P18084	ITGB5	0.0096	0.1697	0.1108
P07858	CTSB	-0.3557	1.2454	0.5487
Q71RG4	TMUB2	0.2295	0.0426	0.6479
P12110	COL6A2	0.3178	0.0568	3.5296
Q9NR77	PXMP2	-0.5619	2.6829	0.0648
P56589	PEX3	-3.4941	14.4755	7.78
P23142-4	FBLN1	-0.1821	0.6083	0.2222
Q9Y680	FKBP7	0.4869	1.6926	0.9453
P30508	HLA-C	-0.4393	0.0142	0.6945
O95197	RTN3	-0.2352	0.1371	0.3548
P05362	ICAM1	0.152	0.279	0.6676
Q5JTV8	TOR1AIP1	-0.2183	0.4501	0.7572
Q96Q45	TMEM237	0.0177	0.6147	0.2227
